# Supplementary material for: Light‐Driven Enantioselective Organocatalytic β‐Benzylation of Enals
Source: PubMed Central journal article supplement — Angew Chem Int Ed Engl. 2017 Feb 10;56(12):3304–8. doi: 10.1002/anie.201612159 (PMC5412672; doi:10.1002/anie.201612159), 2017-02-10
Supplement: ANIE-56-3304-s001.pdf [file ANIE-56-3304-s001.pdf]

Supporting Information

**Light-Driven Enantioselective Organocatalytic  $\beta$ -Benzylation of Enals**

*Luca Dell'Amico, Victor M. Fernández-Alvarez, Feliu Maseras,\* and Paolo Melchiorre\**

anie\_201612159\_sm\_miscellaneous\_information.pdf

## Supporting Information

## **Table of Contents**

|                                                                                            |          |
|--------------------------------------------------------------------------------------------|----------|
| <b>A. General Information</b>                                                              | page S3  |
| <b>B. Substrate Synthesis</b>                                                              | page S4  |
| <b>C. General Procedures for the Light-Driven <math>\beta</math>-Benzoylation of Enals</b> | page S6  |
| Characterization data                                                                      | page S7  |
| Products manipulations                                                                     | page S18 |
| <br>                                                                                       |          |
| <b>D. Mechanistic Investigations</b>                                                       | page S20 |
| Transient Absorption Spectroscopy Studies                                                  | page S20 |
| Control Experiments                                                                        | page S21 |
| Absorption Spectra                                                                         | page S22 |
| Computational Details                                                                      | page S23 |
| <br>                                                                                       |          |
| <b>E. X-ray Crystallographic Data</b>                                                      | page S45 |
| <br>                                                                                       |          |
| <b>F. References</b>                                                                       | page S46 |
| <br>                                                                                       |          |
| <b>G. NMR Spectra</b>                                                                      | page S47 |
| <br>                                                                                       |          |
| <b>H. HPLC Traces</b>                                                                      | page S81 |

## A. General Information

The NMR spectra were recorded at 400 MHz and 500 MHz for  $^1\text{H}$  or at 100 MHz and 125 MHz for  $^{13}\text{C}$ , respectively. The chemical shifts ( $\delta$ ) for  $^1\text{H}$  and  $^{13}\text{C}$  are given in ppm relative to residual signals of the solvents ( $\text{CHCl}_3$  @ 7.26 ppm  $^1\text{H}$  NMR, 77.16 ppm  $^{13}\text{C}$  NMR). Coupling constants are given in Hz. The following abbreviations are used to indicate the multiplicity: s, singlet; d, doublet; t, triplet; q, quartet; m, multiplet; bs, broad signal.

High-resolution mass spectra (HRMS) were obtained from the ICIQ High Resolution Mass Spectrometry Unit on Waters GCT gas chromatograph coupled time-of-flight mass spectrometer (GC/MS-TOF) with electron ionization (EI) or MicroTOF II (Bruker Daltonics): HPLC-MS-TOF (ESI). UV-vis measurements were carried out on a Shimadzu UV-2401PC spectrophotometer equipped with photomultiplier detector, double beam optics and  $\text{D}_2$  and W light sources. X-ray data were obtained from the ICIQ X-Ray Unit using a Bruker-Nonius diffractometer equipped with an APPEX 2 4K CCD area detector. Optical rotations were measured on a Polarimeter Jasco P-1030 and are reported as follows:  $[\alpha]_{\text{D}}$  rt (c in g per 100 mL, solvent).

Studies with nanosecond transient absorption spectroscopy (TAS) were performed using an excitation source of Nd:YAG (neodymium-doped yttrium aluminium garnet) tuned with an optical parametric oscillator (OPO) from Opolette as a pump source. This laser produces 6 ns pulses of 1 mJ at a wavelength of 355 nm. The system is completed with two monochromators with double grating at the VIS and IR, and a digital recorder DSP-DAU from RAMDSP. A photodetector amplifiers and a software control complete the TAS system.

*The authors are indebted to the team of the Research Support Area at ICIQ, in particular to: Dr. Eduardo Escudero-Adan (X-ray Unit), Dr. Marta Giménez (Chemical Reaction Technologies Unit), and Dr. Javier Pérez (Photophysics Unit). Grace Fox is thanked for proofreading the manuscript.*

Chromatographic purification of products was accomplished using force-flow chromatography (FC) on silica gel (35-70 mesh). For thin layer chromatography (TLC) analysis throughout this work, Merck precoated TLC plates (silica gel 60 GF<sub>254</sub>, 0.25 mm) were used, using UV light as the visualising agent and an acidic mixture of ceric ammonium molybdate or basic aqueous potassium permanganate ( $\text{KMnO}_4$ ), and heat as developing agents. Organic solutions were concentrated under reduced pressure on a Büchi rotary evaporator.

**Determination of Diastereomeric Ratio.** The diastereomeric ratio for the photoenolization/ $\beta$ -benzylation sequence (products **5**) was determined by  $^1\text{H}$  NMR analysis of the crude reaction mixture through integration of diagnostic signals, and then confirmed by HPLC analysis.

**Determination of Enantiomeric Purity:** HPLC analysis on chiral stationary phase was performed on an Agilent 1200-series instrumentation. Daicel Chiralpak IA, IB, ID, IC and IC-3 columns with hexane/*i*PrOH or hexane/*i*PrOH/DCM as the eluents were used. HPLC traces were compared to racemic samples prepared running the reaction in the presence of the racemic catalyst **4b**.

**Materials:** Commercial grade reagents and solvents were purchased at the highest commercial quality from Sigma Aldrich, Fluka, Acros Organics, and Alfa Aesar and used as received, unless otherwise stated. The chiral secondary amine catalysts (*S*)-(-)- $\alpha,\alpha$ -diphenyl-2-pyrrolidinemethanol trimethylsilyl ether (**4a**) and (*S*)-(-)- $\alpha,\alpha$ -diphenyl-2-pyrrolidinemethanol *tert*-butyldimethylsilyl ether (**4b**) are commercially available and were used without further purification.

Aliphatic  $\alpha,\beta$ -unsaturated aldehydes **3** are commercially available and were purchased from Sigma-Aldrich, Alfa Aesar or Acros Organics and used after distillation to avoid any presence of water or other stabilizers, and then stored at 2-4  $^\circ\text{C}$  under an argon atmosphere. Enal **3g** was prepared according to a previously reported procedure (1). Benzophenones **1a**, **1d** and **1m** were purchased from Sigma-Aldrich and used without further purifications. Benzophenones **1j** and **1l** were prepared according to (2). The preparation of the other benzophenones is detailed in Section B of the Supporting Information.

## B. Substrate Synthesis

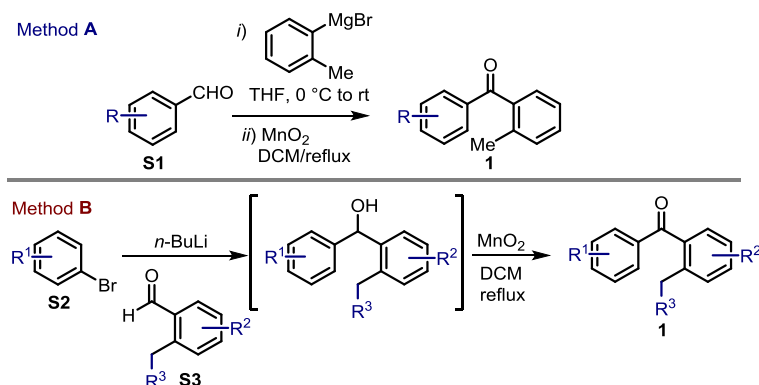

**Scheme S1.** Synthetic pathways for preparing the benzophenone substrates **1**

**Method A:** The commercially available benzaldehyde derivative **S1** (1 equiv.) was dissolved in dry THF (0.25 M) under an argon atmosphere. After cooling to 0 °C, a 0.5 M *p*-tolylmagnesium bromide solution in THF (1.2 equiv.) was slowly added under vigorous stirring. The mixture was allowed to warm up to ambient temperature (rt). Upon complete consumption of the starting aldehyde **S1**, as determined by TLC analysis, water was slowly added at 0 °C. The biphasic system was then extracted with Et<sub>2</sub>O (x 3). The organic phases were collected and concentrated under vacuum. The crude alcohol intermediate was dissolved in dry DCM (0.2 M solution) without any purification. Then, activated MnO<sub>2</sub> (7 equiv.) was added at once under an argon atmosphere, and the solution was warmed up at reflux for 10 hours. After cooling to ambient temperature, the mixture was filtered through a pad of silica and the residue washed with DCM. The organic solution was concentrated under vacuum and the crude mixture subjected to flash chromatography (FC) purification on silica to afford the benzophenone substrate **1**.

**Method B:** The commercially available bromobenzene derivative **S2** (1 equiv.) was dissolved in dry THF (0.25 M) under an argon atmosphere. After cooling the mixture to -30 °C, a solution of *n*-BuLi 1.9 M in hexane (1.5 equiv.) was added dropwise. After the addition, the solution was allowed to warm to ambient temperature and stirring was continued for 1 hour. The commercially available aldehyde derivative **S3** (1 equiv., 0.5 M solution in dry THF) was then added dropwise at 0 °C, and stirring was continued over 2 hours. The reaction was then quenched by carefully adding water and extracted with Et<sub>2</sub>O (x 3). The organic phases were collected and concentrated under vacuum. The crude alcohol intermediate was then subjected to MnO<sub>2</sub> oxidation as in Method A. FC purification on silica gel afforded the benzophenone substrate **1**.

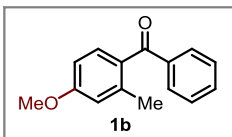

**(4-methoxy-2-methylphenyl)(phenyl)methanone (1b).** Following the procedure detailed in Method B, **1b** was isolated by FC on silica gel (hexane/EtOAc 97:3 v/v) in 77% yield as a colorless oil. TLC (hexane/EtOAc: 95:5 v/v):  $R_f = 0.32$ ; HRMS calculated for  $[C_{15}H_{14}O_2+Na]^+$ : 249.0891; found: 249.0894.

$^1H$  NMR (400 MHz,  $CDCl_3$ )  $\delta$  7.83 – 7.74 (m, 2H), 7.61 – 7.54 (m, 1H), 7.50 – 7.43 (m, 2H), 7.36 (d,  $J = 8.5$  Hz, 1H), 6.85 (dd,  $J = 2.5, 0.8$  Hz, 1H), 6.76 (ddd,  $J = 8.5, 2.6, 0.6$  Hz, 1H), 3.87 (s, 3H,  $CH_3$  OMe), 2.44 (d,  $J = 0.7$  Hz, 3H,  $CH_3$ ).  $^{13}C$  NMR (100 MHz,  $CDCl_3$ )  $\delta$  197.7 (C=O), 161.3 (Cq Ar), 140.6 (Cq Ar), 138.8 (Cq Ar), 132.5 (CH Ar), 132.1 (CH Ar), 130.7 (Cq Ar), 130.0 (CH Ar x2), 128.3 (CH Ar x2), 116.8 (CH Ar), 110.1 (CH Ar), 55.3 ( $CH_3$  OMe), 20.8 ( $CH_3$ ).

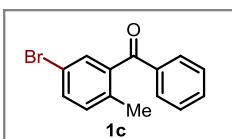

**(5-bromo-2-methylphenyl)(phenyl)methanone (1c).** Following the procedure reported in the literature (2), **1c** was isolated by FC on silica (hexane/EtOAc: 98:2 v/v) in 55% yield as a colorless oil. TLC (hexane/EtOAc: 98:2 v/v):  $R_f = 0.35$ ; HRMS calculated for  $[C_{14}H_{11}BrO+Na]^+$ : 296.9891; found: 296.9895.

$^1H$  NMR (400 MHz,  $CDCl_3$ )  $\delta$  7.85 – 7.78 (m, 2H, Ar), 7.62 (ddt,  $J = 8.7, 6.9, 1.3$  Hz, 1H, Ar), 7.55 – 7.42 (m, 4H, Ar), 7.19 (dd,  $J = 8.2, 0.8$  Hz, 1H, Ar), 2.27 (s, 3H,  $CH_3$ ).  $^{13}C$  NMR (100 MHz,  $CDCl_3$ )  $\delta$  196.9 (C=O), 140.5 (Cq Ar), 137.0 (Cq Ar), 135.5 (Cq Ar), 133.6 (CH Ar), 133.1 (CH Ar), 132.7 (CH Ar), 130.8 (CH Ar), 130.1 (CH Ar x2), 128.7 (CH Ar x2), 118.9 (Cq Ar), 19.5 ( $CH_3$ ).

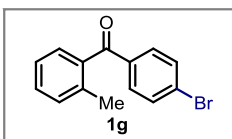

**(4-bromophenyl)(o-tolyl)methanone (1g).** Following the procedure detailed in Method A, **1g** was isolated by FC on silica (hexane/EtOAc: 98:2 v/v) in 76% yield as a colorless oil. TLC (hexane/EtOAc: 98:2 v/v):  $R_f = 0.34$ ; HRMS calculated for  $[C_{14}H_{11}BrO+Na]^+$ : 296.9891; found: 296.9893.

$^1H$  NMR (400 MHz,  $CDCl_3$ )  $\delta$  7.72 – 7.65 (m, 2H, Ar), 7.64 – 7.59 (m, 2H, Ar), 7.47 – 7.38 (m, 1H, Ar), 7.36 – 7.24 (m, 4H, Ar), 2.35 (s, 1H,  $CH_3$ ).  $^{13}C$  NMR (100 MHz,  $CDCl_3$ )  $\delta$  197.5 (C=O), 138.0 (Cq Ar), 136.8 (Cq Ar), 136.5 (Cq Ar), 131.8 (CH Ar x2), 131.6 (CH Ar x2), 131.2 (CH Ar), 130.5 (CH Ar), 128.5 (CH Ar), 128.4 (Cq Ar), 125.3 (CH Ar), 20.0 ( $CH_3$ ).

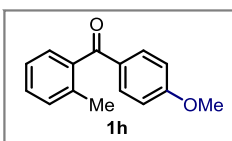

**(4-methoxyphenyl)(o-tolyl)methanone (1h).** Following the procedure detailed in Method A, **1h** was isolated by FC on silica (hexane/EtOAc: 98:2 v/v) in 76% yield as a colorless oil. TLC (hexane/EtOAc: 98:2 v/v):  $R_f = 0.34$ ; HRMS calculated for  $[C_{15}H_{14}O_2+Na]^+$ : 249.0891; found: 249.0896.

$^1H$  NMR (400 MHz,  $CDCl_3$ )  $\delta$  7.85 – 7.77 (m, 2H, Ar), 7.43 – 7.35 (m, 1H, Ar), 7.33 – 7.21 (m, 4H, Ar), 6.99 – 6.89 (m, 2H, Ar), 3.89 (s, 3H,  $CH_3$  OMe), 2.33 (s, 3H,  $CH_3$ ).  $^{13}C$  NMR (100 MHz,  $CDCl_3$ )  $\delta$  197.4 (C=O), 163.7 (Cq Ar), 139.2 (Cq Ar), 136.2 (Cq Ar), 132.5 (CH Ar x2), 130.8 (CH Ar), 130.5 (Cq Ar), 129.8 (CH Ar), 127.9 (CH Ar), 125.2 (CH Ar), 113.7 (Cq Ar x2), 55.5 ( $CH_3$  OMe), 19.8 ( $CH_3$ ).

## C. General Procedures for the Enantioselective Organocatalytic Photoenolization/ $\beta$ -Benylation Sequence

### General Procedure A (for aliphatic enals)

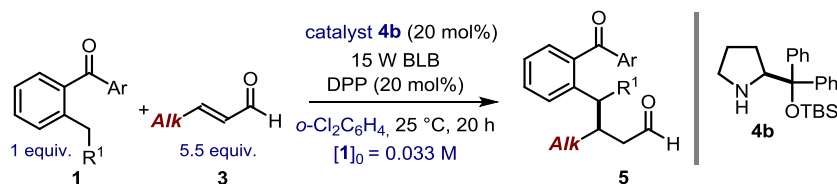

An oven-dried, 10 mL Schlenk tube was charged with the chiral secondary amine catalyst (*S*)-(-)- $\alpha,\alpha$ -diphenyl-2-pyrrolidinemethanol *tert*-butyldimethylsilyl ether **4b** (15 mg, 0.04 mmol, 0.2 equiv.), diphenyl phosphoric acid (DPP, 10 mg, 0.04 mmol, 0.2 equiv.) and 5 mL of 1,2-dichlorobenzene (*o*-Cl<sub>2</sub>C<sub>6</sub>H<sub>4</sub>). The tube was placed under an argon atmosphere, and then benzophenone **1** (1 equiv.) and a freshly distilled enal **3** (5.5 equiv.) were sequentially added. The mixture was diluted with additional 1 mL of *o*-Cl<sub>2</sub>C<sub>6</sub>H<sub>4</sub>. The reaction mixture was degassed via freeze pump thaw: the mixture was cooled to  $-78$  °C and degassed via vacuum evacuation (5 min), backfilled with argon, and then warmed up to ambient temperature (this process was repeated four times). The tube was sealed and positioned approximately 3 cm away from three light sources. A set of household 15 W Black Light Bulbs (BLB) were used for irradiating the reaction mixture (see Figure S1 for the emission spectrum and the reaction set-up). After stirring for 20 hours, the crude mixture was directly charged on a column and subjected to flash chromatography (FC) on silica gel to afford the title compound **5** in the stated yield and optical purity.

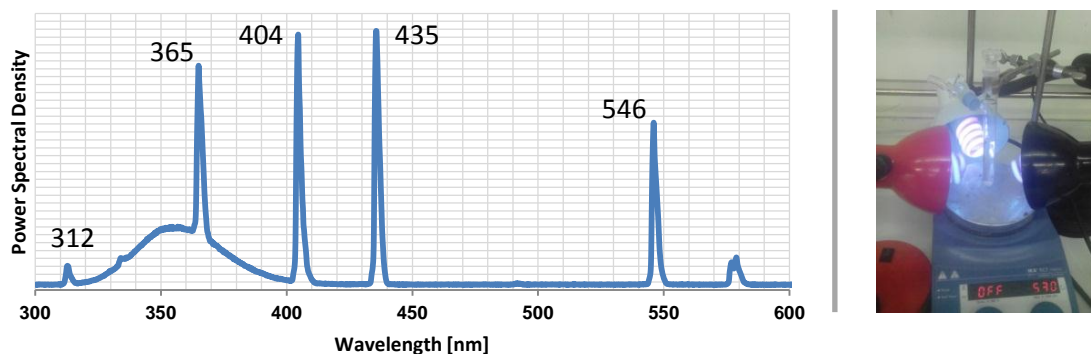

**Figure S1.** Emission spectrum of the 15 W BLB lamp used in this study (left) and the set-up of the reaction (right). The high intensity of emission at 365 nm secured an efficient excitation of the benzophenone substrate **1** and the generation of the reactive photoenol. The use of different light sources, including a compact fluorescence light (CFL) bulb or a white LED strip, resulted in greatly reduced reactivity.

## General Procedure B (for aromatic enals)

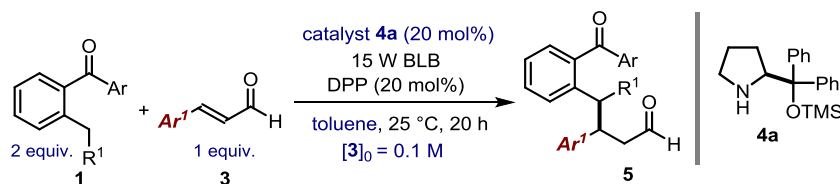

An oven-dried, 10 mL Schlenk tube was charged with the chiral secondary amine catalyst (*S*)-(-)- $\alpha,\alpha$ -diphenyl-2-pyrrolidinemethanol trimethylsilyl ether **4a** (13 mg, 0.04 mmol, 0.2 equiv.), diphenyl phosphoric acid (DPP, 10 mg, 0.04 mmol, 0.2 equiv.) and 1 mL of toluene. The tube was placed under an argon atmosphere, and then benzophenone **1** (2 equiv.) and a freshly distilled enal **3** (1 equiv.) were sequentially added. The mixture was diluted with additional 1 mL of toluene. The reaction mixture was degassed via freeze pump thaw: the mixture was cooled to  $-78 \text{ }^\circ\text{C}$  and degassed via vacuum evacuation (5 min), backfilled with argon, and then warmed up to ambient temperature (this process was repeated four times). The tube was sealed and positioned approximately 3 cm away from three light sources. A set of household 15 W Black Light Bulbs (BLB) were used for irradiating the reaction mixture (see Figure S1 in the previous page for the emission spectrum and the reaction set-up). After stirring for 20 hours, the crude mixture was directly subjected to flash chromatography (FC) to afford the title compound **5** in the stated yield and optical purity.

## Characterization Data

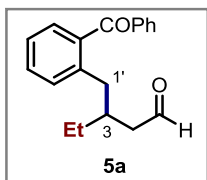

**(*S*)-3-(2-benzoylbenzyl)pentanal (5a)**. Compound **5a** was prepared according to the general procedure A, using 2-methylbenzophenone **1a** (36  $\mu\text{L}$ , 0.2 mmol, 1 equiv.), *trans*-2-pentenal (108  $\mu\text{L}$ , 1.1 mmol, 5.5 equiv.), diphenyl phosphoric acid (10 mg, 0.04 mmol, 0.2 equiv.) and catalyst **4b** (15 mg, 0.04 mmol, 0.2 equiv.). The crude mixture was purified by flash column chromatography (hexane/EtOAc: 90:10 v/v) to afford the title compound as a colorless oil (34 mg, 61% yield, 90% ee). TLC: (hexane/EtOAc: 90:10 v/v),  $R_f = 0.32$ . The ee (90%) was determined by HPLC analysis on a Daicel Chiralpak IC column: 85:15 hexane/*i*PrOH, flow rate 1.00 mL/min;  $\lambda = 254 \text{ nm}$ ;  $\tau_{\text{major}} = 14.3 \text{ min}$ ,  $\tau_{\text{minor}} = 15.6 \text{ min}$ .  $[\alpha]_D^{26} = +75.6$  ( $c = 0.5$  in  $\text{CHCl}_3$ ). HRMS calculated for  $[\text{C}_{19}\text{H}_{20}\text{O}_2 + \text{Na}]^+$ : 303,1361; found: 303,1363.

**$^1\text{H NMR}$  (500 MHz,  $\text{CDCl}_3$ )**  $\delta$  9.58 (t,  $J = 2.2 \text{ Hz}$ , 1H, CHO), 7.86 – 7.76 (m, 2H, Ar), 7.67 – 7.55 (m, 1H, Ar), 7.54 – 7.39 (m, 3H, Ar), 7.38 – 7.25 (m, 3H, Ar), 2.86 (dd,  $J = 13.7, 6.5 \text{ Hz}$ , 1H, H1' $\alpha$ ), 2.57 (dd,  $J = 13.7, 8.1 \text{ Hz}$ , 1H, H1'  $\beta$ ),  $\delta$  2.31 (d,  $J = 2.2 \text{ Hz}$ , 1H, H2 $\alpha$ ), 2.30 (d,  $J = 2.3 \text{ Hz}$ , 1H, H2 $\beta$ ) 2.19 (m, 1H, H3), 1.38 – 1.29 (m, 2H,  $\text{CH}_2$ , H4), 0.83 (t,  $J = 7.4 \text{ Hz}$ , 3H,  $\text{CH}_3$ ).  **$^{13}\text{C NMR}$  (125 MHz,  $\text{CDCl}_3$ )**  $\delta$  202.8 (C=O), 198.4 (CHO), 139.3 (Cq Ar), 138.9 (Cq Ar), 137.8 (Cq Ar), 133.3 (CH Ar) 131.1 (CH Ar), 130.2 (CH Ar x2), 130.2 (CH Ar), 128.9 (CH Ar x2), 128.5 (CH Ar x2), 125.7 (CH Ar), 47.5 ( $\text{CH}_2$ ), 37.5 ( $\text{CH}_2$ ), 36.7 (CH), 26.8 ( $\text{CH}_2$ ), 10.9 ( $\text{CH}_3$ ).

Compound **5a** was also obtained through a 1 mmol scale procedure using 2-methylbenzophenone **1a** (181  $\mu\text{L}$ , 1 mmol, 1 equiv.), *trans*-2-pentenal (540  $\mu\text{L}$ , 5.5 mmol, 5.5 equiv.), diphenyl phosphoric acid (25 mg, 0.1 mmol, 0.1 equiv.) and catalyst **4b** (75 mg, 0.2 mmol, 0.2 equiv.). The crude mixture was purified by flash column chromatography (hexane/EtOAc: 92:8 v/v) to afford the title compound as a colorless oil (157 mg, 56% yield, 93% ee). The ee (93%) was determined by HPLC analysis on a Daicel Chiralpak IC column: 85:15 hexane/*i*PrOH, flow rate 1.00 mL/min;  $\lambda = 254 \text{ nm}$ ;  $\tau_{\text{major}} = 14.3 \text{ min}$ ,  $\tau_{\text{minor}} = 15.6 \text{ min}$ .



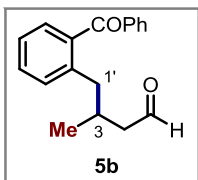

**(S)-4-(2-benzoylphenyl)-3-methylbutanal (5b).** Compound **5b** was prepared according to the general procedure A using 2-methylbenzophenone **1a** (36  $\mu$ L, 0.2 mmol, 1 equiv), *trans*-crotonaldehyde (91  $\mu$ L, 1.1 mmol, 5.5 equiv.), diphenyl phosphoric acid (10 mg, 0.04 mmol, 0.2 equiv) and catalyst **4b** (15 mg, 0.04 mmol, 0.2 equiv.). The crude mixture was purified by flash column chromatography (hexane/EtOAc: 90:10 v/v) to afford the title compound as a colorless oil (34 mg, 64% yield, 79% ee). TLC (hexane/EtOAc: 90/10 v/v):  $R_f$  = 0.32. The ee value (79%) was determined by HPLC analysis on a Daicel Chiralpak IC column 85:15 hexane:*i*PrOH flow rate 1.00 mL/min;  $\lambda$  = 254 nm;  $\tau_{\text{major}}$  = 11.9 min,  $\tau_{\text{minor}}$  = 12.8 min.  $[\alpha]_D^{26}$  = + 17.5 (c = 1.0 in  $\text{CHCl}_3$ ). HRMS calculated for  $[\text{C}_{18}\text{H}_{18}\text{O}_2+\text{Na}]^+$ : 289,1204; found 289,1205.

**$^1\text{H}$  NMR (400 MHz,  $\text{CDCl}_3$ )**  $\delta$  9.63 (dd,  $J$  = 2.6, 1.6 Hz, 1H, CHO), 7.86 – 7.78 (m, 2H, Ar), 7.61 (m, 1H, Ar), 7.52 – 7.42 (m, 3H, Ar), 7.36 – 7.27 (m, 3H, Ar), 2.72 (dd,  $J$  = 13.6, 7.1 Hz, 1H, H1' $\alpha$ ), 2.66 (dd,  $J$  = 13.7, 7.2 Hz, 1H, H1'  $\beta$ ), 2.44 – 2.33 (m, 2H, H2), 2.23 (td,  $J$  = 8.7, 8.1, 2.6 Hz, 1H, H3), 0.93 (d,  $J$  = 6.5 Hz, 3H,  $\text{CH}_3$ ).  **$^{13}\text{C}$  NMR (100 MHz,  $\text{CDCl}_3$ )**  $\delta$  202.5 (C=O), 198.5 (CHO), 139.3 (Cq Ar), 138.8 (Cq Ar), 137.8 (Cq, Ar), 133.3 (CH Ar), 131.0 (CH Ar), 130.3 (CH Ar), 130.2 (CH Ar x2), 129.0 (CH Ar), 128.5 (CH Ar x2), 125.7 (CH Ar), 50.3 ( $\text{CH}_2$ ), 40.2 ( $\text{CH}_2$ ), 30.3 (CH), 20.0 ( $\text{CH}_3$ ).

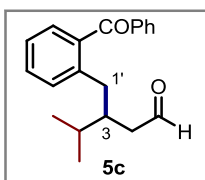

**(S)-3-(2-benzoylbenzyl)-4-methylpentanal (5c).** Compound **5c** was prepared according to the general procedure A using 2-methylbenzophenone **1a** (36  $\mu$ L, 0.2 mmol, 1 equiv.), *trans*-4-methyl-2-pentenal (128  $\mu$ L, 1.1 mmol, 5.5 equiv.), diphenyl phosphoric acid (10 mg, 0.04 mmol, 0.2 equiv.) and catalyst **4b** (15 mg, 0.04 mmol, 0.2 equiv.). The crude mixture was purified by flash column chromatography (hexane/EtOAc: 90:10 v/v) to afford the title compound as a colorless oil (31 mg, 53% yield, 96% ee). TLC (hexane/EtOAc: 90/10 v/v):  $R_f$  = 0.35. The ee value (96%) was determined by HPLC analysis on a Daicel Chiralpak IC column 90:10 hexane:*i*PrOH flow rate 1.00 mL/min;  $\lambda$  = 215 nm;  $\tau_{\text{major}}$  = 5.4 min,  $\tau_{\text{minor}}$  = 4.8 min.  $[\alpha]_D^{26}$  = + 29.8 (c = 1.0 in  $\text{CHCl}_3$ ). HRMS calculated for  $[\text{C}_{20}\text{H}_{22}\text{O}_2+\text{Na}]^+$ : 317,1517; found: 317,1515.

**$^1\text{H}$  NMR (400 MHz,  $\text{CDCl}_3$ )**  $\delta$  9.51 (t,  $J$  = 2.1 Hz, 1H, CHO), 7.85 – 7.80 (m, 2H, Ar), 7.65 – 7.58 (m, 1H, Ar), 7.52 – 7.41 (m, 3H, Ar), 7.36 – 7.27 (m, 3H, Ar), 2.89 (dd,  $J$  = 13.8, 5.8 Hz, 1H, H1' $\alpha$ ), 2.52 (dd,  $J$  = 13.8, 8.6 Hz, 1H, H1'  $\beta$ ), 2.29 (dd,  $J$  = 6.0, 2.2 Hz, 1H, H2 $\alpha$ ), 2.26 (dd,  $J$  = 6.4, 2.2 Hz, 1H, H2 $\beta$ ), 2.23 – 2.20 (m, 1H, H3), 1.68 (m, 1H, H4), 0.83 (d,  $J$  = 2.2 Hz, 3H,  $\text{CH}_3$ ), 0.81 (d,  $J$  = 2.2 Hz, 3H,  $\text{CH}_3$ ).  **$^{13}\text{C}$  NMR (100 MHz,  $\text{CDCl}_3$ )**  $\delta$  202.9 (C=O), 198.4 (CHO), 139.5 (Cq Ar), 1389.0 (Cq Ar), 137.7 (Cq Ar), 133.3 (CH Ar), 131.1 (CH Ar), 130.2 (CH Ar), 130.2 (CH Ar x2), 128.9 (CH Ar x2), 128.5 (CH Ar x2), 125.7 (CH Ar), 44.8 ( $\text{CH}_2$ ), 40.86 ( $\text{CH}_2$ ), 34.7 (CH), 30.0 (CH), 19.3 ( $\text{CH}_3$ ), 18.5 ( $\text{CH}_3$ ).

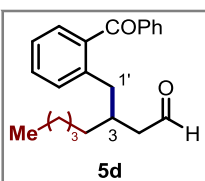

**(S)-3-(2-benzoylbenzyl)decanal (5d).** Compound **5d** was prepared according to the general procedure A, using 2-methylbenzophenone **1a** (36  $\mu$ L, 0.2 mmol, 1 equiv.), *trans*-2-decenal (202  $\mu$ L, 1.1 mmol, 5.5 equiv.), diphenyl phosphoric acid (10 mg, 0.04 mmol, 0.2 equiv.) and catalyst **4b** (15 mg, 0.04 mmol, 0.2 equiv.). The crude mixture was purified by flash column chromatography (hexane/EtOAc: 95:5 v/v) to afford the title compound as a colorless oil (37 mg, 53% yield, 82% ee). TLC (hexane/EtOAc: 90/10 v/v):  $R_f$  = 0.36. The ee value (82%) was determined by HPLC analysis on a Daicel Chiralpak IC column 90:10 hexane:*i*PrOH flow rate 1.00 mL/min;  $\lambda$  = 254 nm;  $\tau_{\text{major}}$  = 7.9 min,  $\tau_{\text{minor}}$  = 8.5 min.  $[\alpha]_D^{26}$  = + 24.8 (c = 0.4 in  $\text{CHCl}_3$ ). HRMS calculated for  $[\text{C}_{24}\text{H}_{30}\text{O}_2+\text{Na}]^+$ : 345,1830; found: 345,1833.

**<sup>1</sup>H NMR (400 MHz, CDCl<sub>3</sub>)** δ 9.57 (t, *J* = 2.1 Hz, 1H, CHO), 7.81 (m, 2H, CH Ar), 7.66 – 7.56 (m, 1H, Ar), 7.52 – 7.40 (m, 3H, Ar), 7.35 – 7.26 (m, 3H, Ar), 2.87 (dd, *J* = 13.8, 6.1 Hz, 1H, H1'α), 2.56 (dd, *J* = 13.7, 7.9 Hz, 1H, H1'β), 2.35 – 2.16 (m, 3H, H2+H3), 1.31 – 1.07 (m, 8H), 0.84 (t, *J* = 6.9 Hz, 3H, CH<sub>3</sub>). **<sup>13</sup>C NMR (100 MHz, CDCl<sub>3</sub>)** δ 202.8 (C=O), 198.4 (CHO), 139.4 (Cq Ar), 138.9 (Cq Ar), 137.7 (Cq Ar), 133.3 (CH Ar), 131.1 (CH Ar), 130.2 (CH Ar x2), 128.9 (CH Ar), 128.5 (CH Ar x2), 125.7 (CH Ar), 47.9 (CH<sub>2</sub>), 37.9 (CH<sub>2</sub>), 35.3 (CH<sub>2</sub>), 34.3 (CH<sub>2</sub>), 31.8 (CH), 26.2 (CH<sub>2</sub>), 22.5 (CH<sub>2</sub>), 14.0 (CH<sub>3</sub>).

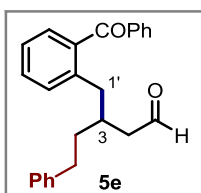

**(S)-3-(2-benzoylbenzyl)-5-phenylpentanal (5e).** Compound **5e** was prepared according to the general procedure A, using 2-methylbenzophenone **1a** (36 μL, 0.2 mmol, 1 equiv.), *trans*-5-phenylpentenal (176 mg, 1.1 mmol, 5.5 equiv.), diphenyl phosphoric acid (10 mg, 0.04 mmol, 0.2 equiv.) and catalyst **4b** (15 mg, 0.04 mmol, 0.2 equiv.). The crude mixture was purified by flash column chromatography (hexane/EtOAc: 90:10 v/v) to afford the title compound as a colorless oil (41 mg, 57% yield, 80% ee). TLC (hexane/EtOAc: 90/10 v/v): *R<sub>f</sub>* =

0.33. The *ee* value (80%) was determined by HPLC analysis on a Daicel Chiralpak IC column 85:15 hexane:*i*PrOH flow rate 0.90 mL/min; λ = 254 nm; τ<sub>major</sub> = 12.6 min, τ<sub>minor</sub> = 13.9 min. [α]<sub>D</sub><sup>26</sup> = +98.6 (c = 1.0 in CHCl<sub>3</sub>). HRMS calculated for [C<sub>25</sub>H<sub>24</sub>O<sub>2</sub>+Na]<sup>+</sup>: 379,1674; found: 379,1677.

**<sup>1</sup>H NMR (400 MHz, CDCl<sub>3</sub>)** δ 9.58 (t, *J* = 2.0 Hz, 1H, CHO), 7.81 (m, 2H, Ar), 7.66 – 7.57 (m, 1H, Ar), 7.51 – 7.43 (m, 3H, Ar), 7.38 – 7.29 (m, 3H, Ar), 7.27 – 7.20 (m, 2H, Ar), 7.19 – 7.12 (m, 1H, Ar), 7.09 (m, 2H, Ar), 2.97 (dd, *J* = 13.8, 6.0 Hz, 1H, H1'α), 2.66 (dd, *J* = 13.8, 8.0 Hz, 1H, H1'β), 2.60 – 2.49 (m, 2H, H2), 2.39 – 2.35 (m, 1H, H3), 2.31 (m, 2H, H5), 1.64 (m, 2H, H4). **<sup>13</sup>C NMR (100 MHz, CDCl<sub>3</sub>)** δ 202.4(C=O), 198.4(CHO), 141.8 (Cq Ar), 139.2 (Cq Ar), 138.9 (Cq Ar), 137.7 (Cq Ar), 133.3 (CH Ar), 131.1 (CH Ar), 130.3 (CH Ar), 130.2 (CH Ar x2), 130.1 (CH Ar), 129.0 (CH Ar), 128.5 (CH Ar x2), 128.3 (CH Ar x2), 128.2 (CH Ar x2), 125.8 (CH Ar), 47.8 (CH<sub>2</sub>), 37.7(CH<sub>2</sub>), 36.1 (CH<sub>2</sub>), 35.1 (CH<sub>2</sub>), 33.0 (CH).

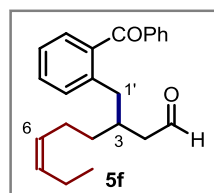

**(S,Z)-3-(2-benzoylbenzyl)non-6-enal (5f).** Compound **5f** was prepared according to the general procedure A, using 2-methylbenzophenone **1a** (36 μL, 0.2 mmol, 1 equiv.), *trans*-2,*cis*-6-nonadienal (177 μL, 1.1 mmol, 5.5 equiv.), diphenyl phosphoric acid (10 mg, 0.04 mmol, 0.2 equiv.) and catalyst **4b** (15 mg, 0.04 mmol, 0.2 equiv.). The crude mixture was purified by flash column chromatography (hexane/EtOAc: 95:5 v/v) to afford the title compound as a colorless oil (37 mg, 55% yield, 89% ee). TLC (hexane/EtOAc: 90/10 v/v): *R<sub>f</sub>*

= 0.33. The *ee* value (89%) was determined by HPLC analysis on a Daicel Chiralpak IC column 91:9 hexane:*i*PrOH flow rate 0.50 mL/min; λ = 254 nm; τ<sub>major</sub> = 20.1 min, τ<sub>minor</sub> = 22.3 min. [α]<sub>D</sub><sup>26</sup> = +100.2 (c = 1.0 in CHCl<sub>3</sub>). HRMS calculated for [C<sub>23</sub>H<sub>26</sub>O<sub>2</sub>+Na]<sup>+</sup>: 357,1830; found: 357,1832.

**<sup>1</sup>H NMR (400 MHz, CDCl<sub>3</sub>)** δ 9.58 (t, *J* = 2.1 Hz, 1H, CHO), 7.86 – 7.77 (m, 2H, Ar), 7.65 – 7.56 (m, 1H, Ar), 7.53 – 7.39 (m, 3H, Ar), 7.36 – 7.26 (m, 3H, Ar), 5.38 – 5.26 (m, 1H, H6), 5.24 – 5.11 (m, 1H, H7), 2.86 (dd, *J* = 13.8, 6.0 Hz, 1H, H1'α), 2.62 (dd, *J* = 13.7, 7.7 Hz, 1H H1'β), 2.37 – 2.20 (m, 3H, H2+H3), 2.05 – 1.88 (m, 4H, H5+H8), 1.40 – 1.29 (m, 2H, H4), 0.92 (t, *J* = 7.5 Hz, 3H, CH<sub>3</sub>). **<sup>13</sup>C NMR (100 MHz, CDCl<sub>3</sub>)** δ 202.6 (C=O), 198.4 (CHO), 139.2 (Cq Ar), 138.9 Cq Ar), 137.7 (Cq Ar), 133.3 (CH Ar), 132.1 (CH C=C), 131.0 (CH Ar), 130.3 (CH Ar), 130.2 (CH Ar x2), 128.9 (CH Ar), 128.5 (CH Ar x2), 128.2 (CH C=C), 125.8 (CH Ar), 47.8 (CH<sub>2</sub>), 37.8 (CH<sub>2</sub>), 35.0 (CH<sub>2</sub>), 34.3 (CH), 24.3 (CH<sub>2</sub>), 20.5 (CH<sub>2</sub>), 14.3 (CH<sub>3</sub>).

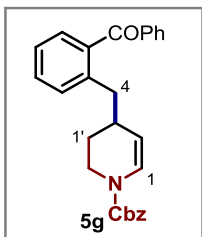

**Benzyl (R)-4-(2-benzoylbenzyl)-dihydropyridine-1(2H)-carboxylate (5g).**

Compound **5g** was prepared according to the general procedure A, using 2-methylbenzophenone **1a** (36  $\mu$ L, 0.2 mmol, 1 equiv.), *trans*-benzyl-(5-oxopentenyl)carbamate (257 mg, 1.1 mmol, 5.5 equiv.), diphenyl phosphoric acid (10 mg, 0.04 mmol, 0.2 equiv.) and catalyst **4b** (15 mg, 0.04 mmol, 0.2 equiv.). The crude mixture was purified by flash column chromatography (hexane/EtOAc: 80:20 v/v) to afford the title compound as a colorless oil (41 mg, 50% yield, 89% ee). TLC (hexane/EtOAc: 85:15 v/v):  $R_f$  = 0.35. The ee (89%) was determined by HPLC analysis on a Daicel Chiralpak ID-3 column 87:13 hexane:*i*PrOH

flow rate 0.90 mL/min;  $\lambda$  = 254 nm;  $\tau_{\text{major}}$  = 15.1 min,  $\tau_{\text{minor}}$  = 13.7 min. HRMS calculated for  $[\text{C}_{27}\text{H}_{25}\text{NO}_3+\text{Na}]^+$ : 434,1732; found: 434,1733.

$^1\text{H NMR}$  (400 MHz,  $\text{CDCl}_3$ )  $\delta$  7.83 – 7.76 (m, 2H, Ar), 7.65 – 7.57 (m, 1H, Ar), 7.50 – 7.43 (m, 3H, Ar), 7.41 – 7.29 (m, 8H, Ar), 6.79 (dd,  $J$  = 36.4, 8.4 Hz, 1H, H1), 5.18 (s, 2H,  $\text{CH}_2$  Cbz), 4.74 (m, H2), 3.79 – 3.66 (m, 1H, H2' $\alpha$ ), 3.39 (ddd,  $J$  = 12.9, 9.1, 3.6 Hz, 1H, H2' $\beta$ ), 2.82 – 2.63 (m, 2H, H4), 2.46 (m, 1H, H3), 1.78 (m, 1H, H1' $\alpha$ ), 1.57 – 1.43 (m, 1H, H1' $\alpha$ ).  $^{13}\text{C NMR}$  (100 MHz,  $\text{CDCl}_3$ )  $\delta$  198.5 (CHO), 153.4 (Cq Ar), 139.0 (Cq Ar), 138.8 (Cq Ar), 137.8 (Cq Ar), 136.3 (CH Ar), 133.3 (CH Ar), 131.1 (CH Ar), 130.1 (CH Ar x2), 129.0 (CH Ar), 128.5 (CH Ar x2), 128.5 (CH Ar x2), 128.1 (CH Ar), 128.0 (CH Ar), 125.6 (CH Ar), 124.4 (CH), 110.1 (CH), 67.5 ( $\text{CH}_2$  Cbz), 40.6 ( $\text{CH}_2$ ), 39.2 ( $\text{CH}_2$ ), 33.7 (CH), 27.4 ( $\text{CH}_2$ ).

The title compound **5g** is directly obtained from the corresponding  $\beta$ -benzylated aldehyde (not isolated) spontaneously undergoing a cyclization/condensation sequence involving the amine and the aldehyde moieties (Scheme S2).

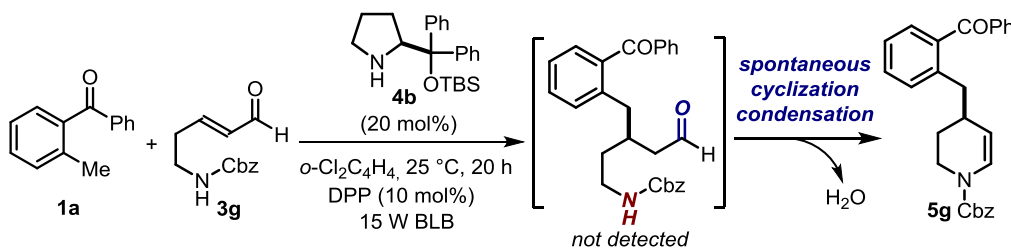

**Scheme S2.** Reaction mechanism for the formation of the cyclic compound **5g**.

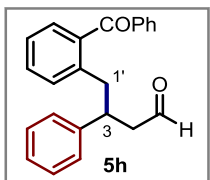

**(S)-4-(2-benzoylphenyl)-3-phenylbutanal (5h).**

Compound **5h** was prepared according to the general procedure B, using 2-methylbenzophenone **1a** (72  $\mu$ L, 0.4 mmol, 2 equiv.), *trans*-cinnamaldehyde (25  $\mu$ L, 0.2 mmol, 1 equiv.), diphenyl phosphoric acid (10 mg, 0.04 mmol, 0.2 equiv.) and catalyst **4a** (13 mg, 0.04 mmol, 0.2 equiv.). The crude mixture was purified by flash column chromatography (hexane/EtOAc: 95:5 v/v) to afford the title compound as a

colourless oil (37 mg, 57% yield, 94% ee). TLC: (hexane/EtOAc: 90:10 v/v),  $R_f$  = 0.31. The ee (94%) was determined by UPC<sup>2</sup> analysis on a Daicel Chiralpak IC column using a gradient method (from 100%  $\text{CO}_2$  to 60:40  $\text{CO}_2$ :ACN), flow rate 2.00 mL/min;  $\lambda$  = 247 nm;  $\tau_{\text{major}}$  = 3.17 min,  $\tau_{\text{minor}}$  = 3.53 min.  $[\alpha]_{\text{D}}^{26} = +12.6$  ( $c$  = 0.5 in  $\text{CHCl}_3$ ). HRMS calculated for  $[\text{C}_{23}\text{H}_{20}\text{O}_2+\text{Na}]^+$ : 351,1361; found: 351,1365.

$^1\text{H NMR}$  (500 MHz,  $\text{CDCl}_3$ )  $\delta$  9.56 (t,  $J$  = 2.1 Hz, 1H, CHO), 7.75 – 7.68 (m, 2H, Ar), 7.64 – 7.57 (m, 1H, Ar), 7.50 – 7.42 (m, 2H, Ar), 7.37 (m, 2H, Ar), 7.31 – 7.23 (m, 2H, Ar), 7.18 (m, 3H, Ar), 7.15 – 7.10 (m, 1H, Ar), 7.10 – 7.05 (m, 2H, Ar), 3.56 (p,  $J$  = 7.6 Hz, 1H, CH H3), 3.15 – 2.99 (m, 2H,  $\text{CH}_2$  H1'), 2.85 – 2.67 (m, 2H,  $\text{CH}_2$  H2).  $^{13}\text{C NMR}$  (125 MHz,  $\text{CDCl}_3$ )  $\delta$  201.6 (C=O), 198.3 (CHO), 142.8 (Cq Ar), 138.8 (Cq Ar), 138.6 (Cq Ar), 137.8 (Cq Ar), 133.2 (CH Ar), 131.2 (CH

Ar), 130.3 (CH Ar x2), 130.2 (CH Ar), 129.2 (CH Ar), 128.6 (CH Ar x2), 128.4 (CH Ar x2), 127.5 (CH Ar x2), 126.7 (CH Ar), 125.6 (CH Ar), 49.2 (CH), 42.0 (CH<sub>2</sub>), 40.2 (CH<sub>2</sub>).

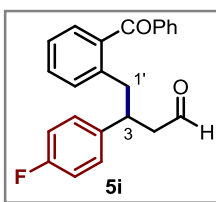

**(S)-4-(2-benzoylphenyl)-3-(4-fluorophenyl)butanal (5i).** Compound **5i** was prepared according to the general procedure B, using 2-methylbenzophenone **1a** (72  $\mu$ L, 0.4 mmol, 2 equiv.), *trans*-4-fluorocinnamaldehyde (23  $\mu$ L, 0.2 mmol, 1 equiv.), diphenyl phosphoric acid (10 mg, 0.04 mmol, 0.2 equiv.) and catalyst **4a** (13 mg, 0.04 mmol, 0.2 equiv.). The crude mixture was purified by flash column chromatography (hexane/EtOAc: 95:5 v/v) to afford the title compound as a colourless oil (36 mg, 52% yield, 89% ee). TLC:

(hexane/EtOAc: 90:10 v/v),  $R_f = 0.31$ . The ee (89%) was determined by UPC<sup>2</sup> analysis on a Daicel Chiralpak IC column using a gradient method (from 100% CO<sub>2</sub> to 60:40 CO<sub>2</sub>:ACN), flow rate 2.00 mL/min;  $\lambda = 247$  nm;  $\tau_{\text{major}} = 3.96$  min,  $\tau_{\text{minor}} = 3.50$  min.  $[\alpha]_D^{26} = +8.8$  ( $c = 0.5$  in CHCl<sub>3</sub>). HRMS calculated for [C<sub>23</sub>H<sub>19</sub>FO<sub>2</sub>+Na]<sup>+</sup>: 369,1267; found: 369,1269.

**<sup>1</sup>H NMR (400 MHz, Chloroform-*d*)**  $\delta$  9.57 (t,  $J = 1.9$  Hz, 1H, CHO), 7.71 – 7.65 (m, 2H, Ar), 7.64 – 7.57 (m, 1H, Ar), 7.45 (m, 2H, Ar), 7.38 (m, 1H, Ar), 7.31 – 7.23 (m, 3H, Ar), 7.17 (m, 1H, Ar), 7.05 – 6.96 (m, 2H, Ar), 6.88 – 6.78 (m, 2H, Ar), 3.56 (p,  $J = 7.5$  Hz, 1H, H3), 3.13 – 2.98 (m, 2H, H1'), 2.75 (m, 2H, H2). **<sup>13</sup>C NMR (125 MHz, CDCl<sub>3</sub>)**  $\delta$  201.2 (C=O), 198.2 (CHO), 138.7, 138.5, 138.5, 137.6, 133.2 (CH Ar), 131.2 (CH Ar), 130.3 (CH Ar), 130.2 (CH Ar x2), 129.2 (CH Ar), 129.0 (CH Ar), 129.0 (CH Ar), 128.4 (CH Ar x2), 125.7, 115.4, 115.3, 49.5 (CH), 41.4 (CH<sub>2</sub>), 40.2 (CH<sub>2</sub>).

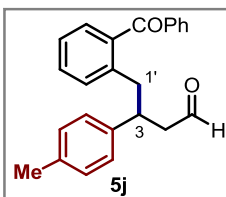

**(S)-4-(2-benzoylphenyl)-3-(p-tolyl)butanal (5j).** Compound **5j** was prepared according to the general procedure B, using 2-methylbenzophenone **1a** (72  $\mu$ L, 0.4 mmol, 2 equiv.), *trans*-4-methylcinnamaldehyde (29 mg, 0.2 mmol, 1 equiv.), diphenyl phosphoric acid (10 mg, 0.04 mmol, 0.2 equiv.) and catalyst **4a** (13 mg, 0.04 mmol, 0.2 equiv.). The crude mixture was purified by flash column chromatography (hexane/EtOAc: 95:5 v/v) to afford the title compound as a colourless oil (45 mg, 66% yield, 88% ee). TLC:

(hexane/EtOAc: 90:10 v/v),  $R_f = 0.31$ . The ee (88%) was determined by UPC<sup>2</sup> analysis on a Daicel Chiralpak IC column using a gradient method (from 100% CO<sub>2</sub> to 60:40 CO<sub>2</sub>:ACN), flow rate 2.00 mL/min;  $\lambda = 247$  nm;  $\tau_{\text{major}} = 3.23$  min,  $\tau_{\text{minor}} = 3.71$  min. HRMS calculated for [C<sub>24</sub>H<sub>22</sub>O<sub>2</sub>+Na]<sup>+</sup>: 365,1517; found: 365,1520.

**<sup>1</sup>H NMR (500 MHz, CDCl<sub>3</sub>)**  $\delta$  9.55 (t,  $J = 2.1$  Hz, 1H, CHO), 7.73 – 7.65 (m, 2H, Ar), 7.62 – 7.57 (m, 1H, Ar), 7.48 – 7.41 (m, 2H), 7.38 (m, 1H, Ar), 7.29 – 7.18 (m, 3H), 7.03 – 6.89 (m, 4H), 3.50 (ddd,  $J = 15.1, 8.1, 6.9$  Hz, 1H, H3), 3.12 (dd,  $J = 13.7, 8.2$  Hz, 1H, H1' $\alpha$ ), 3.03 (dd,  $J = 13.6, 7.0$  Hz, 1H, H1' $\beta$ ), 2.78 – 2.67 (m, 2H, H2), 2.24 (s, 3H, CH<sub>3</sub>). **<sup>13</sup>C NMR (125 MHz, CDCl<sub>3</sub>)**  $\delta$  201.8 (C=O), 198.3 (CHO), 139.7 (Cq Ar), 139.0 (Cq Ar), 138.6 (Cq Ar), 137.7 (Cq Ar), 136.2 (Cq Ar), 133.1 (CH Ar), 131.2 (CH Ar), 130.3 (CH Ar x2), 130.2 (CH Ar), 129.3 (CH Ar x2), 129.1 (CH Ar), 128.3 (CH Ar x2), 127.4 (CH Ar x2), 125.5 (CH Ar), 49.4 (CH), 41.8 (CH<sub>2</sub>), 40.1 (CH<sub>2</sub>), 21.0 (CH<sub>3</sub>).

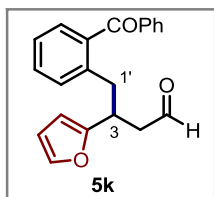

**(S)-4-(2-benzoylphenyl)-3-(furan-2-yl)butanal (5k).** Compound **5k** was prepared according to the general procedure B, using 2-methylbenzophenone **1a** (72  $\mu$ L, 0.4 mmol, 2 equiv.), *trans*-3-(furan-2-yl)acrolein (24.5 mg, 0.2 mmol, 1 equiv.), diphenyl phosphoric acid (10 mg, 0.04 mmol, 0.2 equiv.) and catalyst **4a** (13 mg, 0.04 mmol, 0.2 equiv.). The crude mixture was purified by flash column chromatography (hexane/EtOAc: 95:5 v/v) to afford the title compound as a colourless oil (33 mg, 56% yield, 90% ee). TLC:

(hexane/EtOAc: 90:10 v/v),  $R_f = 0.3$ . The ee (90%) was determined by UPC<sup>2</sup> analysis on a Daicel Chiralpak IC column using a gradient method (from 100% CO<sub>2</sub> to 60:40 CO<sub>2</sub>:ACN), flow rate 2.00 mL/min;  $\lambda = 247$  nm;  $\tau_{\text{major}} = 2.86$  min,  $\tau_{\text{minor}} = 2.99$  min.  $[\alpha]_D^{26} = 17.6$  ( $c = 0.35$  in CHCl<sub>3</sub>). HRMS calculated for [C<sub>21</sub>H<sub>18</sub>O<sub>3</sub>+Na]<sup>+</sup>: 341,1154; found: 341,1155.

**<sup>1</sup>H NMR (400 MHz, Chloroform-*d*)**  $\delta$  9.63 (t,  $J = 2.0$  Hz, 1H, CHO), 7.84 – 7.74 (m, 2H, Ar), 7.66 – 7.58 (m, 1H, Ar), 7.53 – 7.45 (m, 2H, Ar), 7.43 – 7.24 (m, 5H, Ar), 7.13 (m, 1H, Ar), 6.19 (dd,  $J = 3.2, 1.8$  Hz, 1H, HetAr), 5.90 (dt,  $J = 3.3, 0.7$  Hz, 1H, HetAr), 3.68 (p,  $J = 7.9$  Hz, 1H, H3), 3.16 (dd,  $J = 13.6, 8.1$  Hz, 1H, H1' $\alpha$ ), 3.01 (dd,  $J = 13.6, 6.9$  Hz, 1H, H1' $\beta$ ), 2.75 (ddd,  $J = 16.8, 8.3, 2.2$  Hz, 1H, H2 $\alpha$ ), 2.67 (ddd,  $J = 16.8, 6.0, 1.8$  Hz, 1H, H2 $\beta$ ). **<sup>13</sup>C NMR (125 MHz, CDCl<sub>3</sub>)**  $\delta$  204.1 (C=O), 201.2 (CHO), 141.4 (CH Ar), 138.6 (Cq Ar), 138.3 (Cq Ar), 137.7 (Cq Ar), 133.2 (CH Ar), 131.1 (CH Ar), 130.3 (CH Ar x2), 130.3 (CH Ar), 129.2 (CH Ar), 128.4 (CH Ar x2), 125.8 (Cq HetAr), 110.0 (CH HetAr), 106.2 (CH HetAr), 100.0 (CH HetAr), 46.9 (CH), 37.5 (CH<sub>2</sub>), 35.4 (CH<sub>2</sub>).

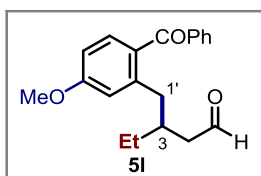

**(S)-3-(2-benzoyl-5-methoxybenzyl)pentanal (5l)**. Compound **5l** was prepared according to the general procedure A, using 2-methyl-4-methoxybenzophenone (45.3 mg, 0.2 mmol, 1 equiv.), *trans*-2-pentenal (108  $\mu$ L, 1.1 mmol, 5.5 equiv.), diphenyl phosphoric acid (10 mg, 0.04 mmol, 0.2 equiv.) and catalyst **4b** (15 mg, 0.04 mmol, 0.2 equiv.). The crude mixture was purified by flash column chromatography

(hexane/EtOAc: 85:15 v/v) to afford the title compound as a colorless oil (32 mg, 52% yield, 90% ee). TLC (hexane/EtOAc: 85/15 v/v):  $R_f = 0.34$ . The ee value (90%) was determined by HPLC analysis on a Daicel Chiralpak IC column 55:42:3 hexane:*i*PrOH:DCM flow rate 0.90 mL/min;  $\lambda = 254$  nm;  $\tau_{\text{major}} = 10.8$  min,  $\tau_{\text{minor}} = 11.8$  min.  $[\alpha]_D^{26} = +135.7$  ( $c = 1.0$  in CHCl<sub>3</sub>). HRMS calculated for [C<sub>22</sub>H<sub>22</sub>O<sub>3</sub>+Na]<sup>+</sup>: 333,1467; found: 333,1466.

**<sup>1</sup>H NMR (500 MHz, CDCl<sub>3</sub>)**  $\delta$  9.63 (t,  $J = 2.3$  Hz, 1H, CHO), 7.81 – 7.75 (m, 2H, Ar), 7.62 – 7.57 (m, 1H), 7.52 – 7.43 (m, 2H, Ar), 7.34 (d,  $J = 8.5$  Hz, 1H, Ar), 6.86 (d,  $J = 2.6$  Hz, 1H, Ar), 6.79 (dd,  $J = 8.5, 2.6$  Hz, 1H, Ar), 3.89 (s, 3H, OMe), 2.97 (dd,  $J = 13.5, 6.6$  Hz, 1H, H1' $\alpha$ ), 2.68 (dd,  $J = 13.6, 8.2$  Hz, 1H, H1' $\beta$ ), 2.35–2.32 (m, 2H, H2), 2.24 (dq,  $J = 8.2, 6.4$  Hz, 1H, H3), 1.46 – 1.30 (m, 2H, H4), 0.87 (t,  $J = 7.4$  Hz, 3H, CH<sub>3</sub>). **<sup>13</sup>C NMR (125 MHz, CDCl<sub>3</sub>)**  $\delta$  202.9 (C=O), 197.7 (CHO), 161.2 (Cq Ar), 143.0 (Cq Ar), 138.8 (Cq Ar), 132.7 (CH Ar), 132.4 (CH Ar), 131.0 (Cq Ar), 130.1 (CH Ar), 128.3 (CH Ar), 117.1 (CH Ar), 110.4 (CH Ar), 55.4 (CH<sub>3</sub> OMe), 47.5 (CH<sub>2</sub>), 37.8 (CH<sub>2</sub>), 36.8 (CH<sub>2</sub>), 26.9 (CH), 11.0 (CH<sub>3</sub>).

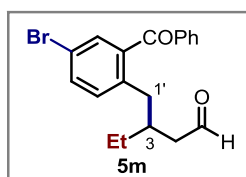

**(S)-3-(2-benzoylbenzyl)pentanal (5m)**. Compound **5m** was prepared according to the general procedure A, using 2-methyl-5-bromobenzophenone (55 mg, 0.2 mmol, 1 equiv.), *trans*-2-pentenal (108  $\mu$ L, 1.1 mmol, 5.5 equiv.), diphenyl phosphoric acid (10 mg, 0.04 mmol, 0.2 equiv.) and catalyst **4b** (15 mg, 0.04 mmol, 0.2 equiv.). The crude mixture was purified by flash column chromatography (hexane/EtOAc: 85:15 v/v) to

afford the title compound as a colorless oil (48 mg, 66% yield, 94% ee). TLC (hexane/EtOAc: 85/15 v/v):  $R_f = 0.34$ . The ee value (94%) was determined by HPLC analysis on a Daicel Chiralpak IA column 96:2:2 hexane:*i*PrOH:DCM flow rate 0.70 mL/min;  $\lambda = 254$  nm;  $\tau_{\text{major}} = 12.0$  min,  $\tau_{\text{minor}} = 12.5$  min.  $[\alpha]_D^{26} = +168.6$  ( $c = 0.6$  in CHCl<sub>3</sub>). HRMS calculated for [C<sub>19</sub>H<sub>29</sub>BrO<sub>2</sub>+Na]<sup>+</sup>: 381,0466; found: 381,0461.

**<sup>1</sup>H NMR (400 MHz, CDCl<sub>3</sub>)**  $\delta$  9.60 (t,  $J = 2.1$  Hz, 1H, CHO), 7.80 (m, 2H, Ar), 7.69 – 7.39 (m, 5H, Ar), 7.30 – 7.18 (m, 1H, Ar), 2.74 (dd,  $J = 13.8, 6.8$  Hz, 1H, H1' $\alpha$ ), 2.51 (dd,  $J = 13.8, 6.9$  Hz, 1H, H1' $\beta$ ), 2.35 – 2.25 (m, 2H, H2 $\alpha$ +H2 $\beta$ ), 2.14 (dt,  $J = 13.5, 6.7$  Hz, 1H, H3), 1.41 – 1.18 (m, 2H, H4 $\alpha$ +H4 $\beta$ ), 0.81 (t,  $J = 7.4$  Hz, 3H, CH<sub>3</sub>). **<sup>13</sup>C NMR (100 MHz, CDCl<sub>3</sub>)**  $\delta$  202.4 (C=O), 196.7

(CHO), 140.82 (Cq Ar), 138.2 (Cq Ar), 137.0 (Cq Ar), 133.8 (CH Ar) 133.1 (CH Ar), 132.7 (CH Ar x2), 131.3 (CH Ar), 130.1 (CH Ar x2), 128.7 (CH Ar x2), 119.6 (CH Ar), 47.3 (CH<sub>2</sub>), 36.9 (CH<sub>2</sub>), 36.5 (CH), 26.6 (CH<sub>2</sub>), 10.9 (CH<sub>3</sub>).

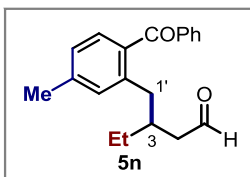

**(S)-3-(2-benzoyl-5-methylbenzyl)pentanal (5n).** Compound **5n** was prepared according to the general procedure A, using 2,4-dimethylbenzophenone (44 mg, 0.2 mmol, 1 equiv.), *trans*-2-pentenal (108  $\mu$ L, 1.1 mmol, 5.5 equiv.), diphenyl phosphoric acid (10 mg, 0.04 mmol, 0.2 equiv.) and catalyst **4b** (15 mg, 0.04 mmol, 0.2 equiv.). The crude mixture was purified by flash column chromatography (hexane/EtOAc: 90:10 v/v) to afford the title compound as a colorless oil (37 mg, 63% yield, 90% ee). TLC: (hexane/EtOAc: 90:10 v/v),  $R_f = 0.30$ . The ee (90%) was determined by HPLC analysis on a Daicel Chiralpak IC column 85:15 hexane:*i*PrOH flow rate 1.00 mL/min;  $\lambda = 254$  nm;  $\tau_{\text{major}} = 11.6$  min,  $\tau_{\text{minor}} = 16.7$  min.  $[\alpha]_D^{26} = +75.6$  ( $c = 0.7$  in CHCl<sub>3</sub>). HRMS calculated for [C<sub>20</sub>H<sub>22</sub>O<sub>2</sub>+Na]<sup>+</sup>: 317,1517; found: 317,1519.

**<sup>1</sup>H NMR (400 MHz, CDCl<sub>3</sub>)**  $\delta$  9.60 (t,  $J = 2.2$  Hz, 1H, CHO), 7.83 – 7.76 (m, 2H, Ar), 7.63 – 7.56 (m, 1H, Ar), 7.47 (dd,  $J = 8.3, 7.1$  Hz, 2H, Ar), 7.30 – 7.22 (m, 1H, Ar), 7.16 – 7.05 (m, 2H, Ar), 2.87 (dd,  $J = 13.6, 6.5$  Hz, 1H, H1' $\alpha$ ), 2.58 (dd,  $J = 13.6, 8.2$  Hz, 1H, H1' $\beta$ ), 2.42 (s, 3H, Me), 2.31 (m, 2H, H2), 2.20 (dp,  $J = 8.3, 6.3$  Hz, 1H, H3), 1.44 – 1.25 (m, 2H, H4), 0.84 (t,  $J = 7.4$  Hz, 3H, CH<sub>3</sub>). **<sup>13</sup>C NMR (100 MHz, CDCl<sub>3</sub>)**  $\delta$  203.0 (C=O), 198.4 (CHO), 140.6 (Cq Ar), 139.8 (Cq Ar), 138.2 (Cq Ar), 135.9 (Cq Ar), 133.0 (CH Ar), 131.9 (CH Ar), 130.1 (CH Ar x2), 129.6 (CH Ar), 128.4 (CH Ar x2), 126.3 (CH Ar), 47.5 (CH<sub>2</sub>), 37.5 (CH<sub>2</sub>), 36.8 (CH), 26.9 (CH<sub>3</sub>), 21.5 (CH<sub>2</sub>), 11.0 (CH<sub>3</sub>).

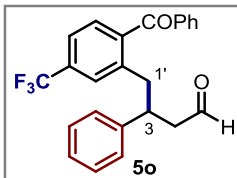

**(S)-4-(2-benzoyl-5-(trifluoromethyl)phenyl)-3-phenylbutanal (5o).** Compound **5o** was prepared according to the general procedure B using 4-(trifluoromethyl)-2-methylbenzophenone (106mg, 0.4 mmol, 2 equiv.), *trans*-cinnamaldehyde (25  $\mu$ L, 0.2 mmol, 1 equiv.), diphenyl phosphoric acid (10 mg, 0.04 mmol, 0.2 equiv.) and catalyst **4a** (13 mg, 0.04 mmol, 0.2 equiv.). The crude mixture was purified by flash column chromatography (hexane/EtOAc: 95:5 v/v) to afford the title compound as a colourless oil (46 mg, 58% yield, 97% ee). TLC: (hexane/EtOAc: 90:10 v/v),  $R_f = 0.33$ . The ee (97%) was determined by analysis on a Daicel Chiralpak IC column using a gradient method (from 100% CO<sub>2</sub> to 60:40 CO<sub>2</sub>:ACN), flow rate 2.00;  $\lambda = 247$  nm;  $\tau_{\text{major}} = 2.27$  min,  $\tau_{\text{minor}} = 2.51$  min.  $[\alpha]_D^{26} = 40.3$  ( $c = 0.28$  in CHCl<sub>3</sub>). HRMS calculated for [C<sub>24</sub>H<sub>19</sub>F<sub>3</sub>O<sub>2</sub>+Na]<sup>+</sup>: 419,1235; found: 419,1237.

**<sup>1</sup>H NMR (500 MHz, CDCl<sub>3</sub>)**  $\delta$  9.60 (t,  $J = 1.9$  Hz, 1H, CHO), 7.71 – 7.66 (m, 2H, Ar), 7.66 – 7.61 (m, 1H, Ar), 7.53 – 7.45 (m, 3H, Ar), 7.42 – 7.34 (m, 1H, Ar), 7.32 – 7.30 (m, 1H, Ar), 7.23 – 7.11 (m, 3H, Ar), 7.05 – 7.01 (m, 2H, Ar), 3.53 (tt,  $J = 8.5, 6.5$  Hz, 1H, H3), 3.10 (dd,  $J = 13.8, 6.4$  Hz, 1H, H1' $\alpha$ ), 3.05 (dd,  $J = 13.7, 8.9$  Hz, 1H, H1' $\beta$ ), 2.82 (ddd,  $J = 16.9, 8.1, 2.0$  Hz, 1H, H2 $\alpha$ ), 2.75 (ddd,  $J = 16.9, 6.7, 1.8$  Hz, 1H, H2 $\beta$ ). **<sup>13</sup>C NMR (125 MHz, CDCl<sub>3</sub>)**  $\delta$  201.0 (C=O), 197.1 (CHO), 141.9 (Cq Ar), 139.4 (Cq Ar), 136.8 (Cq Ar), 133.8 (CH Ar), 130.2 (CH Ar x2), 129.1 (Cq Ar), 128.9 (Cq Ar), 128.7 (CH Ar x2), 128.6 (CH Ar x2), 127.9, 127.5 (CH Ar x2), 127.0 (CH Ar), 125.6, 122.6, 49.2 (CH), 41.7 (CH<sub>2</sub>), 40.0 (CH<sub>2</sub>).

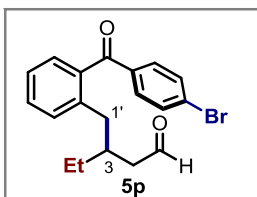

**(S)-3-(2-(4-bromobenzoyl)benzyl)pentanal (5p).** Compound **5p** was prepared according to the general procedure A, using (4-bromophenyl)(o-tolyl)methanone (55 mg, 0.2 mmol, 1 equiv.), *trans*-2-pentenal (108  $\mu$ L, 1.1 mmol, 5.5 equiv.), diphenyl phosphoric acid (10 mg, 0.04 mmol, 0.2 equiv.) and catalyst **4b** (15 mg, 0.04 mmol, 0.2 equiv.). The crude mixture

was purified by flash column chromatography (hexane/EtOAc: 90:10 v/v) to afford the title compound as a colorless oil (44 mg, 61% yield, 91% ee). TLC: (hexane/EtOAc: 90:10 v/v),  $R_f = 0.32$ . The ee (91%) was determined by HPLC analysis on a Daicel Chiralpak IC column 97:03 hexane:*i*PrOH flow rate 0.80 mL/min;  $\lambda = 254$  nm;  $\tau_{\text{major}} = 14.0$  min,  $\tau_{\text{minor}} = 15.8$  min.  $[\alpha]_{\text{D}}^{26} = +146.7$  ( $c = 0.5$  in  $\text{CHCl}_3$ ). HRMS calculated for  $[\text{C}_{19}\text{H}_{19}\text{BrO}_2 + \text{Na}]^+$ : 381,0466; found: 381,0466.

$^1\text{H NMR}$  (400 MHz,  $\text{CDCl}_3$ )  $\delta$  9.60 (t,  $J = 2.1$  Hz, 1H, CHO), 7.71 – 7.65 (m, 2H, Ar), 7.65 – 7.58 (m, 2H, Ar), 7.46 (m, 1H, Ar), 7.37 – 7.26 (m, 3H, Ar), 2.85 (dd,  $J = 13.7, 6.6$  Hz, 1H, H1' $\alpha$ ), 2.57 (dd,  $J = 13.7, 8.2$  Hz, 1H, H1' $\beta$ ), 2.34 – 2.27 (m, 2H, H2), 2.18 (m, 1H, H3), 1.40 – 1.24 (m, 2H, H4), 0.84 (t,  $J = 7.4$  Hz, 3H,  $\text{CH}_3$ ).  $^{13}\text{C NMR}$  (100 MHz,  $\text{CDCl}_3$ )  $\delta$  202.6 (C=O), 197.3 (CHO), 139.5 (Cq Ar), 138.3 (Cq Ar), 136.5 (Cq Ar), 131.9 (CH Ar x2), 131.6 (CH Ar x2), 131.2 (CH Ar), 130.5 (CH Ar), 128.8 (CH Ar), 128.6 (Cq Ar), 125.8 (CH Ar), 47.5 ( $\text{CH}_2$ ), 37.4 ( $\text{CH}_2$ ), 36.8 ( $\text{CH}_2$ ), 26.8 (CH), 11.0 ( $\text{CH}_3$ ).

Compound **5p** was also obtained using a 1 mmol scale procedure using (4-bromophenyl)(*o*-tolyl)methanone **5p** (275 mg, 1 mmol, 1 equiv.), *trans*-2-pentenal (540  $\mu\text{L}$ , 5.5 mmol, 5.5 equiv.), diphenyl phosphoric acid (25 mg, 0.1 mmol, 0.1 equiv.) and catalyst **4b** (75 mg, 0.2 mmol, 0.2 equiv.). The crude mixture was purified by flash column chromatography (hexane/EtOAc: 92:8 v/v) to afford the title compound as a colorless oil (216 mg, 60% yield, 90% ee). TLC: (hexane/EtOAc: 90:10 v/v). The ee (90%) was determined by HPLC analysis on a Daicel Chiralpak IC column 97:03 hexane:*i*PrOH flow rate 0.80 mL/min;  $\lambda = 254$  nm;  $\tau_{\text{major}} = 14.00$  min,  $\tau_{\text{minor}} = 15.79$  min.

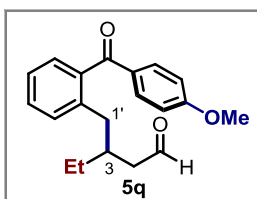

**(S)-3-[2-(4-methoxybenzoyl)benzyl]pentanal (5q)**. Compound **5q** was prepared according to the general procedure A, using (4-methoxyphenyl)(*o*-tolyl)methanone (45 mg, 0.2 mmol, 1 equiv.), *trans*-2-pentenal (108  $\mu\text{L}$ , 1.1 mmol, 5.5 equiv.), diphenyl phosphoric acid (10 mg, 0.04 mmol, 0.2 equiv.) and catalyst **4b** (15 mg, 0.04 mmol, 0.2 equiv.). The crude mixture was purified by flash column chromatography (hexane/EtOAc: 90:10 v/v) to afford the title compound as a colorless oil (42 mg, 67% yield, 84% ee).

TLC: (hexane/EtOAc: 90:10 v/v),  $R_f = 0.33$ . The ee (84%) was determined by HPLC analysis on a Daicel Chiralpak IC-3 column 85:15 hexane:*i*PrOH flow rate 1.00 mL/min;  $\lambda = 254$  nm;  $\tau_{\text{major}} = 20.3$  min,  $\tau_{\text{minor}} = 22.8$  min.  $[\alpha]_{\text{D}}^{26} = +150.5$  ( $c = 0.7$  in  $\text{CHCl}_3$ ). HRMS calculated for  $[\text{C}_{20}\text{H}_{22}\text{O}_3 + \text{Na}]^+$ : 333,1467; found: 333,1470.

$^1\text{H NMR}$  (400 MHz,  $\text{CDCl}_3$ )  $\delta$  9.58 (t,  $J = 2.2$  Hz, 1H, CHO), 7.88 – 7.75 (m, 2H, Ar), 7.43 (m, 1H, Ar), 7.34 – 7.25 (m, 3H, Ar), 6.98 – 6.89 (m, 2H, Ar), 3.90 (s, 3H, OMe), 2.83 (dd,  $J = 13.8, 6.5$  Hz, 1H, H1' $\alpha$ ), 2.54 (dd,  $J = 13.8, 8.2$  Hz, 1H, H1' $\beta$ ), 2.29 (m, 2H, H2), 2.18 (dq,  $J = 8.2, 6.4$  Hz, 1H, H3), 1.37 – 1.28 (m, 2H, H4), 0.83 (t,  $J = 7.4$  Hz, 3H,  $\text{CH}_3$ ).  $^{13}\text{C NMR}$  (100 MHz,  $\text{CDCl}_3$ )  $\delta$  202.9 (C=O), 197.1 (CHO), 163.8 (Cq Ar), 139.5 (Cq Ar), 138.8 (Cq Ar), 132.5 (CH Ar), 130.9 (CH Ar), 130.6 (Cq Ar), 129.8 (CH Ar), 128.4 (CH Ar), 125.7 (CH Ar), 113.7 (CH Ar), 55.5 (OMe), 47.5 ( $\text{CH}_2$ ), 37.4 ( $\text{CH}_2$ ), 36.7 ( $\text{CH}_2$ ), 26.8 (CH), 11.0 ( $\text{CH}_3$ ).

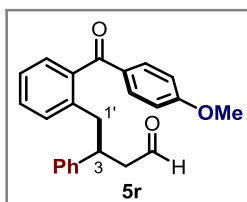

**(S)-4-[2-(4-Methoxybenzoyl)phenyl]-3-phenylbutanal (5r)**. Compound **5r** was prepared according to the general procedure B, using (4-methoxyphenyl)(*o*-tolyl)methanone (90 mg, 0.4 mmol, 2 equiv.), *trans*-cinnamaldehyde (25  $\mu\text{L}$ , 0.2 mmol, 1 equiv.), diphenyl phosphoric acid (10 mg, 0.04 mmol, 0.2 equiv.) and catalyst **4a** (13 mg, 0.04 mmol, 0.2 equiv.). The crude mixture was purified by flash column chromatography (hexane/EtOAc: 95:5 v/v) to afford the title compound as a colourless oil

(43 mg, 60% yield, 90% ee). TLC: (hexane/EtOAc: 90:10 v/v),  $R_f = 0.28$ . The ee (90%) was determined by UPC<sup>2</sup> analysis on a Daicel Chiralpak IC column using a gradient method (from

100% CO<sup>2</sup> to 60:40 CO<sup>2</sup>:ACN), flow rate 2.00 mL/min;  $\lambda = 283$  nm;  $\tau_{\text{major}} = 3.78$  min,  $\tau_{\text{minor}} = 4.19$  min.  $[\alpha]_{\text{D}}^{26} = 63.5$  ( $c = 0.3$  in CHCl<sub>3</sub>). HRMS calculated for [C<sub>24</sub>H<sub>22</sub>O<sub>3</sub>+Na]<sup>+</sup>: 381,1467; found: 381,1470.

**<sup>1</sup>H NMR (500 MHz, CDCl<sub>3</sub>)**  $\delta$  9.60 (t,  $J = 1.9$  Hz, 1H, CHO), 7.71 – 7.66 (m, 2H, Ar), 7.66 – 7.61 (m, 1H, Ar), 7.53 – 7.45 (m, 4H, Ar), 7.42 – 7.34 (m, 2H, Ar), 7.32 – 7.30 (m, 1H, Ar), 7.23 – 7.11 (m, 3H, Ar), 7.05 – 7.01 (m, 2H, Ar), 3.53 (m, 1H, H<sub>3</sub>), 3.10 (dd,  $J = 13.8, 6.4$  Hz, 1H, H1' $\alpha$ ), 3.05 (dd,  $J = 13.7, 8.9$  Hz, 1H, H1' $\beta$ ), 2.82 (ddd,  $J = 16.9, 8.1, 2.0$  Hz, 1H, H2 $\alpha$ ), 2.75 (ddd,  $J = 16.9, 6.7, 1.8$  Hz, 1H, H2 $\beta$ ). **<sup>13</sup>C NMR (125 MHz, CDCl<sub>3</sub>)**  $\delta$  201.7 (C=O), 197.0 (CHO), 163.7 (Cq Ar), 142.9 (Cq Ar), 139.2 (Cq Ar), 138.2 (Cq Ar), 132.6 (CH Ar x2), 131.0, 130.6 (Cq Ar), 129.8 (CH Ar), 128.6 (CH Ar), 128.5 (CH Ar x2), 127.5 (CH Ar x2), 126.7 (CH Ar), 125.6 (CH Ar), 113.7 (CH Ar x2), 55.5 (CH<sub>3</sub> OMe), 49.1 (CH), 41.9 (CH<sub>2</sub>), 40.3 (CH<sub>2</sub>).

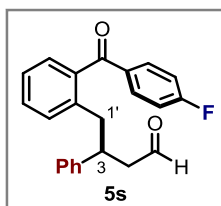

**(S)-4-[2-(4-fluorobenzoyl)phenyl]-3-phenylbutanal (5s)**. Compound **5s** was prepared according to the general procedure B, using (4-fluorophenyl)(*o*-tolyl)methanone (86mg, 0.4 mmol, 2 equiv.), *trans*-cinnamaldehyde (25  $\mu$ L, 0.2 mmol, 1 equiv.), diphenyl phosphoric acid (10 mg, 0.04 mmol, 0.2 equiv.) and catalyst **4a** (13 mg, 0.04 mmol, 0.2 equiv.). The crude mixture was purified by flash column chromatography (hexane/EtOAc: 95:5 v/v) to afford the title compound as a colourless oil (49 mg, 72% yield, 92% ee). TLC:

(hexane/EtOAc: 90:10 v/v),  $R_f = 0.30$ . The ee (92%) was determined by HPLC analysis on a Daicel Chiralpak IC-3 column using an isocratic method (Hexane : *i*-PrOH, 98:2), flow rate 0.7 mL/min;  $\lambda = 254$  nm, mL/min;  $\lambda = 247$  nm;  $\tau_{\text{major}} = 14.09$  min,  $\tau_{\text{minor}} = 25.20$  min.  $[\alpha]_{\text{D}}^{26} = +37.6$  ( $c = 0.5$  in CHCl<sub>3</sub>). HRMS calculated for [C<sub>23</sub>H<sub>19</sub>FO<sub>2</sub>+Na]<sup>+</sup>: 369,1267; found: 369,1270.

**<sup>1</sup>H NMR (400 MHz, CDCl<sub>3</sub>)**  $\delta$  9.58 (t,  $J = 2.0$  Hz, 1H, CHO), 7.78 – 7.63 (m, 2H, Ar), 7.38 (m, 1H, Ar), 7.27 – 7.22 (m, 2H, Ar), 7.22 – 7.08 (m, 6H, Ar), 7.08 – 7.02 (m, 2H, Ar), 3.53 (q,  $J = 7.5$  Hz, 1H, H<sub>3</sub>), 3.11 (dd,  $J = 13.6, 8.2$  Hz, H1' $\alpha$ ), 3.04 (dd,  $J = 13.6, 7.0$  Hz, 1H, H1' $\beta$ ), 2.80 – 2.72 (m, 2H, H2 $\alpha$ +H2 $\beta$ ). **<sup>13</sup>C NMR (100 MHz, CDCl<sub>3</sub>)**  $\delta$  201.4 (C=O), 196.7 (CHO), 167.1, 164.5, 142.7 (Cq Ar), 138.8 (Cq Ar), 138.4 (Cq Ar), 134.1 (Cq Ar), 134.1 (Cq Ar), 132.9 (CH Ar), 132.8 (CH Ar), 131.3 (CH Ar), 130.3 (CH Ar), 128.9 (CH Ar), 128.6 (CH Ar x2), 127.5 (CH Ar x2), 126.8 (CH Ar), 125.7 (CH Ar), 115.6, 115.4, 49.3 (CH), 42.1 (CH<sub>2</sub>), 40.0 (CH<sub>2</sub>).

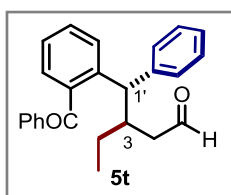

**(R)-3-[(S)-(2-benzoylphenyl)(phenyl)methyl]pentanal (5t)**. Compound **5t** was prepared according to the general procedure A, using (2-benzoylphenyl)(phenyl)methanone (54 mg, 0.2 mmol, 1 equiv.), *trans*-2-pentenal (108  $\mu$ L, 1.1 mmol, 5.5 equiv.), diphenyl phosphoric acid (10 mg, 0.04 mmol, 0.2 equiv.) and catalyst **4b** (15 mg, 0.04 mmol, 0.2 equiv.). The crude mixture was purified by flash column chromatography (hexane/EtOAc: 90:10 v/v) to afford the title compound as a colorless oil (32 mg, 45% yield,

98% ee) and as a single diastereoisomer ( $dr > 20:1$ , as inferred by <sup>1</sup>H NMR analysis of the crude mixture). TLC: (hexane/EtOAc: 87:13 v/v),  $R_f = 0.33$ . The ee (98%) was determined by HPLC analysis on a Daicel Chiralpak IC-3 column 85:15 hexane:*i*PrOH flow rate 0.80 mL/min;  $\lambda = 254$  nm;  $\tau_{\text{major}} = 10.8$  min,  $\tau_{\text{minor}} = 11.9$  min.  $[\alpha]_{\text{D}}^{26} = +13.3$  ( $c = 0.5$  in CHCl<sub>3</sub>). HRMS calculated for [C<sub>25</sub>H<sub>24</sub>O<sub>2</sub>+Na]<sup>+</sup>: 379,1674; found: 379,1677.

**<sup>1</sup>H NMR (400 MHz, CDCl<sub>3</sub>)**  $\delta$  9.54 (t,  $J = 1.8$  Hz, 1H, CHO), 7.67 – 7.60 (m, 2H, Ar), 7.59 – 7.48 (m, 2H, Ar), 7.40 – 7.30 (m, 3H, Ar), 7.17 – 7.01 (m, 7H, Ar), 4.10 (d,  $J = 11.6$  Hz, 1H, H1'), 2.96 (dddd,  $J = 13.4, 11.5, 6.0, 3.4$  Hz, 1H, H<sub>3</sub>), 2.40 (d,  $J = 1.9$  Hz, 1H, H2 $\alpha$ ), 2.39 (d,  $J = 1.9$  Hz, 1H, H2 $\alpha$ ), 1.41 – 1.28 (m, 1H, H<sub>4</sub>), 1.16-1.07 (m, 1H, H<sub>4</sub>), 0.66 (t,  $J = 7.4$  Hz, 3H, CH<sub>3</sub>). **<sup>13</sup>C NMR (100 MHz, CDCl<sub>3</sub>)**  $\delta$  202.1 (C=O), 198.9 (CHO), 142.8 (Cq Ar), 142.6 (Cq Ar), 139.5 (Cq Ar), 137.9 (Cq Ar), 133.4 (CH Ar), 130.6 (CH Ar), 130.4 (CH Ar x2), 128.5 (CH Ar), 128.5 (CH Ar x2),



128.4 (CH Ar x2), 128.2 (CH Ar x2), 127.9 (CH Ar), 126.3 (CH Ar), 125.6 (CH Ar), 50.2 (CH C1'), 46.3 (CH<sub>2</sub>), 37.8 (CH<sub>2</sub>), 25.0 (CH), 10.0 (CH<sub>3</sub>).

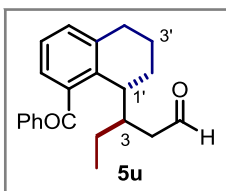

**(R)-3-[(R)-8-benzoyl-tetrahydronaphthalenyl]pentanal (5u).** Compound **5u** was prepared according to the general procedure A, using phenyl(tetrahydronaphthalenyl)methanone (47 mg, 0.2 mmol, 1 equiv.), *trans*-2-pentenal (108  $\mu$ L, 1.1 mmol, 5.5 equiv.), diphenyl phosphoric acid (10 mg, 0.04 mmol, 0.2 equiv.) and catalyst **4b** (15 mg, 0.04 mmol, 0.2 equiv.). The crude mixture was purified by flash column chromatography (hexane/EtOAc: 90:10 v/v) to afford the title compound as an inseparable mixture of two diastereoisomers (colorless oil 30 mg, 47% yield, 97% ee, 7:1 dr, dr inferred by <sup>1</sup>H NMR analysis of the crude mixture). TLC: (hexane/EtOAc: 90:10 v/v), R<sub>f</sub> = 0.32. The ee (97%) was determined by HPLC analysis on a Daicel Chiralpak IB column 85:15 hexane:*i*PrOH flow rate 1.00 mL/min;  $\lambda$  = 254 nm;  $\tau_{\text{major}}$  = 24.0 min,  $\tau_{\text{minor}}$  = 30.1 min.  $[\alpha]_{\text{D}}^{26}$  = - 775.2 (c = 1.00 in CHCl<sub>3</sub>). HRMS calculated for [C<sub>22</sub>H<sub>24</sub>O<sub>2</sub>+Na]<sup>+</sup>: 343,1674; found: 343,1675.

**<sup>1</sup>H NMR (400 MHz, CDCl<sub>3</sub>)**  $\delta$  9.39 (dd, *J* = 2.9, 2.0 Hz, 1H, CHO), 7.88 – 7.83 (m, 2H, Ar), 7.62 (m, 1H, Ar), 7.49 (m, 2H, Ar), 7.25 – 7.11 (m, 3H), 3.38 (q, *J* = 6.1 Hz, 1H, H1'), 2.81 (m, 2H, H4), 2.30 – 2.23 (m, 2H, H2), 2.22 – 2.14 (m, 1H, H3), 2.04 – 1.92 (m, 1H, H3' $\alpha$ ), 1.84 – 1.75 (m, 1H, H3'a), 1.72 – 1.61 (m, 2H, H2'), 1.34 – 1.15 (m, 2H, H4), 0.66 (t, *J* = 7.4 Hz, CH<sub>3</sub>). **<sup>13</sup>C NMR (100 MHz, CDCl<sub>3</sub>)**  $\delta$  203.1 (C=O), 198.9 (CHO), 140.3 (Cq Ar), 139.3 (Cq Ar), 138.5 (Cq Ar), 137.7 (Cq Ar), 133.3, 131.1, 130.1 (CH<sub>2</sub> Ar x2), 128.5 (CH<sub>2</sub> Ar x2), 127.0 (CH Ar), 125.0 (CH Ar), 46.1 (CH), 39.8 (CH<sub>2</sub>), 37.1 (CH<sub>2</sub>), 30.0 (CH), 23.7 (CH<sub>2</sub>), 23.1 (CH<sub>2</sub>), 20.2 (CH<sub>2</sub>), 11.5 (CH<sub>3</sub>).

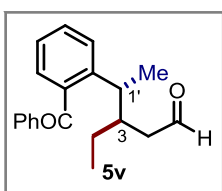

**(3R,4R)-4-(2-benzoylphenyl)-3-ethylpentanal (5v).** Compound **5v** was prepared according to the general procedure A, using 2-ethylbenzophenone (42 mg, 0.2 mmol, 1 equiv.), *trans*-2-pentenal (108  $\mu$ L, 1.1 mmol, 5.5 equiv.), diphenyl phosphoric acid (10 mg, 0.04 mmol, 0.2 equiv.) and catalyst **4b** (15 mg, 0.04 mmol, 0.2 equiv.). The crude mixture was purified by flash column chromatography (hexane/EtOAc: 90:10 v/v) to afford the title

compound as an inseparable mixture of two diastereoisomers (colorless oil, 40 mg, 68% yield, 1.3:1 dr, 87% ee major isomer and 84% ee minor isomer). TLC: (hexane/EtOAc: 90:10 v/v), R<sub>f</sub> = 0.29. The ee was determined by HPLC analysis on a Daicel Chiralpak IC-3 column 95:5 hexane:*i*PrOH flow rate 0.9 mL/min;  $\lambda$  = 254 nm; major diastereoisomer:  $\tau_{\text{major}}$  = 21.3 min,  $\tau_{\text{minor}}$  = 23.7 min (84% ee); minor diastereoisomer:  $\tau_{\text{major}}$  = 24.4 min,  $\tau_{\text{minor}}$  = 26.1 min (87% ee).  $[\alpha]_{\text{D}}^{26}$  = +5.5 (c = 1.00 in CHCl<sub>3</sub>). HRMS calculated for [C<sub>20</sub>H<sub>22</sub>O<sub>2</sub>+Na]<sup>+</sup>: 317,1517; found: 317,1520.

**Diagnostic signals for the major diastereoisomer:** **<sup>1</sup>H NMR (400 MHz, CDCl<sub>3</sub>)**  $\delta$  9.65 (dd, *J* = 2.5, 1.6 Hz, 1H, CHO), 3.09 (p, *J* = 7.0 Hz, 1H, H1'), 2.44 (ddd, *J* = 16.4, 5.0, 1.6 Hz, 1H, H2 $\alpha$ ),  $\delta$  2.30 (dd, *J* = 7.1, 2.5 Hz, 1H, H2 $\beta$ ),  $\delta$  1.36 – 1.27 (m, 2H, H4 $\alpha$ +H4 $\beta$ ), 1.18 (d, *J* = 7.0 Hz, 3H, CH<sub>3</sub>), 0.71 (t, *J* = 7.4 Hz, 3H, CH<sub>3</sub>).

**Diagnostic signals for the minor diastereoisomer:** **<sup>1</sup>H NMR (400 MHz, CDCl<sub>3</sub>)**  $\delta$  9.49 (t, *J* = 2.0 Hz, 1H, CHO), 2.96 – 2.81 (m, 1H, H1'),  $\delta$  2.27 – 2.24 (m, 2H, H2), 2.24 – 2.17 (m, 1H, H3), 1.61 – 1.55 (m, 1H, H4 $\alpha$ ), 1.43 – 1.36 (m, 1H, H4 $\beta$ ) 1.23 (d, *J* = 6.8 Hz, 3H, CH<sub>3</sub>), 0.79 (t, *J* = 7.5 Hz, 3H, CH<sub>3</sub>).

**Complete overlap of the aromatic signals was observed:** **<sup>1</sup>H NMR (400 MHz, CDCl<sub>3</sub>)**  $\delta$  7.86 – 7.79 (m, 4H), 7.65 – 7.57 (m, 2H), 7.52 – 7.41 (m, 9H), 7.31 – 7.25 (m, 5H).

**<sup>13</sup>C NMR (100 MHz, CDCl<sub>3</sub>)**  $\delta$  202.8 (C=O), 202.6 (C=O), 198.7 (CHO), 198.7 (CHO), 144.9 (Cq Ar), 144.5 (Cq Ar), 139.1 (Cq Ar x2), 137.8 (Cq Ar), 137.8 (Cq Ar), 133.4 (CH Ar), 133.4 (CH Ar), 130.4 (CH Ar), 130.2 (CH Ar), 130.1 (CH Ar), 128.5 (CH Ar), 128.5 (CH Ar), 128.2 (CH Ar), 128.1 (CH Ar), 127.3 (CH Ar), 127.2 (CH Ar), 125.6 (CH Ar), 125.4 (CH Ar), 46.3 (CH), 45.0

(CH), 40.3 (CH<sub>2</sub>), 40.3 (CH<sub>2</sub>), 38.2 (CH<sub>2</sub>), 37.5 (CH<sub>2</sub>), 25.4 (CH), 23.6 (CH), 19.5 (CH<sub>3</sub>), 17.6 (CH<sub>3</sub>), 11.1 (CH<sub>3</sub>), 10.0 (CH<sub>3</sub>).

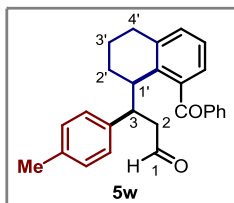

**(R)-3-[(R)-8-benzoyl-tetrahydronaphthalenyl]-3-(p-tolyl)propanal (5w).**

Compound **5w** was prepared according to the general procedure B, using phenyl(tetrahydronaphthalenyl)methanone (96 mg, 0.4 mmol, 2 equiv.), *trans*-cinnamaldehyde (25  $\mu$ L, 0.2 mmol, 1 equiv.), diphenyl phosphoric acid (10 mg, 0.04 mmol, 0.2 equiv.) and catalyst **4a** (13 mg, 0.04 mmol, 0.2 equiv.). The crude mixture was purified by flash column chromatography (hexane/EtOAc: 93:7 v/v) to afford the title compound as a colourless oil

(36.5 mg, 48% yield, 80% ee). TLC: (hexane/EtOAc: 90:10 v/v),  $R_f = 0.33$ . The ee (80%) was determined by HPLC analysis on a Daicel Chiralpak IC-3 column using a isocratic method (80:20 Hexane:*i*PrOH), flow rate 0.4 mL/min;  $\lambda = 247$  nm;  $\tau_{\text{major}} = 24.03$  min,  $\tau_{\text{minor}} = 24.92$  min.  $[\alpha]_D^{26} = +18.6$  ( $c = 0.5$  in  $\text{CHCl}_3$ ). HRMS calculated for  $[\text{C}_{27}\text{H}_{26}\text{O}_2 + \text{Na}]^+$ : 405,1830; found: 405,1829.

**<sup>1</sup>H NMR (500 MHz, CDCl<sub>3</sub>)**  $\delta$  9.26 (t,  $J = 1.9$  Hz, 1H, CHO), 7.32 (m, 1H, Ar), 7.22 (m, 3H, Ar), 7.20 – 7.16 (m, 5H, Ar), 7.15 – 7.07 (m, 4H, Ar), 3.66 (ddd,  $J = 10.0, 4.9, 2.9$  Hz, 1H, H1'), 3.43 (td,  $J = 9.9, 5.1$  Hz, 1H, H3), 2.84 (m, 2H, H4' $\alpha$ +H2 $\alpha$ ), 2.75 (dd,  $J = 8.5, 4.7$  Hz, 1H, H4 $\beta$ ), 2.58 – 2.49 (ddd,  $J = 16.8, 5.1, 1.7$  Hz, 1H, H2 $\beta$ ), 2.45 (s, 3H, Me), 1.92 (m, 1H, H3' $\alpha$ ), 1.59 (m, 1H, H3' $\beta$ ), 1.52 – 1.41 (m, 1H, H2' $\alpha$ ), 1.38 – 1.31 (m, 1H, H2' $\beta$ ). **<sup>13</sup>C NMR (125 MHz, CDCl<sub>3</sub>)**  $\delta$  202.1 (C=O), 201.3 (CHO), 143.0 (Cq Ar), 140.4 (Cq Ar), 139.6 (Cq Ar), 139.2 (Cq Ar), 139.0 (Cq Ar), 138.4 (Cq Ar), 132.3 (CH Ar), 131.7 (CH Ar), 131.3 (CH Ar), 130.4 (CH Ar), 128.6 (CH Ar x2), 128.5 (CH Ar x2), 128.1 (CH Ar), 126.7 (CH Ar), 125.9 (CH Ar), 125.5 (CH Ar), 48.7 (CH), 42.6 (CH), 40.0 (CH<sub>2</sub>), 27.6 (CH<sub>2</sub>), 23.7 (CH<sub>2</sub>), 21.0 (CH<sub>3</sub> Me), 17.2 (CH<sub>2</sub>).

## Product Manipulations

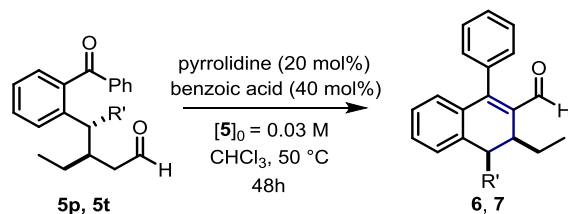

The adduct **5** (1 equiv.) was dissolved in dry  $\text{CHCl}_3$  (0.03 M solution). Pyrrolidine (20 mol%) and benzoic acid (40 mol%) were sequentially added under an argon atmosphere, and the solution was warmed up to 50 °C. After 48 h stirring, water was added and the biphasic mixture was extracted with DCM (x 3). The organic phases were collected and concentrated under vacuum. The obtained material was then subjected to FC purification to afford the title compound in the stated yield.

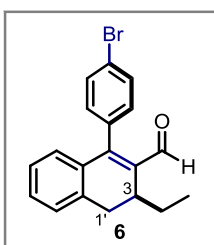

### (*S*)-1-(4-bromophenyl)-3-ethylidihydronaphthalenecarbaldehyde (**6**)

Compound **6** was prepared from (*S*)-3-(2-(4-bromobenzoyl)benzyl)pentanal **5p** (100 mg, 0.27 mmol, 1 equiv.), pyrrolidine (5  $\mu\text{L}$ , 0.05 mmol, 0.2 equiv.) and benzoic acid (13 mg, 0.11 mmol, 0.4 equiv.). The crude mixture was purified by flash column chromatography (hexane/EtOAc: 97:3 v/v) to afford the title compound as a colorless oil (72 mg, 78% yield, 90% ee). TLC: (hexane/EtOAc: 90:10 v/v),  $R_f = 0.32$ . The ee (90%) was determined by HPLC analysis on a Daicel Chiralpak IC-3 column 98:2 hexane:*i*PrOH flow

rate 0.80 mL/min;  $\lambda = 254 \text{ nm}$ ;  $\tau_{\text{major}} = 16.51 \text{ min}$ ,  $\tau_{\text{minor}} = 17.37 \text{ min}$ .  $[\alpha]_{\text{D}}^{26} = -4.1$  ( $c = 0.5 \text{ g cm}^{-3}$  in  $\text{CHCl}_3$ ). HRMS calculated for  $[\text{C}_{19}\text{H}_{17}\text{BrO}+\text{Na}]^+$ : 363,0360; found: 363,0365.

**$^1\text{H}$  NMR (500 MHz, Chloroform-*d*)**  $\delta$  9.57 (s, 1H, CHO), 7.63 (m, 2H, Ar), 7.32 (td,  $J = 7.4, 1.3$  Hz, 1H), 7.30 – 7.23 (m, 2H), 7.15 (m, 2H, Ar), 6.83 (dd,  $J = 7.8, 1.2$  Hz, 1H, Ar), 3.18 – 2.98 (m, 2H, H1' $\alpha$ +H3), 2.93 (d,  $J = 15.0$  Hz, 1H, H1' $\beta$ ), 1.49 – 1.38 (m, 1H, H4 $\alpha$ ), 1.35 – 1.24 (m, 1H, H4 $\beta$ ), 0.92 (t,  $J = 7.4$  Hz, 3H, CH<sub>3</sub>).  **$^{13}\text{C}$  NMR (125 MHz, CDCl<sub>3</sub>)**  $\delta$  192.7 (CHO), 152.3 (Cq), 139.0 (Cq Ar), 137.1 (Cq Ar), 134.4 (Cq Ar), 134.3 (Cq Ar), 130.5 (CH Ar), 128.9 (CH Ar), 128.1 (CH Ar), 126.6 (CH Ar), 122.8 (Cq), 31.6 (CH<sub>2</sub>), 31.3 (CH), 24.1 (CH<sub>2</sub>), 11.8 (CH<sub>3</sub>).

The absolute configuration of compound **6** was unambiguously inferred by anomalous dispersion X-ray crystallographic analysis (CCDC 1417311), see X-ray Crystallographic Data section.

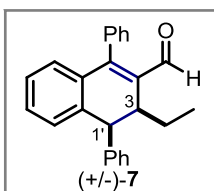

**3-(2-benzoylbenzyl)pentanal (7)**. Compound **7** was prepared from 3-[(2-benzoylphenyl)(phenyl)methyl]pentanal **5t** (17 mg, 0.05 mmol, 1 equiv.), pyrrolidine (0.2 mL of a stock solution in  $\text{CHCl}_3$  0.05 M, 0.2 equiv.) and benzoic acid (2.5 mg, 0.4 equiv.). The crude mixture was purified by flash column chromatography (hexane/EtOAc: 97:3 v/v) to afford the title compound as a colorless oil (8 mg, 48% yield). TLC: (hexane/EtOAc: 90:10

v/v),  $R_f = 0.32$ . HRMS calculated for  $[\text{C}_{25}\text{H}_{22}\text{O}+\text{Na}]^+$ : 361,1568; found: 361,1576.

**$^1\text{H}$  NMR (400 MHz, CDCl<sub>3</sub>)**  $\delta$  9.42 (d,  $J = 0.6$  Hz, 1H, CHO), 7.53 – 7.44 (m, 4H, Ar), 7.37 (m, 1H, Ar), 7.31 – 7.20 (m, 4H, Ar), 7.18 – 7.12 (m, 1H, Ar), 7.09 – 6.97 (m, 4H), 7.18 – 7.12 (m, 1H), 7.09 – 6.97 (m, 3H), 4.25 (s, 1H, H1'), 3.31 (ddd,  $J = 7.9, 6.2, 1.5$  Hz, 1H, H3), 1.66 – 1.59 (m, 1H, H4 $\alpha$ ), 1.54 – 1.46 (m, 1H, H4 $\beta$ ), 1.07 (t,  $J = 7.4$  Hz, 3H, CH<sub>3</sub>).  **$^{13}\text{C}$  NMR (100 MHz, CDCl<sub>3</sub>)**  $\delta$  193.2 (CHO), 153.5 (Cq), 143.4 (Cq Ar), 138.4.0 (Cq Ar), 136.9 (Cq Ar), 136.3 (CH Ar), 135.7 (Cq Ar), 135.3 (CH Ar), 133.1 (CH Ar), 130.8 (CH Ar), 128.6 (CH Ar), 128.5 (CH Ar), 128.3 (CH Ar), 127.5 (CH Ar), 127.3 (CH Ar), 126.3 (Cq), 46.7 (CH), 40.1 (CH), 31.6 (CH<sub>2</sub>), 26.1 (CH<sub>2</sub>), 12.0 (CH<sub>3</sub>).

The stereochemical assignment of compound **7** was based on  $^1\text{H}$ - $^1\text{H}$  NOESY spectroscopic experiments performed on a 400 MHz instrument. Diagnostic interactions are shown below.

$^1\text{H}$ - $^1\text{H}$  NOESY analysis of product **7**. Diagnostic nOe interactions.

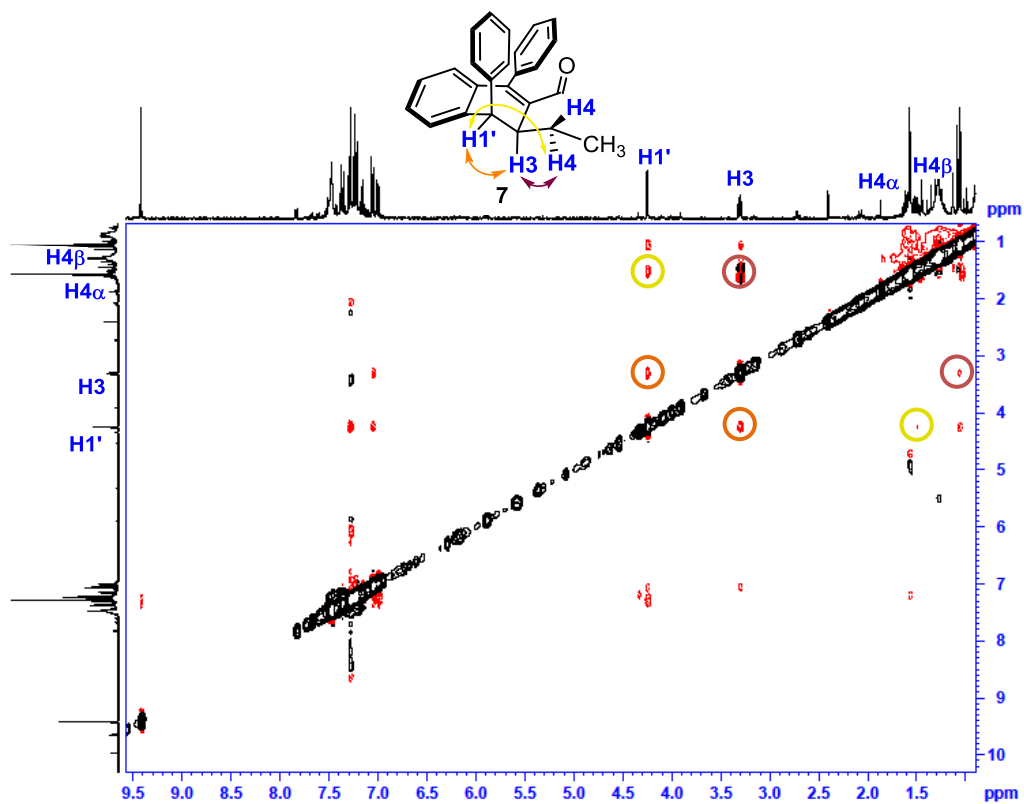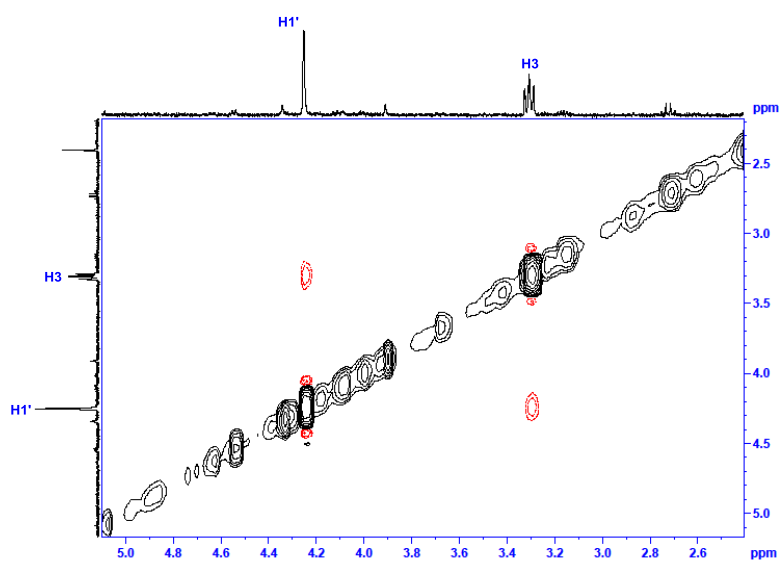

## D. Mechanistic Investigations

### 1. Transient Absorption Spectroscopy (TAS) Studies

Using the transient spectroscopy system available at the ICIQ (specifications of the equipment can be found in the *General Information*, page S3), we observed a transient species upon selective irradiation of a  $5 \times 10^{-3}$  M solution of 2-methylbenzophenone **1a** in cyclohexane, showing an absorption maximum at 450 nm. The half lifetime of the transient was ca. 150 ms (Figure S2). The characteristics of the detected transient are in agreement with literature data obtained upon flash photolysis studies of **1a**, which identified the absorption of the ground state (*E*)-photoenol in the region of 400-450 nm (3-5).

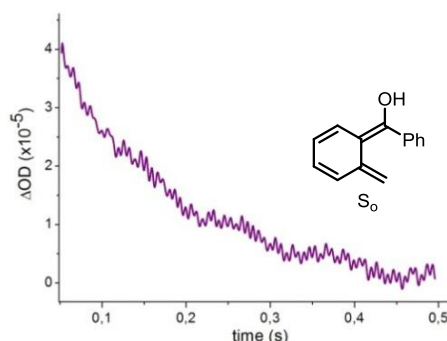

**Figure S2.** Decay of absorption at 450 nm of a transient generated upon 355 nm laser excitation of 2-methylbenzophenone **1a** ( $[1a] = 5 \times 10^{-3}$  M in cyclohexane).  $\Delta OD$ : optical density variation.  $\tau_{1/2} = 150$  ms.

We next evaluated the effect of the catalyst **4b** on the decay of the absorption of transient (*E*)-photoenol generated from **1a**. The results of the flash photolysis studies, conducted in toluene, are shown in Figure S3. We selected a time scale (20 ms) suitable for clearly showing the decay of the transient. It can be appreciated how the formation of the transient is only marginally affected by the presence of increasing amounts of **4b**, as indicated by the slight decay of the initial absorption. Repeating the same experiments adding pentenal **3a** or cinnamaldehyde did not affect the formation of the transient **A** to any extent.

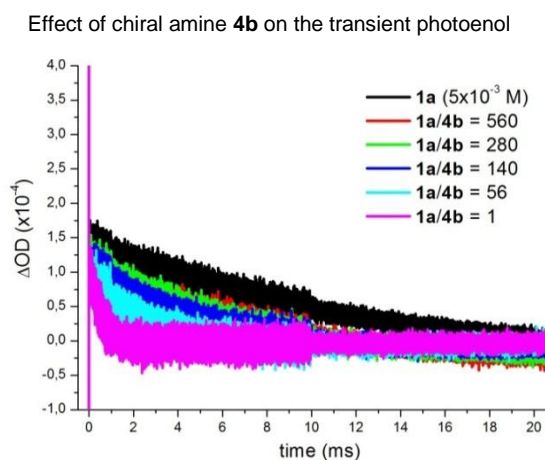

**Figure S3.** Decay of absorption obtained in the presence of the catalyst **4b**. Absorption at 450 nm of the transient (*E*)-photoenol **A** (black line) generated upon 355 nm laser excitation of 2-methylbenzophenone **1a** ( $[1a] = 5 \times 10^{-3}$  M in toluene). Absorption decays (colored lines) observed in the presence of increasing amounts of the amine catalyst **4b**. The time scale showed: 20 ms. Studies performed using the transient spectroscopy system specified in the *General Information*, page S3.

In a typical transient absorption spectroscopy experiment, 2.8 mL of a  $5 \times 10^{-3}$  M toluene solution of 2-methylbenzophenone **1a** (0.014 mmol) were added to a screw-top 3.0 mL quartz cuvette. Upon 355 nm laser excitation, the decay of absorption at 450 nm of the transient (*E*)-photoenol (black line in Figure S3) was collected. The effect of the catalyst **4b** was evaluated by sequentially adding, to the original **1a** solution, increasing amounts of an equimolar solution of 2-methylbenzophenone **1a** and catalyst **4b** in toluene ( $5 \times 10^{-3}$  M, 1:1 ratio between **1a** and **4b**). After every addition, the decay of absorption of the transient photoenol was recorded (coloured lines in Figure S3). This procedure allowed us to keep the concentration of **1a** constant to  $5 \times 10^{-3}$  M in all the measurements. It is of note that the same experiment, when conducted upon degassing the solutions by bubbling a stream of argon for 10 minutes after every addition, gave a very similar profile for the decay of the transient (*E*)-photoenol absorption.

Table S1 below shows the volumes of the **1a:4b** equimolar solution ( $5 \times 10^{-3}$  M in toluene) added to 2.8 mL of a  $5 \times 10^{-3}$  M toluene solution of 2-methylbenzophenone **1a**. The corresponding concentration of **4b** and the total volume in every measurement is shown, while [**1a**] is constantly  $5 \times 10^{-3}$  M.

**Table S1.** Volumes of a **1a:4b** equimolar solution ( $5 \times 10^{-3}$  M in toluene) added to the initial solution of **1a** (2.8 mL of a  $5 \times 10^{-3}$  M toluene solution, 0.014 mmol) and the corresponding concentrations of **4b** in every measurement.

| Volume of <b>1a:4b</b><br>equimolar solution<br>( $\mu\text{L}$ ) | mmol of <b>4b</b><br>( $\times 10^{-5}$ ) | total volume<br>(mL) | [ <b>4b</b> ]<br>( $\times 10^{-5}$ M) | Ratio $\frac{[1a]}{[4b]}$ |
|-------------------------------------------------------------------|-------------------------------------------|----------------------|----------------------------------------|---------------------------|
| 0                                                                 | 0                                         | 2.8                  | 0                                      | -                         |
| 5                                                                 | 2,5                                       | 2.805                | 0.9                                    | 560                       |
| 10                                                                | 5                                         | 2.81                 | 1.8                                    | 280                       |
| 20                                                                | 10                                        | 2.82                 | 3.5                                    | 140                       |
| 50                                                                | 25                                        | 2.85                 | 8.8                                    | 56                        |

During the last measurement, an equimolar solution of 2-methylbenzophenone **1a** and catalyst **4b** was used (**1a:4b** = 1:1).

## 2. Control Experiments

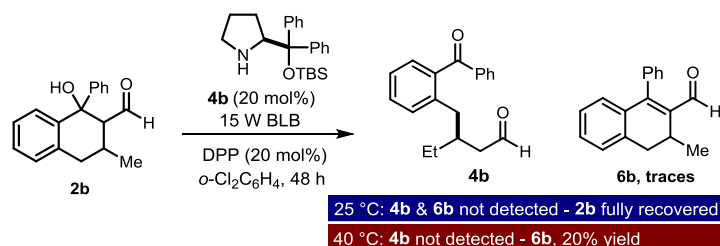

When an authentic sample of the cyclic adduct **2b** (inseparable mixture of diastereoisomers, synthesized from crotonaldehyde and 2-methylbenzophenone **1a** according to: E. Block, R. Stevenson, *J. Chem. Soc., Perkin Trans. 1*, **1973**, 308–313) was subjected to the optimized photo-organocatalytic condition, we did not detect the open product **4b** to any extent, but we fully recovered the unreacted adduct **2b**. When repeating the experiment at 40 °C, a minor amount ( $\approx$  20%) of the dehydration product of type **6** was recovered. These experiments indicate that the retro-aldol-mediated ring-opening of **2** is not a viable pathway for the formation of **4a**.

### 3. Absorption Spectra

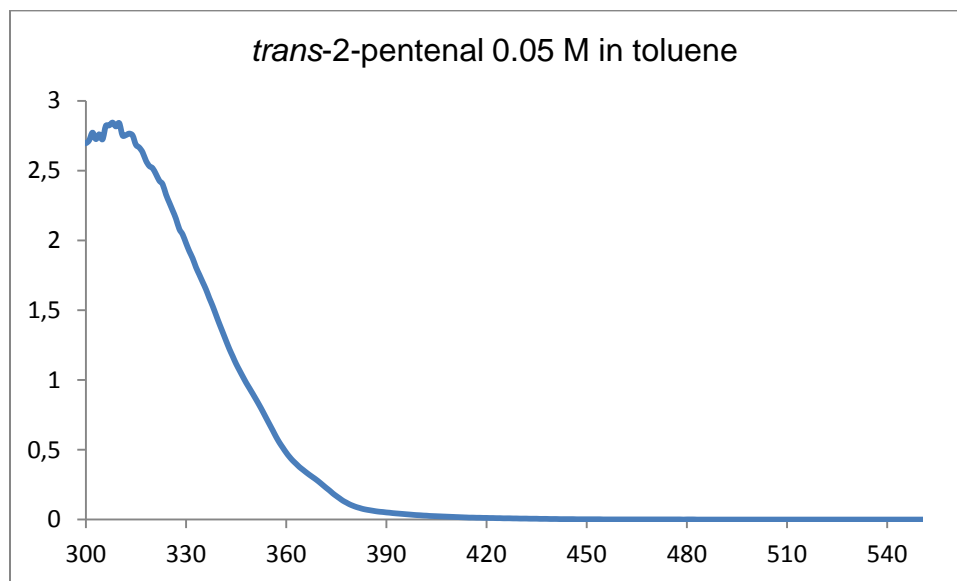

Figure S4. Absorption spectrum of trans-2-pentenal in toluene.

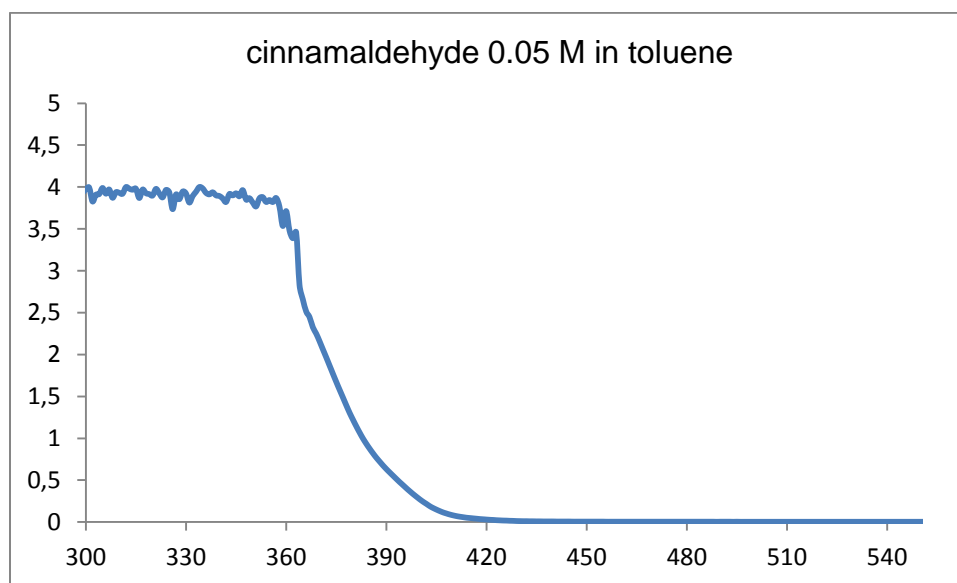

Figure S5. Absorption spectrum of cinnamaldehyde in toluene.

## 4. Computational Details

All calculations were carried out using Gaussian09 software (6).<sup>1</sup> All energies reported in the main text were computed on the full experimental system with the M06-2X functional (7) and the 6-311++G(d,p) basis set (8), with solvent contributions added using the SMD model (9). High level QM calculations were carried out on geometries optimized with and ONIOM(QM:MM) approach (10). The level of theory for the QM part was with the 6-31+G\* basis set, with the MM level being UFF (11). The MM region consisted of the diphenylsiloxy group. The validity of the ONIOM description was confirmed by the similarity of the ONIOM and full QM potential energies in gas phase. Frequency calculations at standard conditions (1 atm, 298 K) were carried out at the ONIOM level to confirm the identity of minima and transition states and compute entropic corrections. Geometry optimizations were carried out without constraints, and IRC calculations were carried out on all transition states to determine connectivity (12, 13).

### Conformational Search

A conformational search was carried out on the iminium ion intermediate **C**, derived from the condensation of crotonaldehyde with the chiral secondary amine **4a**, which corresponds to 120° rotations along the C-C axis that connects with the diarylprolinol-silyl ether unit, and the lowest energy conformation was used in the rest of the calculations (Figure S6). This approach assumes that the most stable conformation in the free substrate will remain unchanged in all stages of the reaction. In fact, the relative energies of the three conformations are 0.0, 6.5, 11.8 kcal.mol<sup>-1</sup>, so even a low barrier rotation of the diarylprolinol-silyl ether has a higher energy cost than the formation of the product.

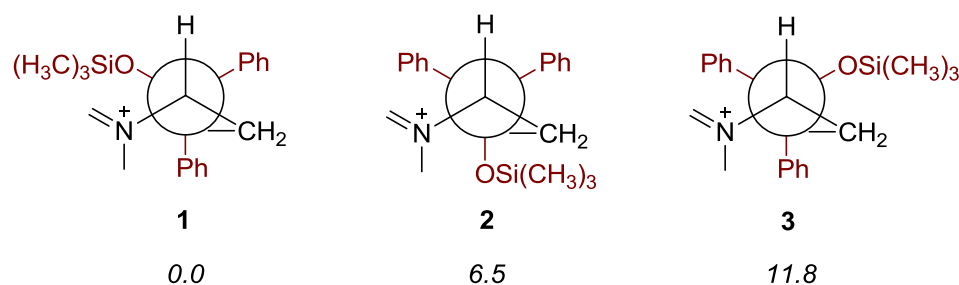

**Figure S6.** Relevant conformations of the iminium ion corresponding to rotations of the diarylprolinol-silyl ether unit. Relative free energies in kcal.mol<sup>-1</sup>.

Concerning the mechanism in absence of a proton shuttle, TS1 and TS2 differ mainly in the attack conformation, particularly in the orientation of the –OH group in the photoenol. In TS1, the proton points away from the nitrogen which has a deficiency in electron density. As a result, the C-C distance is 2.35 Å. On the other hand, the proton in TS2 points towards the nitrogen which already has amine configuration rather than iminium, and this shift in the electron density is reflected in a larger C-C distance (2.59 Å).

### Radical Mechanism

An alternative mechanism could be envisaged where the carbon-carbon bond formation takes place prior to the formation of the ground-state photoenol **A**, in a competing photoinitiated process. We evaluated this hypothetical mechanism (on a model system where methyl replaces the protecting group) and the results are detailed in Figure S7.

After light excitation and intersystem crossing (ISC) to the triplet state (**Kes1** and **Kes2**), 2-methylbenzophenone **1** transfers a hydrogen from the methyl group to the oxygen (**TSs1**) leading to the triplet alcohol (**OHs1**), which can rotate (**OHs2**) and undergo a subsequent ISC to form the singlet photoenol **A**. We evaluated whether there could be bifurcations from both radical



intermediates **OHS1** and **OHS2**, which might be intercepted by the iminium ion affording the final Michael product **4** through the transition states presented in red in Figure S7. However, these steps are not competitive due to the much faster rotation and intersystem crossing to yield the singlet photoenol **A**. On the basis of these results, a radical mechanism can be ruled out.

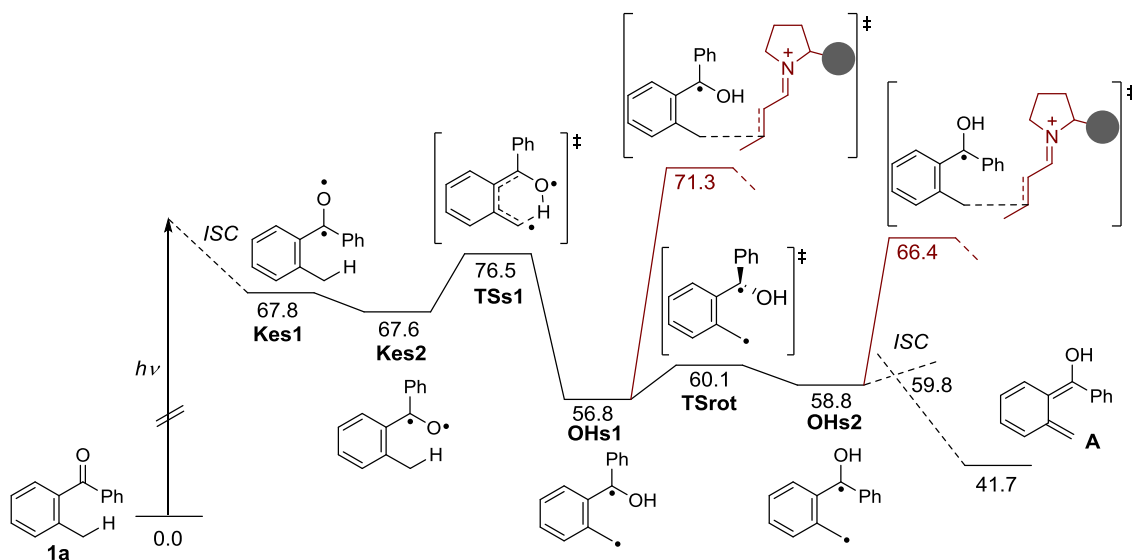

**Figure S7.** Free energy profile for the formation of the photoenol **A** (black profile) and noncompetitive radical formation of the C-C bond leading to the product (red profile). Energies in kcal·mol<sup>-1</sup>

### Optimized Cartesian Coordinates of Intermediates and Transition States

#### Photoenol A

E(M06-2X/6-311++G(d,p) = -615.796231246

Number of Negative Frequencies = 0

|   |           |           |           |
|---|-----------|-----------|-----------|
| C | -2.455420 | -0.922698 | 0.589928  |
| C | -1.146365 | -1.173620 | -0.022790 |
| C | -0.278256 | 0.019314  | -0.197928 |
| C | -0.935732 | 1.324510  | -0.212096 |
| C | -2.208237 | 1.469577  | 0.213902  |
| C | -2.965745 | 0.321040  | 0.685127  |
| H | -3.036580 | -1.789057 | 0.896853  |
| H | -0.349128 | 2.185333  | -0.513048 |
| H | -2.666981 | 2.453565  | 0.240954  |
| H | -3.959351 | 0.475230  | 1.096602  |
| C | -0.854365 | -2.414296 | -0.466811 |
| H | 0.048643  | -2.645085 | -1.020819 |
| C | 1.074457  | -0.034189 | -0.330971 |
| O | 1.730511  | 1.108958  | -0.701756 |
| H | 2.672776  | 1.016515  | -0.497029 |
| C | 1.966606  | -1.195540 | -0.098533 |
| C | 2.916686  | -1.545906 | -1.064494 |
| C | 1.931399  | -1.895583 | 1.114402  |
| C | 3.801117  | -2.599540 | -0.834348 |
| H | 2.942114  | -1.007677 | -2.009488 |
| C | 2.817850  | -2.940666 | 1.343841  |

|   |           |           |           |
|---|-----------|-----------|-----------|
| H | 1.197028  | -1.615172 | 1.864829  |
| C | 3.752052  | -3.299009 | 0.368606  |
| H | 4.524838  | -2.873318 | -1.596657 |
| H | 2.785633  | -3.476923 | 2.287822  |
| H | 4.442368  | -4.117331 | 0.551242  |
| H | -1.547431 | -3.232023 | -0.288504 |

*Iminium Ion C* (derived from crotonaldehyde and catalyst **4a**) - *conformation 1*

E(M06-2X/6-311++G(d,p)) = -1352.98288875

Number of Negative Frequencies = 0

|   |           |           |           |
|---|-----------|-----------|-----------|
| C | 0.867029  | -1.895683 | -0.997059 |
| H | 0.307969  | -2.828523 | -1.015704 |
| C | 0.121324  | -0.688568 | -1.202315 |
| H | 0.604237  | 0.280701  | -1.130991 |
| C | -1.206208 | -0.782322 | -1.438639 |
| H | -1.657878 | -1.775081 | -1.483137 |
| C | -2.117742 | 0.370996  | -1.644043 |
| H | -2.920064 | 0.347369  | -0.896954 |
| H | -1.597454 | 1.328459  | -1.582618 |
| H | -2.606219 | 0.287754  | -2.622261 |
| C | 2.867707  | -3.294810 | -0.534467 |
| C | 3.100594  | -0.876634 | -0.912306 |
| C | 4.341007  | -2.945546 | -0.918674 |
| H | 2.475041  | -3.986993 | -1.271109 |
| C | 4.279291  | -1.563507 | -1.586988 |
| H | 3.356122  | -0.499877 | 0.083511  |
| H | 2.661459  | -0.073429 | -1.502337 |
| H | 5.027196  | -2.925088 | -0.076717 |
| H | 4.736026  | -3.678788 | -1.622796 |
| H | 5.205161  | -0.999564 | -1.461662 |
| H | 4.079045  | -1.657259 | -2.658792 |
| N | 2.138835  | -1.992522 | -0.777346 |
| C | 2.611466  | -3.835853 | 0.915472  |
| C | 3.382658  | -5.129336 | 1.275299  |
| C | 3.365274  | -5.583906 | 2.613999  |
| C | 4.079213  | -5.906029 | 0.322753  |
| C | 4.051142  | -6.741095 | 2.990165  |
| H | 2.814218  | -5.038333 | 3.369943  |
| C | 4.759400  | -7.065903 | 0.705337  |
| H | 4.085411  | -5.650025 | -0.723162 |
| C | 4.751257  | -7.479379 | 2.037231  |
| H | 4.032162  | -7.069504 | 4.021192  |
| H | 5.287841  | -7.650825 | -0.036412 |
| H | 5.278058  | -8.378825 | 2.328650  |
| C | 3.026156  | -2.718027 | 1.905863  |
| C | 4.341598  | -2.618690 | 2.421883  |
| C | 2.085376  | -1.743140 | 2.315703  |
| C | 4.694198  | -1.590440 | 3.299748  |
| H | 5.102855  | -3.339959 | 2.156577  |
| C | 2.446856  | -0.717320 | 3.192566  |
| H | 1.068785  | -1.758075 | 1.945523  |

|    |           |           |           |
|----|-----------|-----------|-----------|
| C  | 3.749085  | -0.640525 | 3.683597  |
| H  | 5.704406  | -1.531418 | 3.684015  |
| H  | 1.714524  | 0.022664  | 3.488543  |
| H  | 4.025981  | 0.155702  | 4.362341  |
| O  | 1.207473  | -4.033092 | 1.111753  |
| Si | 0.407685  | -5.463477 | 0.470750  |
| C  | 0.645542  | -6.952329 | 1.576872  |
| H  | 1.624809  | -7.427291 | 1.369926  |
| H  | 0.589503  | -6.640098 | 2.639627  |
| H  | -0.155048 | -7.691588 | 1.370213  |
| C  | -1.421222 | -5.086868 | 0.499767  |
| H  | -1.634084 | -4.224507 | -0.164330 |
| H  | -1.988491 | -5.972509 | 0.146833  |
| H  | -1.729994 | -4.838917 | 1.535928  |
| C  | 0.803572  | -5.954747 | -1.292503 |
| H  | 1.861872  | -6.263860 | -1.384685 |
| H  | 0.164071  | -6.816892 | -1.571417 |
| H  | 0.581443  | -5.116418 | -1.983177 |

*Iminium Ion C* (derived from crotonaldehyde and catalyst **4a**) - *conformation 2*

E(M06-2X/6-311++G(d,p)) = -1352.97248625

Number of Negative Frequencies = 0

|   |           |           |           |
|---|-----------|-----------|-----------|
| C | 0.866319  | -1.905373 | -1.009493 |
| H | 0.289113  | -2.816258 | -1.123238 |
| C | 0.135983  | -0.683376 | -1.186698 |
| H | 0.610506  | 0.282333  | -1.050559 |
| C | -1.183481 | -0.762360 | -1.470279 |
| H | -1.635477 | -1.749942 | -1.577688 |
| C | -2.087292 | 0.402170  | -1.641936 |
| H | -2.904024 | 0.346061  | -0.912216 |
| H | -1.566815 | 1.354315  | -1.525238 |
| H | -2.557208 | 0.365697  | -2.632008 |
| C | 2.866371  | -3.342502 | -0.591562 |
| C | 3.084872  | -0.909379 | -0.832930 |
| C | 4.337402  | -2.897073 | -0.906003 |
| H | 2.537928  | -3.978190 | -1.412323 |
| C | 4.202648  | -1.562122 | -1.628663 |
| H | 3.435159  | -0.623111 | 0.162490  |
| H | 2.614112  | -0.058588 | -1.320001 |
| H | 4.920042  | -2.736498 | 0.006509  |
| H | 4.851318  | -3.656078 | -1.498866 |
| H | 5.122022  | -0.974338 | -1.603907 |
| H | 3.896924  | -1.690540 | -2.672646 |
| N | 2.120424  | -2.032934 | -0.712149 |
| C | 2.717097  | -4.056684 | 0.801470  |
| C | 1.466129  | -4.943023 | 1.015217  |
| C | 1.301943  | -5.576625 | 2.270061  |
| C | 0.563683  | -5.293615 | -0.016209 |
| C | 0.228708  | -6.436885 | 2.511652  |
| H | 2.012270  | -5.399491 | 3.067076  |
| C | -0.512711 | -6.150123 | 0.234287  |

|    |           |           |           |
|----|-----------|-----------|-----------|
| H  | 0.685331  | -4.956109 | -1.029259 |
| C  | -0.686844 | -6.711797 | 1.498164  |
| H  | 0.111170  | -6.894503 | 3.485373  |
| H  | -1.202578 | -6.396321 | -0.562720 |
| H  | -1.517841 | -7.379555 | 1.684866  |
| C  | 3.881556  | -5.064805 | 0.911042  |
| C  | 3.997779  | -6.115680 | -0.027442 |
| C  | 4.844997  | -4.984985 | 1.943386  |
| C  | 5.041129  | -7.040588 | 0.057824  |
| H  | 3.276882  | -6.219443 | -0.828007 |
| C  | 5.885622  | -5.915078 | 2.021327  |
| H  | 4.802337  | -4.210089 | 2.696690  |
| C  | 5.984565  | -6.939906 | 1.080054  |
| H  | 5.116806  | -7.837980 | -0.670096 |
| H  | 6.616914  | -5.841324 | 2.815957  |
| H  | 6.791643  | -7.658174 | 1.144485  |
| O  | 2.900598  | -3.071775 | 1.826087  |
| Si | 1.548343  | -2.255084 | 2.609119  |
| C  | 1.731369  | -2.559045 | 4.443366  |
| H  | 1.565001  | -3.631794 | 4.666703  |
| H  | 2.752775  | -2.269365 | 4.764664  |
| H  | 0.984783  | -1.951710 | 4.995027  |
| C  | 1.725167  | -0.407951 | 2.392952  |
| H  | 1.395345  | -0.109562 | 1.379802  |
| H  | 1.088578  | 0.109874  | 3.139274  |
| H  | 2.783388  | -0.114970 | 2.549322  |
| C  | -0.227678 | -2.701717 | 2.183576  |
| H  | -0.376479 | -2.835679 | 1.100943  |
| H  | -0.529951 | -3.624007 | 2.716619  |
| H  | -0.888848 | -1.880212 | 2.527085  |

*Iminium Ion C* (derived from crotonaldehyde and catalyst **4a**) - *conformation 3*

E(M06-2X/6-311++G(d,p)) = -1352.96410802

Number of Negative Frequencies = 0

|   |           |           |           |
|---|-----------|-----------|-----------|
| C | 0.891273  | -1.871832 | -0.950231 |
| H | 0.347156  | -2.816448 | -0.991035 |
| C | 0.138761  | -0.675348 | -1.184274 |
| H | 0.603764  | 0.300564  | -1.089181 |
| C | -1.179990 | -0.786468 | -1.460885 |
| H | -1.616293 | -1.785025 | -1.523124 |
| C | -2.101980 | 0.355144  | -1.682564 |
| H | -2.920722 | 0.315826  | -0.954053 |
| H | -1.597059 | 1.319485  | -1.603740 |
| H | -2.567148 | 0.270249  | -2.671914 |
| C | 2.873849  | -3.278956 | -0.473591 |
| C | 3.112560  | -0.852596 | -0.866525 |
| C | 4.327423  | -2.943862 | -0.919134 |
| H | 2.420284  | -3.889483 | -1.261553 |
| C | 4.229383  | -1.575166 | -1.612593 |
| H | 3.427214  | -0.438279 | 0.094016  |
| H | 2.643409  | -0.063899 | -1.452942 |

|    |           |           |           |
|----|-----------|-----------|-----------|
| H  | 5.070019  | -2.881780 | -0.132157 |
| H  | 4.698536  | -3.691773 | -1.617158 |
| H  | 5.170062  | -1.023180 | -1.574300 |
| H  | 3.941767  | -1.687389 | -2.663031 |
| N  | 2.151412  | -1.954586 | -0.651646 |
| C  | 2.610266  | -4.029965 | 0.903683  |
| C  | 3.650392  | -3.872591 | 2.041498  |
| C  | 3.737189  | -4.877693 | 3.034753  |
| C  | 4.374744  | -2.680379 | 2.265007  |
| C  | 4.605768  | -4.748658 | 4.121487  |
| H  | 3.131016  | -5.771962 | 2.972975  |
| C  | 5.243142  | -2.554571 | 3.352772  |
| H  | 4.257264  | -1.826797 | 1.622476  |
| C  | 5.369704  | -3.593538 | 4.272503  |
| H  | 4.675818  | -5.541844 | 4.854566  |
| H  | 5.803529  | -1.639257 | 3.493437  |
| H  | 6.038367  | -3.491835 | 5.117470  |
| C  | 1.270634  | -3.543339 | 1.512414  |
| C  | 1.160917  | -2.270320 | 2.125669  |
| C  | 0.102410  | -4.345064 | 1.460472  |
| C  | -0.051569 | -1.827645 | 2.659870  |
| H  | 1.999719  | -1.594150 | 2.164787  |
| C  | -1.105729 | -3.893604 | 1.998745  |
| H  | 0.102396  | -5.318447 | 0.989360  |
| C  | -1.182651 | -2.638318 | 2.598337  |
| H  | -0.115189 | -0.847594 | 3.114847  |
| H  | -1.987550 | -4.519019 | 1.944900  |
| H  | -2.121431 | -2.290808 | 3.009824  |
| O  | 2.420941  | -5.422212 | 0.630032  |
| Si | 3.718231  | -6.386656 | -0.052658 |
| C  | 3.430879  | -8.120185 | 0.578203  |
| H  | 3.518442  | -8.129661 | 1.684041  |
| H  | 2.414768  | -8.455909 | 0.286006  |
| H  | 4.186770  | -8.804876 | 0.141671  |
| C  | 3.549608  | -6.512747 | -1.913413 |
| H  | 3.741813  | -5.544553 | -2.408826 |
| H  | 4.275429  | -7.260404 | -2.293700 |
| H  | 2.521242  | -6.846185 | -2.161685 |
| C  | 5.481301  | -5.987459 | 0.452829  |
| H  | 5.614840  | -6.167285 | 1.537739  |
| H  | 6.165718  | -6.665740 | -0.096335 |
| H  | 5.761030  | -4.950158 | 0.216082  |

H<sub>2</sub>O

E(M06-2X/6-311++G(d,p) = -76.4253004768

Number of Negative Frequencies = 0

|   |            |            |            |
|---|------------|------------|------------|
| O | 0.98520200 | 1.06520700 | 0.00000000 |
| H | 1.95160400 | 1.09942400 | 0.00000000 |
| H | 0.69479800 | 1.98768100 | 0.00000000 |

**TSI** (Figure 4 in the main manuscript)

E(M06-2X/6-311++G(d,p) = -1968.79114978

Number of Negative Frequencies = 1

|   |           |           |           |
|---|-----------|-----------|-----------|
| C | -0.072257 | 3.488998  | -0.203340 |
| C | 1.078417  | 2.787372  | -0.743494 |
| C | 1.496822  | 3.164983  | -2.096547 |
| C | 0.680099  | 4.113943  | -2.834322 |
| C | -0.411696 | 4.695989  | -2.282736 |
| C | -0.792816 | 4.377538  | -0.930191 |
| H | -0.362449 | 3.254674  | 0.817691  |
| H | 1.005423  | 4.398442  | -3.829160 |
| H | -0.979102 | 5.434340  | -2.840458 |
| H | -1.656558 | 4.866341  | -0.489885 |
| C | 1.546483  | 1.699818  | -0.037952 |
| H | 2.437267  | 1.147965  | -0.304367 |
| C | 2.604212  | 2.635098  | -2.737699 |
| O | 2.660371  | 2.774650  | -4.083256 |
| H | 3.578473  | 2.665820  | -4.383758 |
| C | 0.762934  | -0.097269 | -2.367157 |
| C | 0.284073  | 0.004388  | -1.074507 |
| H | 1.162978  | 1.538363  | 0.965609  |
| C | 3.805132  | 2.029057  | -2.129987 |
| C | 4.443114  | 2.664779  | -1.056020 |
| C | 4.369866  | 0.873526  | -2.685009 |
| C | 5.616879  | 2.134616  | -0.534520 |
| H | 4.012330  | 3.570518  | -0.637793 |
| C | 5.542169  | 0.340348  | -2.154268 |
| H | 3.875882  | 0.377257  | -3.518674 |
| C | 6.164064  | 0.969441  | -1.077190 |
| H | 6.112392  | 2.633867  | 0.292078  |
| H | 5.967783  | -0.563542 | -2.578734 |
| H | 7.080087  | 0.557893  | -0.665008 |
| C | 0.275124  | 0.777957  | -3.356288 |
| H | -0.379312 | 1.578679  | -3.015638 |
| H | 1.498053  | -0.861300 | -2.604762 |
| C | 1.345474  | -0.267563 | -5.309449 |
| C | -0.015921 | 1.738338  | -5.634778 |
| C | 1.940679  | 0.513474  | -6.473895 |
| H | 0.732162  | -1.110950 | -5.650082 |
| H | 2.091689  | -0.646035 | -4.609656 |
| C | 0.794887  | 1.429841  | -6.925979 |
| H | 0.336908  | 2.695053  | -5.240600 |
| H | 2.790420  | 1.104588  | -6.119672 |
| H | 2.290729  | -0.142180 | -7.273686 |
| H | 1.176264  | 2.358689  | -7.355741 |
| H | 0.222060  | 0.942752  | -7.711015 |
| C | -1.579435 | 1.780958  | -5.759556 |
| N | 0.479853  | 0.719587  | -4.652271 |
| C | 0.562688  | -1.061310 | -0.055770 |
| H | 0.420884  | -0.705645 | 0.965924  |
| H | -0.139330 | -1.890040 | -0.214417 |
| H | 1.576676  | -1.458245 | -0.158520 |
| H | -0.584447 | 0.636827  | -0.899277 |

|    |           |           |            |
|----|-----------|-----------|------------|
| C  | -1.952587 | 2.579236  | -7.039041  |
| C  | -2.921211 | 2.142630  | -7.974215  |
| C  | -1.362320 | 3.847380  | -7.253988  |
| C  | -3.229584 | 2.909913  | -9.101124  |
| H  | -3.469803 | 1.225137  | -7.842509  |
| C  | -1.674905 | 4.608159  | -8.382996  |
| H  | -0.665447 | 4.262900  | -6.539289  |
| C  | -2.601591 | 4.136291  | -9.310113  |
| H  | -3.968535 | 2.556449  | -9.808706  |
| H  | -1.204961 | 5.571644  | -8.532219  |
| H  | -2.846527 | 4.729259  | -10.181749 |
| C  | -2.090656 | 0.314379  | -5.711956  |
| C  | -1.961848 | -0.558916 | -6.818069  |
| C  | -2.533614 | -0.247850 | -4.490392  |
| C  | -2.330497 | -1.903466 | -6.724256  |
| H  | -1.598160 | -0.210543 | -7.770994  |
| C  | -2.898011 | -1.593208 | -4.402067  |
| H  | -2.584497 | 0.344474  | -3.587279  |
| C  | -2.802839 | -2.419131 | -5.519440  |
| H  | -2.242351 | -2.548916 | -7.588662  |
| H  | -3.242706 | -1.998337 | -3.459421  |
| H  | -3.082843 | -3.462160 | -5.448358  |
| O  | -2.016838 | 2.502582  | -4.605072  |
| Si | -3.697477 | 3.008712  | -4.502354  |
| C  | -4.980722 | 1.731992  | -4.989127  |
| H  | -5.002423 | 0.913161  | -4.242582  |
| H  | -5.977775 | 2.217526  | -5.003783  |
| H  | -4.774858 | 1.317517  | -5.991087  |
| C  | -4.002939 | 4.590874  | -5.451526  |
| H  | -3.150765 | 5.284568  | -5.299649  |
| H  | -4.126642 | 4.373434  | -6.530378  |
| H  | -4.932882 | 5.065950  | -5.077755  |
| C  | -4.020102 | 3.405132  | -2.707664  |
| H  | -3.402365 | 4.273986  | -2.405156  |
| H  | -5.092593 | 3.652098  | -2.569107  |
| H  | -3.757097 | 2.527054  | -2.082678  |

*Intermediate D* (the precursor of the cycloaddition adduct **2b**)

E(M06-2X/6-311++G(d,p)) = -1968.88215506

Number of Negative Frequencies = 0

|   |           |          |           |
|---|-----------|----------|-----------|
| C | 0.248553  | 4.471989 | -1.035630 |
| C | 0.930527  | 3.278119 | -1.273344 |
| C | 1.918310  | 3.243156 | -2.270984 |
| C | 2.204493  | 4.388008 | -3.012488 |
| C | 1.524974  | 5.579441 | -2.756715 |
| C | 0.543021  | 5.620135 | -1.770436 |
| H | -0.522231 | 4.501944 | -0.268989 |
| H | 2.948197  | 4.348908 | -3.802589 |
| H | 1.758512  | 6.468954 | -3.333461 |
| H | 0.003893  | 6.541562 | -1.573349 |
| C | 0.650697  | 2.021923 | -0.487345 |

|    |           |           |           |
|----|-----------|-----------|-----------|
| H  | 1.450217  | 1.878810  | 0.251850  |
| C  | 2.576597  | 1.904386  | -2.574757 |
| O  | 3.138666  | 1.892375  | -3.890447 |
| H  | 4.058305  | 2.197010  | -3.839002 |
| C  | 1.423166  | 0.848488  | -2.656358 |
| C  | 0.568292  | 0.745389  | -1.357889 |
| H  | -0.277514 | 2.128912  | 0.082469  |
| C  | 3.642563  | 1.472109  | -1.571517 |
| C  | 3.999394  | 2.253874  | -0.471498 |
| C  | 4.319597  | 0.266179  | -1.797231 |
| C  | 5.001638  | 1.825642  | 0.400271  |
| H  | 3.499996  | 3.202404  | -0.291479 |
| C  | 5.319626  | -0.160152 | -0.930322 |
| H  | 4.071905  | -0.341572 | -2.665231 |
| C  | 5.658967  | 0.619015  | 0.176873  |
| H  | 5.269926  | 2.442013  | 1.252678  |
| H  | 5.834798  | -1.097340 | -1.117376 |
| H  | 6.437636  | 0.287870  | 0.857003  |
| C  | 0.544145  | 1.304391  | -3.769019 |
| H  | -0.136423 | 2.118435  | -3.530951 |
| H  | 1.860306  | -0.126162 | -2.887326 |
| C  | 1.484950  | -0.083544 | -5.563971 |
| C  | -0.383800 | 1.441963  | -6.049554 |
| C  | 1.750044  | 0.577181  | -6.907355 |
| H  | 1.003666  | -1.060827 | -5.673245 |
| H  | 2.363111  | -0.152821 | -4.927363 |
| C  | 0.361649  | 1.049927  | -7.363279 |
| H  | -0.311580 | 2.516143  | -5.923319 |
| H  | 2.424478  | 1.425587  | -6.753770 |
| H  | 2.210339  | -0.111147 | -7.618312 |
| H  | 0.455836  | 1.911154  | -8.025747 |
| H  | -0.126305 | 0.265928  | -7.936553 |
| N  | 0.509379  | 0.862297  | -4.970765 |
| C  | 0.954317  | -0.491261 | -0.545280 |
| H  | 0.338330  | -0.552353 | 0.357174  |
| H  | 0.804247  | -1.412124 | -1.118641 |
| H  | 2.004121  | -0.441503 | -0.236243 |
| H  | -0.479009 | 0.622735  | -1.667523 |
| C  | -1.866970 | 0.964294  | -5.884955 |
| C  | -2.834815 | 1.463008  | -6.984848 |
| C  | -1.852957 | -0.584914 | -5.891433 |
| O  | -2.357372 | 1.345142  | -4.595509 |
| C  | -4.142934 | 0.929277  | -7.037057 |
| C  | -2.491958 | 2.465031  | -7.920043 |
| C  | -1.990356 | -1.334540 | -7.085071 |
| C  | -1.677627 | -1.300680 | -4.682875 |
| Si | -2.875629 | 2.998348  | -4.286830 |
| C  | -5.051295 | 1.344973  | -8.013436 |
| H  | -4.460547 | 0.187572  | -6.314754 |
| C  | -3.407434 | 2.879320  | -8.891916 |
| H  | -1.535977 | 2.960138  | -7.896609 |



|   |           |           |           |
|---|-----------|-----------|-----------|
| C | -1.951381 | -2.731057 | -7.065470 |
| H | -2.131452 | -0.845068 | -8.039512 |
| C | -1.637676 | -2.697055 | -4.672539 |
| H | -1.551333 | -0.783290 | -3.740951 |
| C | -4.598923 | 3.329627  | -4.932982 |
| C | -2.986073 | 3.154460  | -2.429973 |
| C | -1.743667 | 4.378022  | -4.857922 |
| C | -4.682080 | 2.315682  | -8.943472 |
| H | -6.045695 | 0.918831  | -8.042935 |
| H | -3.129759 | 3.647894  | -9.601687 |
| C | -1.774444 | -3.411401 | -5.861662 |
| H | -2.057957 | -3.286926 | -7.988068 |
| H | -1.495660 | -3.225923 | -3.738878 |
| H | -4.563071 | 3.554103  | -6.017221 |
| H | -5.243237 | 2.446179  | -4.747100 |
| H | -5.022547 | 4.208357  | -4.405138 |
| H | -2.007604 | 2.896421  | -1.979497 |
| H | -3.257313 | 4.194969  | -2.157511 |
| H | -3.758744 | 2.456976  | -2.046948 |
| H | -1.695190 | 4.408819  | -5.963346 |
| H | -2.154848 | 5.344018  | -4.500327 |
| H | -0.730048 | 4.251120  | -4.428318 |
| H | -5.388257 | 2.640891  | -9.696393 |
| H | -1.742273 | -4.493180 | -5.850448 |

## TS2

$E(M06-2X/6-311++G(d,p) = -1968.78699666$

Number of Negative Frequencies = 1

|   |           |           |           |
|---|-----------|-----------|-----------|
| C | -0.183714 | 2.250055  | 0.557814  |
| C | 0.991902  | 1.793802  | -0.173281 |
| C | 1.505666  | 2.706328  | -1.206622 |
| C | 0.825352  | 3.979596  | -1.389895 |
| C | -0.271700 | 4.332362  | -0.677441 |
| C | -0.802645 | 3.428729  | 0.310921  |
| H | -0.570040 | 1.585651  | 1.326631  |
| H | 1.271221  | 4.726532  | -2.045454 |
| H | -0.719617 | 5.312771  | -0.806606 |
| H | -1.678334 | 3.717234  | 0.883693  |
| C | 1.379210  | 0.493984  | 0.030592  |
| H | 2.261829  | 0.044658  | -0.401265 |
| C | 2.538811  | 2.392733  | -2.084827 |
| O | 2.672407  | 3.048481  | -3.256089 |
| H | 1.880144  | 3.582285  | -3.431186 |
| C | 0.523527  | 0.147329  | -3.007493 |
| C | 0.150515  | -0.548810 | -1.883835 |
| H | 0.873141  | -0.079990 | 0.802222  |
| C | 3.656642  | 1.458881  | -1.877064 |
| C | 4.137223  | 0.685472  | -2.939801 |
| C | 4.315951  | 1.422040  | -0.640648 |
| C | 5.229966  | -0.156741 | -2.756475 |
| H | 3.654286  | 0.750421  | -3.910817 |

|    |           |           |           |
|----|-----------|-----------|-----------|
| C  | 5.416179  | 0.593127  | -0.464509 |
| H  | 3.959810  | 2.044514  | 0.176144  |
| C  | 5.867570  | -0.205958 | -1.517777 |
| H  | 5.591053  | -0.763556 | -3.580983 |
| H  | 5.929251  | 0.573403  | 0.491865  |
| H  | 6.725059  | -0.856599 | -1.374977 |
| C  | -0.092163 | 1.388667  | -3.279407 |
| H  | 1.260686  | -0.273194 | -3.685119 |
| C  | 0.814114  | 1.691390  | -5.545027 |
| C  | -0.739014 | 3.374381  | -4.661068 |
| C  | 1.134383  | 3.022091  | -6.214387 |
| H  | 0.230818  | 1.026734  | -6.193882 |
| H  | 1.705266  | 1.165195  | -5.201016 |
| C  | -0.130982 | 3.866574  | -6.006533 |
| H  | -0.406705 | 4.056951  | -3.870458 |
| H  | 2.003630  | 3.476434  | -5.727749 |
| H  | 1.377830  | 2.897969  | -7.271244 |
| H  | 0.108036  | 4.930458  | -5.938261 |
| H  | -0.792565 | 3.764469  | -6.862054 |
| H  | -0.729535 | 1.798769  | -2.496089 |
| N  | -0.016296 | 2.082174  | -4.392203 |
| C  | 0.615271  | -1.946239 | -1.621508 |
| H  | 0.633730  | -2.177990 | -0.554856 |
| H  | -0.083367 | -2.649124 | -2.094262 |
| H  | 1.609121  | -2.120983 | -2.043240 |
| H  | -0.702997 | -0.189176 | -1.312546 |
| C  | -2.301191 | 3.250067  | -4.575013 |
| C  | -2.930157 | 4.507615  | -5.233972 |
| C  | -2.707764 | 1.888448  | -5.207630 |
| O  | -2.583872 | 3.252247  | -3.174342 |
| C  | -3.963339 | 4.447108  | -6.198099 |
| C  | -2.496382 | 5.788150  | -4.818621 |
| C  | -2.657297 | 1.669155  | -6.604981 |
| C  | -2.984214 | 0.767654  | -4.386549 |
| Si | -4.241999 | 3.449590  | -2.628198 |
| C  | -4.493789 | 5.613220  | -6.756949 |
| H  | -4.409253 | 3.511604  | -6.496324 |
| C  | -3.029147 | 6.949410  | -5.383149 |
| H  | -1.749517 | 5.894712  | -4.043674 |
| C  | -2.931731 | 0.412568  | -7.150970 |
| H  | -2.435382 | 2.467592  | -7.292762 |
| C  | -3.254470 | -0.486538 | -4.938311 |
| H  | -2.966448 | 0.842716  | -3.309898 |
| C  | -4.435191 | 2.408677  | -1.089394 |
| C  | -4.519649 | 5.225536  | -2.120351 |
| C  | -5.615883 | 2.943635  | -3.801951 |
| C  | -4.021595 | 6.862047  | -6.357176 |
| H  | -5.285352 | 5.547326  | -7.492281 |
| H  | -2.677579 | 7.919431  | -5.056224 |
| C  | -3.233631 | -0.663200 | -6.319411 |
| H  | -2.905378 | 0.272869  | -8.224002 |

|   |           |           |           |
|---|-----------|-----------|-----------|
| H | -3.466718 | -1.327038 | -4.290154 |
| H | -4.333362 | 1.335178  | -1.347124 |
| H | -3.653327 | 2.686625  | -0.354807 |
| H | -5.436464 | 2.585934  | -0.646181 |
| H | -4.636468 | 5.861792  | -3.019951 |
| H | -5.443035 | 5.292826  | -1.509543 |
| H | -3.653929 | 5.577738  | -1.522676 |
| H | -5.346373 | 2.045619  | -4.387627 |
| H | -6.521720 | 2.713226  | -3.204992 |
| H | -5.865670 | 3.782198  | -4.479361 |
| H | -4.437602 | 7.762805  | -6.789551 |
| H | -3.440677 | -1.636541 | -6.744982 |

*Enammonium ion intermediate F*

E(M06-2X/6-311++G(d,p) = -1968.85589687

Number of Negative Frequencies = 0

|   |           |           |           |
|---|-----------|-----------|-----------|
| C | -1.604808 | 0.094697  | 2.952941  |
| C | -0.615200 | -0.248963 | 2.025251  |
| C | 0.057319  | 0.802879  | 1.370173  |
| C | -0.299705 | 2.135633  | 1.610018  |
| C | -1.292392 | 2.449618  | 2.533227  |
| C | -1.939056 | 1.421678  | 3.215520  |
| H | -2.126885 | -0.700935 | 3.479204  |
| H | 0.229625  | 2.926980  | 1.085196  |
| H | -1.548361 | 3.486535  | 2.726898  |
| H | -2.707172 | 1.649176  | 3.948417  |
| C | -0.395566 | -1.708552 | 1.694484  |
| H | 0.626174  | -1.882553 | 1.342839  |
| C | 1.173076  | 0.603149  | 0.385940  |
| O | 1.056740  | 1.047667  | -0.759451 |
| H | -0.485260 | 1.048782  | -1.652327 |
| C | -1.162065 | -1.562516 | -0.686121 |
| C | -1.385418 | -2.275844 | 0.624914  |
| H | -1.091930 | -3.321118 | 0.479718  |
| C | -2.845726 | -2.263724 | 1.078040  |
| H | -3.480660 | -2.745153 | 0.328904  |
| H | -2.956015 | -2.811179 | 2.019398  |
| H | -3.222090 | -1.251397 | 1.237163  |
| H | -0.521706 | -2.307560 | 2.603865  |
| C | 2.431097  | -0.051401 | 0.811568  |
| C | 3.366445  | -0.415009 | -0.167181 |
| C | 2.711589  | -0.279083 | 2.166036  |
| C | 4.563029  | -1.014289 | 0.203596  |
| H | 3.142890  | -0.214582 | -1.210684 |
| C | 3.915961  | -0.870305 | 2.533941  |
| H | 1.996861  | 0.019404  | 2.928289  |
| C | 4.836952  | -1.241710 | 1.554535  |
| H | 5.286291  | -1.300831 | -0.553476 |
| H | 4.138585  | -1.037934 | 3.582875  |
| H | 5.775080  | -1.705655 | 1.844607  |
| C | -1.650155 | -0.352885 | -0.940150 |

|    |           |           |           |
|----|-----------|-----------|-----------|
| H  | -0.489954 | -2.041883 | -1.393836 |
| C  | -0.468867 | -0.270347 | -3.170129 |
| C  | -2.184907 | 1.466900  | -2.750206 |
| C  | -0.369636 | 0.729298  | -4.323350 |
| H  | -1.015916 | -1.176974 | -3.430252 |
| H  | 0.499981  | -0.547270 | -2.752036 |
| C  | -1.347520 | 1.880973  | -3.993732 |
| H  | -2.200053 | 2.299155  | -2.058369 |
| H  | 0.648055  | 1.112688  | -4.415339 |
| H  | -0.617409 | 0.240124  | -5.266671 |
| H  | -0.773082 | 2.769969  | -3.719300 |
| H  | -1.940932 | 2.164774  | -4.860163 |
| H  | -2.258465 | 0.203186  | -0.234154 |
| N  | -1.228840 | 0.455444  | -2.090364 |
| C  | -3.654757 | 0.956866  | -2.971220 |
| C  | -4.566906 | 1.950295  | -3.734457 |
| C  | -3.594529 | -0.352084 | -3.791556 |
| O  | -4.243627 | 0.627739  | -1.708225 |
| C  | -5.828391 | 1.508461  | -4.196154 |
| C  | -4.218792 | 3.302826  | -3.957407 |
| C  | -3.399659 | -0.330307 | -5.192619 |
| C  | -3.758488 | -1.613446 | -3.169559 |
| Si | -4.869840 | 1.891843  | -0.653896 |
| C  | -6.683012 | 2.368972  | -4.889321 |
| H  | -6.154243 | 0.492153  | -4.013301 |
| C  | -5.080549 | 4.158667  | -4.649391 |
| H  | -3.292887 | 3.718420  | -3.591209 |
| C  | -3.337535 | -1.515973 | -5.928780 |
| H  | -3.311786 | 0.604035  | -5.727538 |
| C  | -3.693060 | -2.794579 | -3.912977 |
| H  | -3.920668 | -1.700194 | -2.104062 |
| C  | -6.543699 | 2.514872  | -1.210815 |
| C  | -5.159740 | 1.096263  | 1.008577  |
| C  | -3.751610 | 3.354530  | -0.316882 |
| C  | -6.307544 | 3.691655  | -5.119715 |
| H  | -7.641773 | 2.010571  | -5.240951 |
| H  | -4.797986 | 5.190310  | -4.814972 |
| C  | -3.478997 | -2.746541 | -5.289535 |
| H  | -3.184179 | -1.479062 | -6.999552 |
| H  | -3.807961 | -3.750445 | -3.418301 |
| H  | -6.424751 | 3.268470  | -2.013512 |
| H  | -7.156619 | 1.664342  | -1.572822 |
| H  | -7.057352 | 2.995411  | -0.353257 |
| H  | -4.184666 | 0.875367  | 1.482947  |
| H  | -5.728825 | 1.791205  | 1.659386  |
| H  | -5.733498 | 0.156255  | 0.876212  |
| H  | -3.626811 | 3.969595  | -1.228594 |
| H  | -4.215926 | 3.984317  | 0.469193  |
| H  | -2.768052 | 3.000166  | 0.051192  |
| H  | -6.972594 | 4.358376  | -5.653118 |
| H  | -3.429708 | -3.663468 | -5.862407 |

**TS3**

E(M06-2X/6-311++G(d,p) = -1022.9224926

Number of Negative Frequencies = 1

|   |           |           |           |
|---|-----------|-----------|-----------|
| C | -1.807385 | -0.110852 | 2.842250  |
| C | -0.894686 | -0.762621 | 2.005743  |
| C | 0.156882  | 0.016310  | 1.471390  |
| C | 0.239634  | 1.397271  | 1.732919  |
| C | -0.719539 | 2.023270  | 2.515019  |
| C | -1.736097 | 1.257829  | 3.086864  |
| H | -2.592473 | -0.697827 | 3.311554  |
| H | 1.048707  | 1.977623  | 1.298088  |
| H | -0.663142 | 3.091963  | 2.695382  |
| H | -2.473488 | 1.726843  | 3.732006  |
| C | -1.080556 | -2.235151 | 1.729497  |
| H | -0.123196 | -2.720237 | 1.510063  |
| C | 1.214082  | -0.567477 | 0.631834  |
| O | 0.932875  | -1.362448 | -0.320505 |
| H | -0.245650 | -1.519687 | -0.808249 |
| C | -1.650795 | -1.926133 | -0.762394 |
| C | -2.077922 | -2.532355 | 0.569567  |
| H | -2.040132 | -3.619757 | 0.440900  |
| C | -3.519870 | -2.178228 | 0.947753  |
| H | -4.201890 | -2.491634 | 0.150906  |
| H | -3.819555 | -2.688515 | 1.870350  |
| H | -3.663309 | -1.103131 | 1.100236  |
| H | -1.465967 | -2.708595 | 2.639428  |
| C | 2.622888  | -0.264231 | 0.841363  |
| C | 3.544096  | -0.525072 | -0.191542 |
| C | 3.074315  | 0.229277  | 2.078609  |
| C | 4.892132  | -0.271342 | 0.006484  |
| H | 3.189398  | -0.910655 | -1.141756 |
| C | 4.429185  | 0.467180  | 2.271265  |
| H | 2.374400  | 0.393124  | 2.892194  |
| C | 5.333799  | 0.224420  | 1.237134  |
| H | 5.603085  | -0.459511 | -0.791512 |
| H | 4.781436  | 0.836208  | 3.228926  |
| H | 6.391999  | 0.414345  | 1.392346  |
| C | -1.981268 | -0.636519 | -1.120025 |
| H | -1.380008 | -2.622646 | -1.555567 |
| C | -1.136444 | -0.710864 | -3.433955 |
| C | -2.275330 | 1.292839  | -2.637379 |
| C | -0.676019 | 0.451876  | -4.310413 |
| H | -1.888423 | -1.337954 | -3.935322 |
| H | -0.312438 | -1.357043 | -3.114233 |
| C | -1.724818 | 1.546206  | -4.058007 |
| H | -1.886041 | 2.028600  | -1.922942 |
| H | 0.319383  | 0.805020  | -3.961651 |
| H | -0.608362 | 0.169590  | -5.363392 |
| H | -1.296083 | 2.547373  | -4.144677 |
| H | -2.540283 | 1.474003  | -4.785871 |

|    |           |           |           |
|----|-----------|-----------|-----------|
| H  | -2.427547 | 0.026967  | -0.375426 |
| N  | -1.722474 | -0.033379 | -2.283234 |
| C  | -3.870010 | 1.397003  | -2.532563 |
| C  | -4.342978 | 2.673657  | -3.289179 |
| C  | -4.499526 | 0.065851  | -3.047340 |
| O  | -4.121817 | 1.560388  | -1.133043 |
| C  | -5.447124 | 2.686810  | -4.175563 |
| C  | -3.691025 | 3.905961  | -3.043047 |
| C  | -4.565568 | -0.268015 | -4.424023 |
| C  | -4.938305 | -0.914496 | -2.130230 |
| Si | -5.714499 | 2.060813  | -0.579289 |
| C  | -5.834465 | 3.861610  | -4.826174 |
| H  | -6.039992 | 1.807542  | -4.363633 |
| C  | -4.082700 | 5.075600  | -3.698835 |
| H  | -2.884123 | 3.976022  | -2.328039 |
| C  | -5.058667 | -1.504900 | -4.848272 |
| H  | -4.290105 | 0.429339  | -5.195498 |
| C  | -5.432569 | -2.148646 | -2.558896 |
| H  | -4.902065 | -0.730275 | -1.070159 |
| C  | -7.181145 | 1.191331  | -1.358469 |
| C  | -5.773597 | 1.651675  | 1.241245  |
| C  | -5.950933 | 3.911487  | -0.709800 |
| C  | -5.148466 | 5.052102  | -4.595352 |
| H  | -6.677915 | 3.849685  | -5.504498 |
| H  | -3.564764 | 6.005143  | -3.500951 |
| C  | -5.489717 | -2.445389 | -3.917144 |
| H  | -5.112262 | -1.730929 | -5.905520 |
| H  | -5.768787 | -2.878263 | -1.833739 |
| H  | -7.124638 | 1.218433  | -2.460225 |
| H  | -7.226316 | 0.139203  | -1.012921 |
| H  | -8.110624 | 1.703902  | -1.036925 |
| H  | -4.935229 | 2.159392  | 1.761139  |
| H  | -6.738103 | 1.994397  | 1.668720  |
| H  | -5.678839 | 0.554635  | 1.375269  |
| H  | -6.232616 | 4.188973  | -1.744451 |
| H  | -6.767081 | 4.223398  | -0.026559 |
| H  | -5.013219 | 4.427833  | -0.419415 |
| H  | -5.453953 | 5.960354  | -5.098462 |
| H  | -5.872015 | -3.402187 | -4.248432 |

*Iminium ion adduct E*, the precursor of the Michael product **5b**

E(M06-2X/6-311++G(d,p) = -1968.87401975

Number of Negative Frequencies = 0

|   |           |          |           |
|---|-----------|----------|-----------|
| C | -1.857411 | 4.173067 | 0.164988  |
| C | -0.677779 | 3.512177 | -0.193646 |
| C | 0.433441  | 4.288752 | -0.561469 |
| C | 0.350361  | 5.684115 | -0.575193 |
| C | -0.830477 | 6.322765 | -0.207898 |
| C | -1.937841 | 5.562901 | 0.166168  |
| H | -2.724177 | 3.583212 | 0.457343  |
| H | 1.221086  | 6.266680 | -0.865173 |

|    |           |           |           |
|----|-----------|-----------|-----------|
| H  | -0.883857 | 7.406944  | -0.208553 |
| H  | -2.861005 | 6.051933  | 0.462096  |
| C  | -0.667732 | 2.000219  | -0.255547 |
| H  | 0.352285  | 1.607470  | -0.145830 |
| C  | 1.741462  | 3.662685  | -0.980730 |
| O  | 2.025593  | 3.599208  | -2.169880 |
| C  | -0.450999 | 1.982331  | -2.747360 |
| C  | -1.268661 | 1.451162  | -1.566872 |
| H  | -1.247047 | 1.595622  | 0.582454  |
| C  | 2.659958  | 3.150588  | 0.069558  |
| C  | 3.850920  | 2.523118  | -0.321195 |
| C  | 2.357183  | 3.288718  | 1.429879  |
| C  | 4.726410  | 2.035067  | 0.639995  |
| H  | 4.074914  | 2.435610  | -1.380140 |
| C  | 3.237988  | 2.798922  | 2.390769  |
| H  | 1.441294  | 3.786858  | 1.736487  |
| C  | 4.419111  | 2.172404  | 1.996261  |
| H  | 5.650403  | 1.551198  | 0.338672  |
| H  | 3.006310  | 2.910901  | 3.445268  |
| H  | 5.106644  | 1.792743  | 2.746267  |
| H  | -0.390732 | 3.082557  | -2.709378 |
| C  | -0.998223 | 1.624134  | -4.076151 |
| H  | 0.586028  | 1.630649  | -2.675405 |
| H  | -2.038695 | 1.312168  | -4.159133 |
| C  | 1.046638  | 2.261635  | -5.244157 |
| C  | -0.829188 | 1.319653  | -6.539863 |
| C  | 0.973566  | 3.002608  | -6.570282 |
| H  | 1.774625  | 1.443320  | -5.270880 |
| H  | 1.243801  | 2.892415  | -4.375367 |
| C  | 0.167411  | 2.065574  | -7.483252 |
| H  | -1.798697 | 1.798072  | -6.618551 |
| H  | 0.452997  | 3.954672  | -6.426559 |
| H  | 1.966788  | 3.216942  | -6.968311 |
| H  | -0.374786 | 2.647502  | -8.229616 |
| H  | 0.838675  | 1.409039  | -8.029927 |
| N  | -0.316073 | 1.675268  | -5.161800 |
| C  | -1.288999 | -0.077519 | -1.554337 |
| H  | -1.878296 | -0.453143 | -0.713067 |
| H  | -1.725622 | -0.496552 | -2.468854 |
| H  | -0.271973 | -0.475584 | -1.456459 |
| H  | -2.297238 | 1.831663  | -1.654854 |
| C  | -0.965539 | -0.233065 | -6.711524 |
| C  | -1.416272 | -0.696459 | -8.117880 |
| C  | 0.420355  | -0.855189 | -6.402513 |
| O  | -1.857423 | -0.749246 | -5.718061 |
| C  | -1.384663 | -2.076298 | -8.424231 |
| C  | -1.896675 | 0.189524  | -9.107760 |
| C  | 1.396014  | -1.057473 | -7.409122 |
| C  | 0.756421  | -1.228214 | -5.078992 |
| Si | -3.599280 | -0.598711 | -5.916786 |
| C  | -1.775941 | -2.543602 | -9.681093 |

|   |           |           |            |
|---|-----------|-----------|------------|
| H | -1.056892 | -2.794032 | -7.682440  |
| C | -2.291059 | -0.285468 | -10.361948 |
| H | -2.002331 | 1.244833  | -8.921839  |
| C | 2.646152  | -1.599901 | -7.100512  |
| H | 1.195669  | -0.803399 | -8.441357  |
| C | 2.009619  | -1.767498 | -4.778615  |
| H | 0.058289  | -1.088184 | -4.265144  |
| C | -4.289358 | -1.922027 | -7.043499  |
| C | -4.341733 | -0.915279 | -4.232677  |
| C | -4.264391 | 1.064229  | -6.463304  |
| C | -2.224882 | -1.648258 | -10.650773 |
| H | -1.738358 | -3.602935 | -9.899578  |
| H | -2.657780 | 0.406008  | -11.109599 |
| C | 2.953385  | -1.952838 | -5.787396  |
| H | 3.378806  | -1.747099 | -7.883489  |
| H | 2.249829  | -2.039130 | -3.758747  |
| H | -4.156225 | -1.626704 | -8.102983  |
| H | -3.774143 | -2.884545 | -6.847776  |
| H | -5.374058 | -2.040604 | -6.844674  |
| H | -4.035275 | -0.110938 | -3.533408  |
| H | -5.448081 | -0.929950 | -4.311757  |
| H | -3.984853 | -1.893358 | -3.849991  |
| H | -3.930187 | 1.301086  | -7.491178  |
| H | -5.372634 | 1.020413  | -6.459306  |
| H | -3.942499 | 1.855684  | -5.756448  |
| H | -2.532947 | -2.011690 | -11.622532 |
| H | 3.923474  | -2.370872 | -5.551550  |

**TSI-H<sub>2</sub>O** (Figure 5 in the main text)

E(M06-2X/6-311++G(d,p) = -2045.23493578

Number of Negative Frequencies = 1

|   |           |           |           |
|---|-----------|-----------|-----------|
| C | -0.102487 | 2.531675  | 0.758330  |
| C | 0.981059  | 2.095442  | -0.107260 |
| C | 1.204863  | 2.891618  | -1.317602 |
| C | 0.283221  | 3.974376  | -1.613738 |
| C | -0.738941 | 4.294556  | -0.784959 |
| C | -0.932470 | 3.553007  | 0.434806  |
| H | -0.250418 | 1.980776  | 1.683798  |
| H | 0.474970  | 4.570384  | -2.499417 |
| H | -1.387273 | 5.134797  | -1.012568 |
| H | -1.741266 | 3.829665  | 1.104427  |
| C | 1.561661  | 0.877939  | 0.171745  |
| H | 2.408828  | 0.473870  | -0.365868 |
| C | 2.220161  | 2.656575  | -2.235698 |
| O | 2.095816  | 3.198889  | -3.453270 |
| H | 2.964775  | 3.236038  | -3.927474 |
| C | 0.479509  | -0.185536 | -2.508180 |
| C | 0.162701  | -0.506004 | -1.204884 |
| H | 1.315884  | 0.394294  | 1.113037  |
| C | 3.497796  | 1.951760  | -1.983950 |
| C | 3.978266  | 1.003009  | -2.894585 |



|    |           |           |           |
|----|-----------|-----------|-----------|
| C  | 4.276893  | 2.302185  | -0.874343 |
| C  | 5.212795  | 0.390834  | -2.685516 |
| H  | 3.380590  | 0.743550  | -3.766104 |
| C  | 5.513842  | 1.698332  | -0.673427 |
| H  | 3.903518  | 3.043849  | -0.173261 |
| C  | 5.980903  | 0.738250  | -1.573254 |
| H  | 5.573608  | -0.356233 | -3.386224 |
| H  | 6.116130  | 1.977258  | 0.185456  |
| H  | 6.943708  | 0.263849  | -1.410057 |
| O  | 4.426103  | 3.287522  | -4.830922 |
| H  | 4.741784  | 4.103316  | -5.247443 |
| H  | 5.183376  | 2.903640  | -4.361326 |
| C  | -0.112420 | 0.944881  | -3.107627 |
| H  | 1.175712  | -0.812783 | -3.057925 |
| C  | 0.731549  | 0.617648  | -5.396919 |
| C  | -0.634520 | 2.584165  | -4.900307 |
| C  | 1.217086  | 1.749768  | -6.294892 |
| H  | 0.074259  | -0.080543 | -5.929891 |
| H  | 1.542413  | 0.047487  | -4.941834 |
| C  | 0.059391  | 2.761660  | -6.281309 |
| H  | -0.252576 | 3.359397  | -4.232880 |
| H  | 2.126049  | 2.187723  | -5.872369 |
| H  | 1.446669  | 1.398330  | -7.303101 |
| H  | 0.430560  | 3.784747  | -6.375795 |
| H  | -0.591852 | 2.594603  | -7.135607 |
| H  | -0.723299 | 1.571720  | -2.460709 |
| N  | -0.047235 | 1.313095  | -4.365840 |
| H  | -0.665697 | 0.019173  | -0.733499 |
| C  | 0.574537  | -1.813064 | -0.596227 |
| H  | 1.571015  | -2.114822 | -0.931715 |
| H  | 0.559995  | -1.783963 | 0.494425  |
| H  | -0.134502 | -2.589081 | -0.912883 |
| C  | -2.202166 | 2.608422  | -4.871371 |
| C  | -2.695804 | 3.798310  | -5.739555 |
| C  | -2.695672 | 1.203407  | -5.313225 |
| O  | -2.535672 | 2.850132  | -3.502357 |
| C  | -3.749147 | 3.691601  | -6.678993 |
| C  | -2.133312 | 5.080436  | -5.532330 |
| C  | -2.674974 | 0.794218  | -6.667812 |
| C  | -3.004470 | 0.219535  | -4.343265 |
| Si | -4.203196 | 3.211228  | -3.081171 |
| C  | -4.167438 | 4.800877  | -7.419466 |
| H  | -4.280448 | 2.768573  | -6.839277 |
| C  | -2.556256 | 6.184286  | -6.276463 |
| H  | -1.373506 | 5.238427  | -4.779668 |
| C  | -3.023266 | -0.508315 | -7.034586 |
| H  | -2.411345 | 1.477691  | -7.458605 |
| C  | -3.349093 | -1.081649 | -4.715841 |
| H  | -2.964905 | 0.444106  | -3.286273 |
| C  | -5.513893 | 2.138453  | -3.884018 |
| C  | -4.611405 | 5.014098  | -3.364137 |

|   |           |           |           |
|---|-----------|-----------|-----------|
| C | -4.354805 | 2.921602  | -1.243895 |
| C | -3.566663 | 6.043147  | -7.225119 |
| H | -4.970654 | 4.698301  | -8.137777 |
| H | -2.106713 | 7.154184  | -6.107181 |
| C | -3.365257 | -1.443812 | -6.060647 |
| H | -3.020139 | -0.794215 | -8.078536 |
| H | -3.591390 | -1.814251 | -3.956840 |
| H | -5.451483 | 1.104971  | -3.488659 |
| H | -6.512905 | 2.549011  | -3.632049 |
| H | -5.404278 | 2.124611  | -4.982118 |
| H | -3.755747 | 5.642407  | -3.042266 |
| H | -4.831803 | 5.194456  | -4.434320 |
| H | -5.507499 | 5.282457  | -2.768144 |
| H | -3.703832 | 3.636722  | -0.702611 |
| H | -5.407746 | 3.073305  | -0.929679 |
| H | -4.042287 | 1.883764  | -1.007215 |
| H | -3.897081 | 6.900628  | -7.796878 |
| H | -3.629605 | -2.453408 | -6.347340 |

*Intermediate H*

E(M06-2X/6-311++G(d,p)) = -2045.30787183

Number of Negative Frequencies = 0

|   |           |           |           |
|---|-----------|-----------|-----------|
| C | -2.203643 | 3.849615  | 0.108026  |
| H | -3.214229 | 0.738086  | -0.513060 |
| H | -3.037806 | 2.024986  | -1.706610 |
| H | -1.190061 | 1.535726  | 0.826661  |
| C | 2.296028  | 3.276577  | -0.476497 |
| C | 3.440646  | 2.661393  | -1.000531 |
| C | 2.140910  | 3.395856  | 0.911104  |
| C | 4.408725  | 2.148282  | -0.146030 |
| H | 3.564293  | 2.602444  | -2.078043 |
| C | 3.120269  | 2.896126  | 1.763493  |
| H | 1.263242  | 3.889604  | 1.320316  |
| C | -0.965606 | 3.337184  | -0.298338 |
| C | -0.074781 | 4.220794  | -0.939024 |
| C | -0.442676 | 5.552358  | -1.177524 |
| C | -1.678931 | 6.035690  | -0.764505 |
| C | -2.562104 | 5.176560  | -0.113389 |
| H | -2.900901 | 3.187174  | 0.616016  |
| H | 0.272480  | 6.219531  | -1.654377 |
| H | -1.941693 | 7.075780  | -0.930890 |
| H | -3.525977 | 5.539739  | 0.229735  |
| C | -0.688147 | 1.862720  | -0.091057 |
| H | 0.378735  | 1.674870  | 0.054668  |
| C | 1.294361  | 3.838501  | -1.414351 |
| O | 1.601248  | 4.055387  | -2.587892 |
| H | -0.760881 | 5.371365  | -4.525108 |
| C | -0.400549 | 1.223316  | -2.495508 |
| C | -1.192687 | 0.950309  | -1.245682 |
| H | -0.935297 | -0.073234 | -0.940628 |
| C | -2.703490 | 1.017444  | -1.439491 |

|    |           |           |            |
|----|-----------|-----------|------------|
| H  | -3.025876 | 0.321541  | -2.220188  |
| C  | 4.247982  | 2.266425  | 1.236168   |
| H  | 5.292575  | 1.666423  | -0.552057  |
| H  | 3.006658  | 2.999684  | 2.837983   |
| H  | 5.008037  | 1.873037  | 1.904497   |
| O  | 0.007018  | 4.799276  | -4.666690  |
| H  | 0.547910  | 4.833844  | -3.846021  |
| H  | -0.061094 | 3.157810  | -4.734416  |
| C  | -0.902401 | 1.769030  | -3.598092  |
| H  | 0.657690  | 0.968280  | -2.444690  |
| H  | -1.933427 | 2.096008  | -3.682202  |
| C  | 1.337729  | 1.681613  | -4.764056  |
| C  | -0.669045 | 1.891006  | -6.194666  |
| C  | 1.841422  | 1.978471  | -6.177260  |
| H  | 1.393604  | 0.623696  | -4.504540  |
| H  | 1.839490  | 2.265238  | -3.990289  |
| C  | 0.587632  | 2.217238  | -7.051136  |
| H  | -1.375499 | 2.703425  | -6.313190  |
| H  | 2.474811  | 2.867429  | -6.179465  |
| H  | 2.444713  | 1.146576  | -6.544702  |
| H  | 0.534755  | 3.277543  | -7.311129  |
| H  | 0.641514  | 1.675730  | -7.992991  |
| N  | -0.104897 | 2.103036  | -4.777914  |
| C  | -1.409789 | 0.525025  | -6.428939  |
| C  | -1.870832 | 0.291885  | -7.889637  |
| C  | -0.442898 | -0.621553 | -6.053644  |
| O  | -2.529755 | 0.430912  | -5.541525  |
| C  | -2.330910 | -0.990514 | -8.268329  |
| C  | -1.896129 | 1.316883  | -8.863742  |
| C  | 0.590947  | -1.024486 | -6.931331  |
| C  | -0.577546 | -1.322232 | -4.830475  |
| Si | -4.032876 | 1.274212  | -5.902998  |
| C  | -2.754936 | -1.246324 | -9.574537  |
| H  | -2.366832 | -1.796015 | -7.545580  |
| C  | -2.324248 | 1.053813  | -10.168123 |
| H  | -1.603573 | 2.328878  | -8.630684  |
| C  | 1.470661  | -2.052289 | -6.583039  |
| H  | 0.712247  | -0.559831 | -7.898667  |
| C  | 0.308060  | -2.347451 | -4.488893  |
| H  | -1.354204 | -1.074124 | -4.120162  |
| C  | -5.047299 | 0.392704  | -7.204719  |
| C  | -5.059505 | 1.215212  | -4.345570  |
| C  | -3.906706 | 3.088741  | -6.346422  |
| C  | -2.747329 | -0.226264 | -10.524796 |
| H  | -3.097703 | -2.236005 | -9.847246  |
| H  | -2.334494 | 1.848396  | -10.903020 |
| C  | 1.333304  | -2.709016 | -5.361285  |
| H  | 2.258094  | -2.343406 | -7.266153  |
| H  | 0.198422  | -2.862241 | -3.543082  |
| H  | -4.681194 | 0.652021  | -8.217173  |
| H  | -4.987211 | -0.703251 | -7.045376  |

|   |           |           |            |
|---|-----------|-----------|------------|
| H | -6.105262 | 0.715339  | -7.122252  |
| H | -4.604072 | 1.872788  | -3.579302  |
| H | -6.086662 | 1.572300  | -4.564431  |
| H | -5.102076 | 0.173039  | -3.968158  |
| H | -3.413297 | 3.217976  | -7.328821  |
| H | -4.930536 | 3.510121  | -6.412922  |
| H | -3.351494 | 3.633725  | -5.555411  |
| H | -3.080137 | -0.424888 | -11.535302 |
| H | 2.017010  | -3.504212 | -5.093761  |

**TS3-H<sub>2</sub>O** (Figure 5 in the main text)

E(M06-2X/6-311++G(d,p)) = -2045.265914

Number of Negative Frequencies = 1

|   |           |          |           |
|---|-----------|----------|-----------|
| C | -1.661763 | 3.431141 | -0.191904 |
| C | -0.415869 | 2.790134 | -0.261255 |
| C | 0.724132  | 3.602132 | -0.333093 |
| C | 0.621739  | 5.002401 | -0.338821 |
| C | -0.625602 | 5.611993 | -0.269655 |
| C | -1.773375 | 4.816857 | -0.202247 |
| H | -2.561913 | 2.823244 | -0.134099 |
| H | 1.525211  | 5.605948 | -0.396133 |
| H | -0.702917 | 6.694629 | -0.261773 |
| H | -2.753724 | 5.280431 | -0.150199 |
| C | -0.366006 | 1.280787 | -0.327024 |
| H | 0.666152  | 0.914692 | -0.259213 |
| C | 2.086274  | 3.039869 | -0.606354 |
| O | 2.534937  | 3.198987 | -1.762146 |
| H | 0.189483  | 4.479617 | -2.854776 |
| C | -0.249507 | 1.062447 | -2.864561 |
| C | -1.011746 | 0.703895 | -1.604800 |
| H | -0.892038 | 0.874100 | 0.546510  |
| C | 2.879354  | 2.372204 | 0.419658  |
| C | 4.138166  | 1.842636 | 0.086527  |
| C | 2.383892  | 2.252242 | 1.728369  |
| C | 4.888743  | 1.196446 | 1.057378  |
| H | 4.509035  | 1.947316 | -0.928379 |
| C | 3.140589  | 1.601046 | 2.694225  |
| H | 1.414082  | 2.670894 | 1.983909  |
| C | 4.388586  | 1.074438 | 2.357796  |
| H | 5.862089  | 0.785683 | 0.808762  |
| H | 2.762598  | 1.504724 | 3.706731  |
| H | 4.978560  | 0.566217 | 3.114825  |
| O | 0.713958  | 3.755364 | -3.255672 |
| H | 1.606533  | 3.587798 | -2.615857 |
| H | 0.171393  | 2.879359 | -3.131220 |
| C | -0.937759 | 1.341219 | -4.019730 |
| H | 0.785835  | 0.720954 | -2.907848 |
| H | -1.995745 | 1.531779 | -3.880172 |
| C | 1.001889  | 1.211967 | -5.432299 |
| C | -1.090126 | 1.827491 | -6.564451 |
| C | 1.292919  | 1.688612 | -6.845470 |

|    |           |           |            |
|----|-----------|-----------|------------|
| H  | 1.238642  | 0.147377  | -5.291635  |
| H  | 1.559829  | 1.781410  | -4.678543  |
| C  | -0.004209 | 1.338974  | -7.565863  |
| H  | -1.110003 | 2.920340  | -6.614679  |
| H  | 1.465556  | 2.770789  | -6.854311  |
| H  | 2.165267  | 1.196904  | -7.280967  |
| H  | -0.048370 | 1.784641  | -8.557619  |
| H  | -0.009565 | 0.255553  | -7.690747  |
| N  | -0.442007 | 1.419358  | -5.269207  |
| C  | -1.136095 | -0.821190 | -1.472703  |
| H  | -1.715232 | -1.096808 | -0.584426  |
| H  | -1.629921 | -1.245955 | -2.351746  |
| H  | -0.145992 | -1.284860 | -1.388011  |
| H  | -2.026341 | 1.120255  | -1.688940  |
| C  | -2.546695 | 1.270706  | -6.776441  |
| C  | -3.197478 | 1.644784  | -8.129098  |
| C  | -2.481620 | -0.275486 | -6.690879  |
| O  | -3.423808 | 1.692388  | -5.729940  |
| C  | -4.450779 | 1.077296  | -8.453380  |
| C  | -2.626108 | 2.551431  | -9.052189  |
| C  | -2.173837 | -1.065936 | -7.824951  |
| C  | -2.762451 | -0.950448 | -5.478885  |
| Si | -3.808325 | 3.395587  | -5.508211  |
| C  | -5.075065 | 1.357246  | -9.671292  |
| H  | -4.941651 | 0.404417  | -7.761170  |
| C  | -3.258399 | 2.830140  | -10.267200 |
| H  | -1.733249 | 3.109372  | -8.825328  |
| C  | -2.122841 | -2.459677 | -7.739177  |
| H  | -1.965337 | -0.604439 | -8.781788  |
| C  | -2.703784 | -2.343885 | -5.399779  |
| H  | -3.035820 | -0.411487 | -4.583851  |
| C  | -4.185024 | 4.407053  | -7.036634  |
| C  | -5.385196 | 3.409653  | -4.509485  |
| C  | -2.551619 | 4.320388  | -4.468101  |
| C  | -4.475345 | 2.226637  | -10.581100 |
| H  | -6.027288 | 0.900629  | -9.908051  |
| H  | -2.811409 | 3.532705  | -10.958887 |
| C  | -2.383031 | -3.097662 | -6.527255  |
| H  | -1.881127 | -3.046172 | -8.616052  |
| H  | -2.913846 | -2.840051 | -4.460737  |
| H  | -3.245382 | 4.669081  | -7.560337  |
| H  | -4.876203 | 3.855275  | -7.705058  |
| H  | -4.679265 | 5.350309  | -6.725491  |
| H  | -5.215381 | 2.884160  | -3.547258  |
| H  | -5.692569 | 4.456772  | -4.309986  |
| H  | -6.184702 | 2.890278  | -5.076840  |
| H  | -1.577960 | 4.395516  | -4.988506  |
| H  | -2.930648 | 5.347147  | -4.285309  |
| H  | -2.419529 | 3.816914  | -3.489220  |
| H  | -4.962198 | 2.446962  | -11.522234 |
| H  | -2.342234 | -4.177279 | -6.462871  |

## E. X-ray Crystallographic Data

### Single Crystal X-ray Diffraction Data for Compound 6

X-ray structure determinations: Crystals of compound **6** were obtained by slow diffusion of hexane into a saturated diethyl ether solution. Measurements were made on a Rigaku XtaLab P200 diffractometer equipped with a Pilatus 200K area detector, a Microfocus-HF007 rotating anode with  $\text{MoK}\alpha$  radiation, Confocal Max Flux optic and a Cryostream Plus low temperature device ( $T = 100\text{K}$ ).

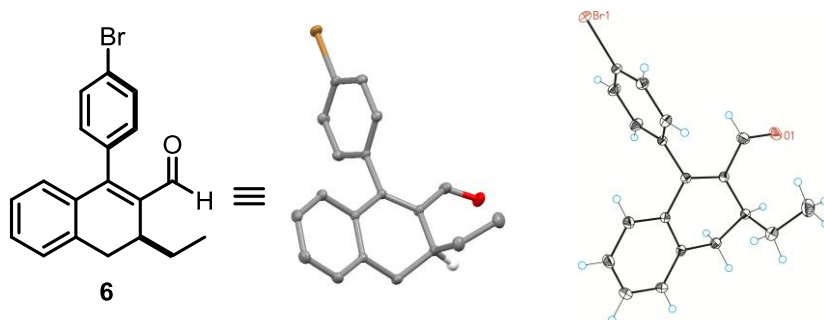

**Table S2.** Crystal data and structure refinement for **6** at 100 K: **CCDC 1417311**

|                                   |                                             |                     |
|-----------------------------------|---------------------------------------------|---------------------|
| Identification code               | LD412                                       |                     |
| Empirical formula                 | C <sub>19</sub> H <sub>17</sub> Br O        |                     |
| Formula weight                    | 341.23                                      |                     |
| Temperature                       | 100(2) K                                    |                     |
| Wavelength                        | 0.71073 Å                                   |                     |
| Crystal system                    | Orthorhombic                                |                     |
| Space group                       | P2(1)2(1)2(1)                               |                     |
| Unit cell dimensions              | a = 8.979(3) Å                              | $\alpha = 90^\circ$ |
|                                   | b = 9.238(3) Å                              | $\beta = 90^\circ$  |
|                                   | c = 18.493(7) Å                             | $\gamma = 90^\circ$ |
| Volume                            | 1534.0(10) Å <sup>3</sup>                   |                     |
| Z                                 | 4                                           |                     |
| Density (calculated)              | 1.478 Mg/m <sup>3</sup>                     |                     |
| Absorption coefficient            | 2.680 mm <sup>-1</sup>                      |                     |
| F(000)                            | 696                                         |                     |
| Crystal size                      | 0.20 x 0.20 x 0.20 mm <sup>3</sup>          |                     |
| Theta range for data collection   | 2.464 to 36.340°                            |                     |
| Index ranges                      | -14 ≤ h ≤ 14, -15 ≤ k ≤ 14, -29 ≤ l ≤ 28    |                     |
| Reflections collected             | 14288                                       |                     |
| Independent reflections           | 7112 [R(int) = 0.0402]                      |                     |
| Completeness to theta = 36.340°   | 98.4%                                       |                     |
| Absorption correction             | Empirical                                   |                     |
| Max. and min. transmission        | 0.616 and 0.474                             |                     |
| Refinement method                 | Full-matrix least-squares on F <sup>2</sup> |                     |
| Data / restraints / parameters    | 7112 / 0 / 192                              |                     |
| Goodness-of-fit on F <sup>2</sup> | 0.832                                       |                     |
| Final R indices [I > 2σ(I)]       | R1 = 0.0299, wR2 = 0.0542                   |                     |
| R indices (all data)              | R1 = 0.0476, wR2 = 0.0566                   |                     |
| Flack parameter                   | x = 0.059(7)                                |                     |
| Largest diff. peak and hole       | 0.846 and -0.458 e.Å <sup>-3</sup>          |                     |

## F. References

1. T. Miura, T. Tanaka, K. Hiraga, S. G. Stewart, M. Murakami, *J. Am. Chem. Soc.* **2013**, *135*, 13652–13655.
2. T. J. Connolly, T. A. Durst, *Tetrahedron* **1997**, *47*, 15969–15982.
3. G. Porter, M. Tchir, *J. Chem. Soc. A*, **1971**, 3772–3777.
4. K. Uji-Ie, K. Kikuchi, H. Kokubun, *Chem. Lett.* **1977**, 499–502.
5. K. Uji-Ie, K. Kikuchi, H. Kokubun, *J. Photochem.* **1979**, *10*, 145–157.
6. G. W. T. M. J. Frisch, H. B. Schlegel, G. E. Scuseria, M. A. Robb, J. R. Cheeseman, G. Scalmani, V. Barone, B. Mennucci, G. A. Petersson, H. Nakatsuji, M. Caricato, X. Li, H. P. Hratchian, A. F. Izmaylov, J. Bloino, G. Zheng, J. L. Sonnenberg, M. Hada, M. Ehara, K. Toyota, R. Fukuda, J. Hasegawa, M. Ishida, T. Nakajima, Y. Honda, O. Kitao, H. Nakai, T. Vreven, J. A. Montgomery, J. E. Peralta, F. Ogliaro, M. Bearpark, J. J. Heyd, E. Brothers, K. N. Kudin, V. N. Staroverov, R. Kobayashi, J. Normand, K. Raghavachari, A. Rendell, J. C. Burant, S. S. Iyengar, J. Tomasi, M. Cossi, N. Rega, J. M. Millam, M. Klene, J. E. Knox, J. B. Cross, V. Bakken, C. Adamo, J. Jaramillo, R. Gomperts, R. E. Stratmann, O. Yazyev, A. J. Austin, R. Cammi, C. Pomelli, J. W. Ochterski, R. L. Martin, K. Morokuma, V. G. Zakrzewski, G. A. Voth, P. Salvador, J. J. Dannenberg, S. Dapprich, A. D. Daniels, Farkas, J. B. Foresman, J. V. Ortiz, J. Cioslowski, and D. J. Fox, (Ed.: W. CT), **2009**.
7. Y. Zhao, D. G. Truhlar, *Theoretical Chemistry Accounts* **2007**, *120*, 215–241.
8. (a) P. C. Hariharan, J. A. Pople, *Theoretica Chimica Acta* **1973**, *28*, 213–222. (b) P. M. W. Gill, B. G. Johnson, J. A. Pople, M. J. Frisch, *Chem. Phys. Lett.*, **1992**, *197*, 490–505.
9. A. V. Marenich, C. J. Cramer, D. G. Truhlar, *Journal of Physical Chemistry B* **2009**, *113*, 6378–6396.
10. S. Dapprich, I. Komáromi, K. S. Byun, K. Morokuma, M. J. Frisch, *J. Mol. Struct.: THEOCHEM*, **1999**, 461–462, 1-21.
11. A. K. Rappe, C. J. Casewit, K. S. Colwell, W. A. Goddard, W. M. Skiff, *J. Amer. Chem. Soc.*, **1992**, *114*, 10024–10035.
12. (a) W. J. Hehre, R. Ditchfield, J. A. Pople, *J. Chem. Phys.* **1972**, *56*, 2257–2261. (b) T. Clark, J. Chandrasekhar, G. W. Spitznagel, P. V. R. Schleyer, *J. Comput. Chem.*, **1983**, *4*, 294–301.
13. (a) K. Fukui, *Acc. Chem. Res.*, **1981**, *14*, 363-368. (b) H. P. Hratchian, H. B. Schlegel, *J. Chem. Phys.* **2004**, *120*, 9918–9124.

## G. NMR Spectra

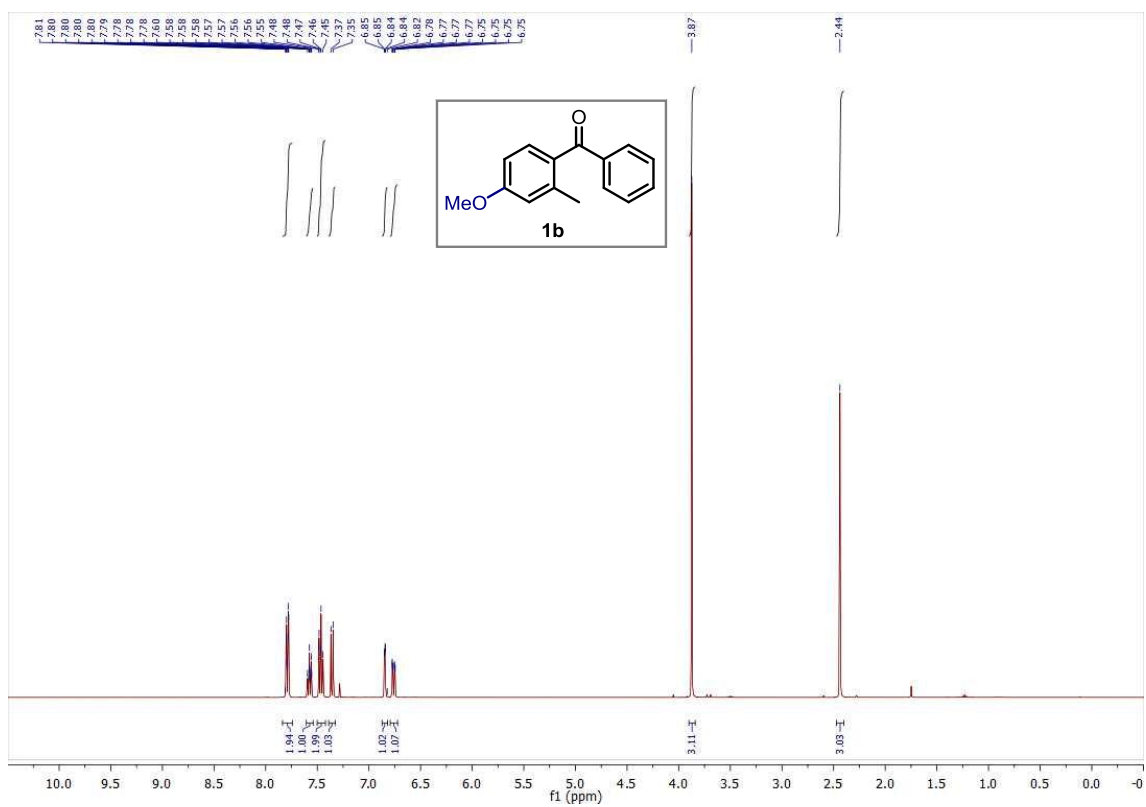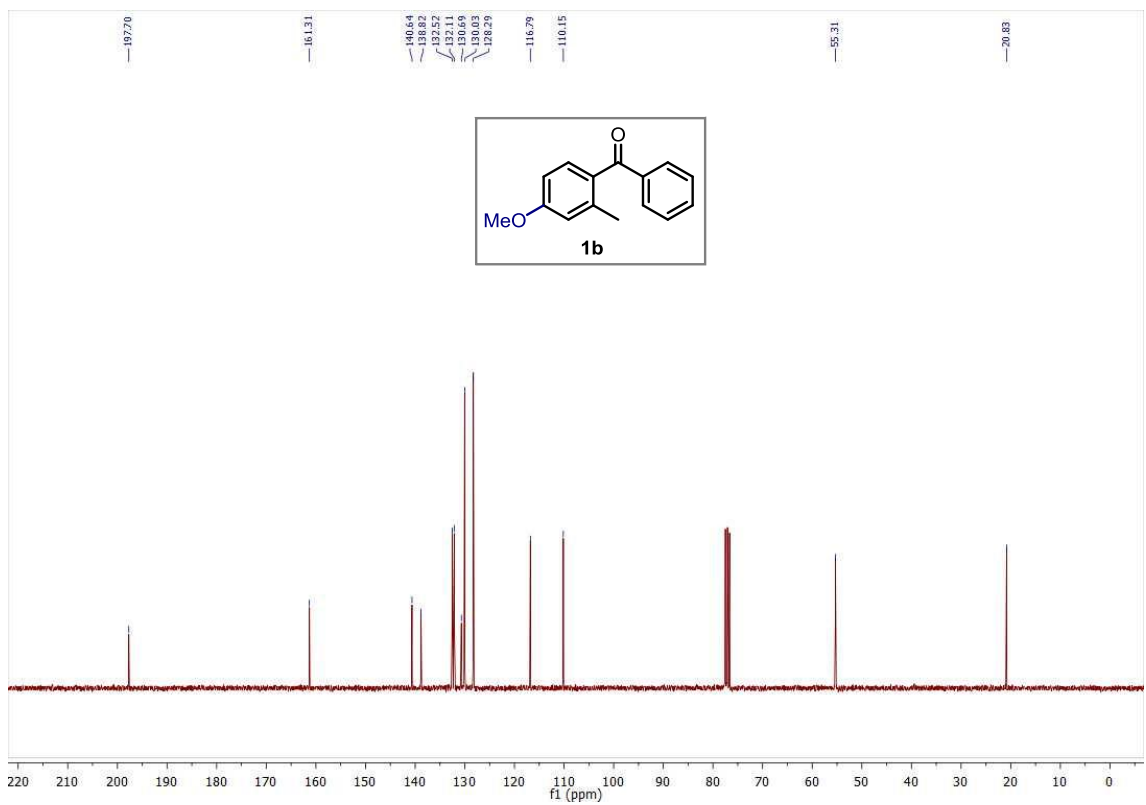



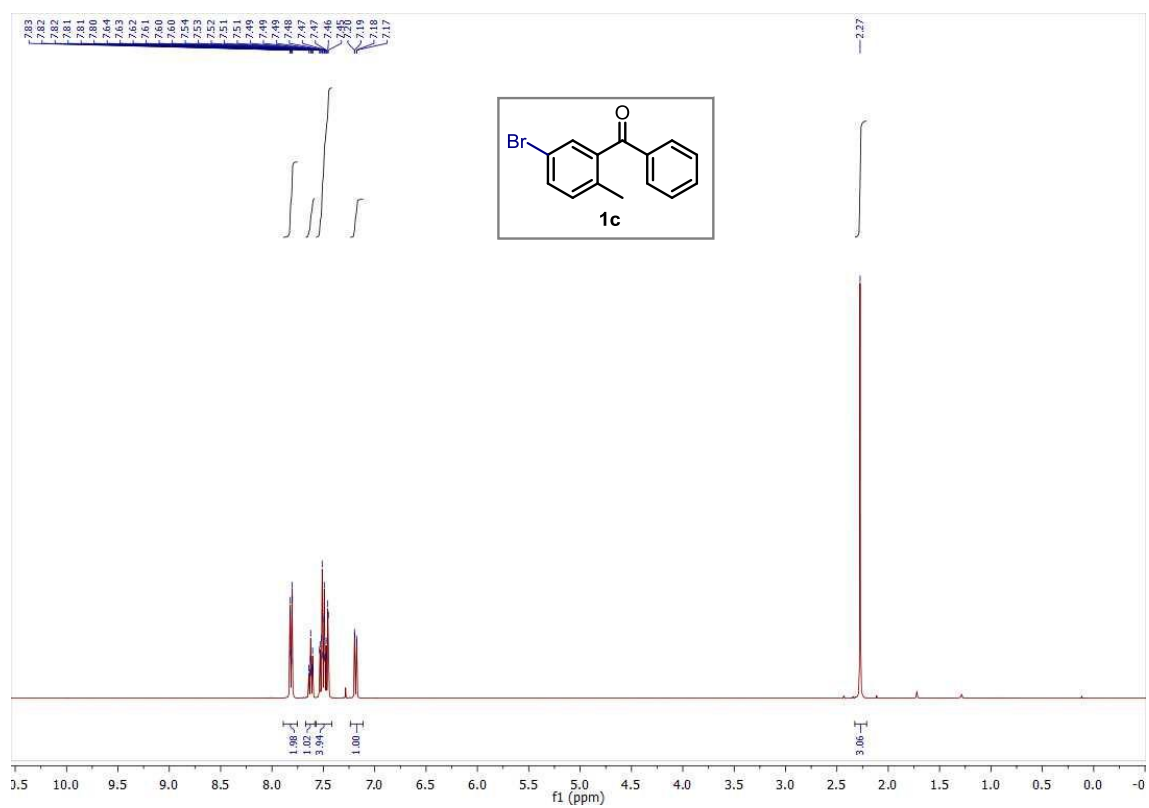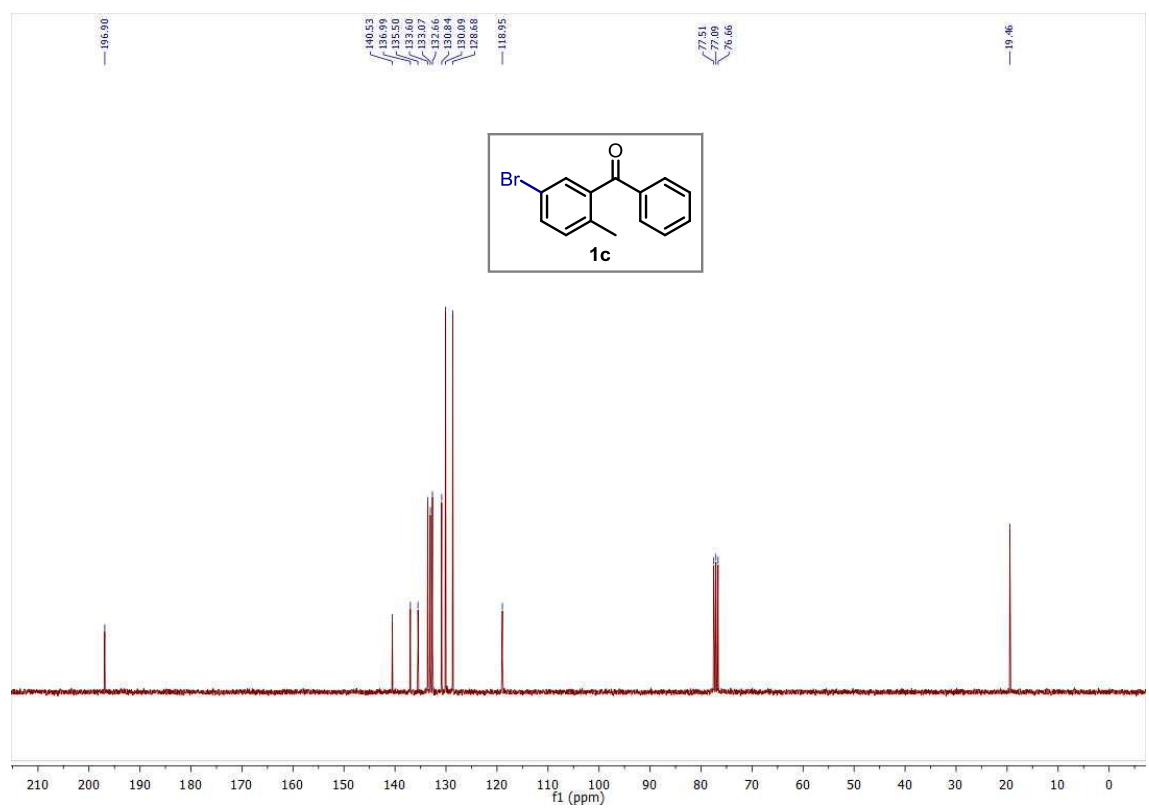

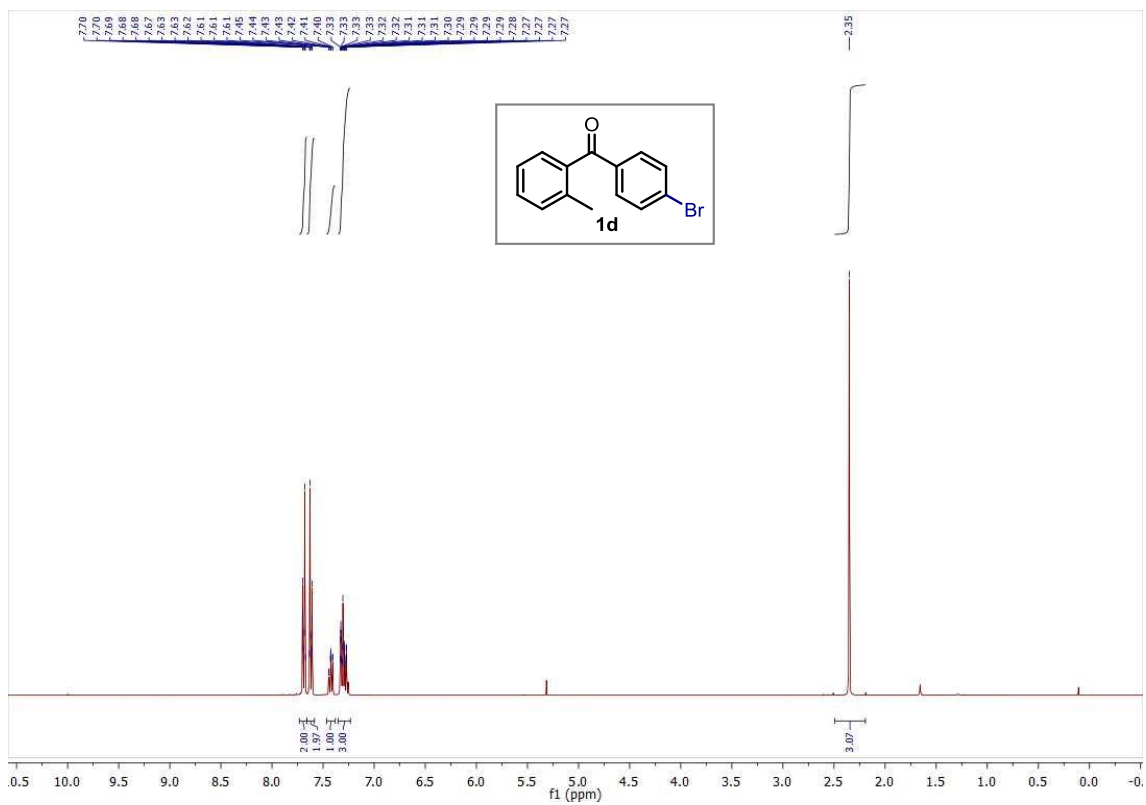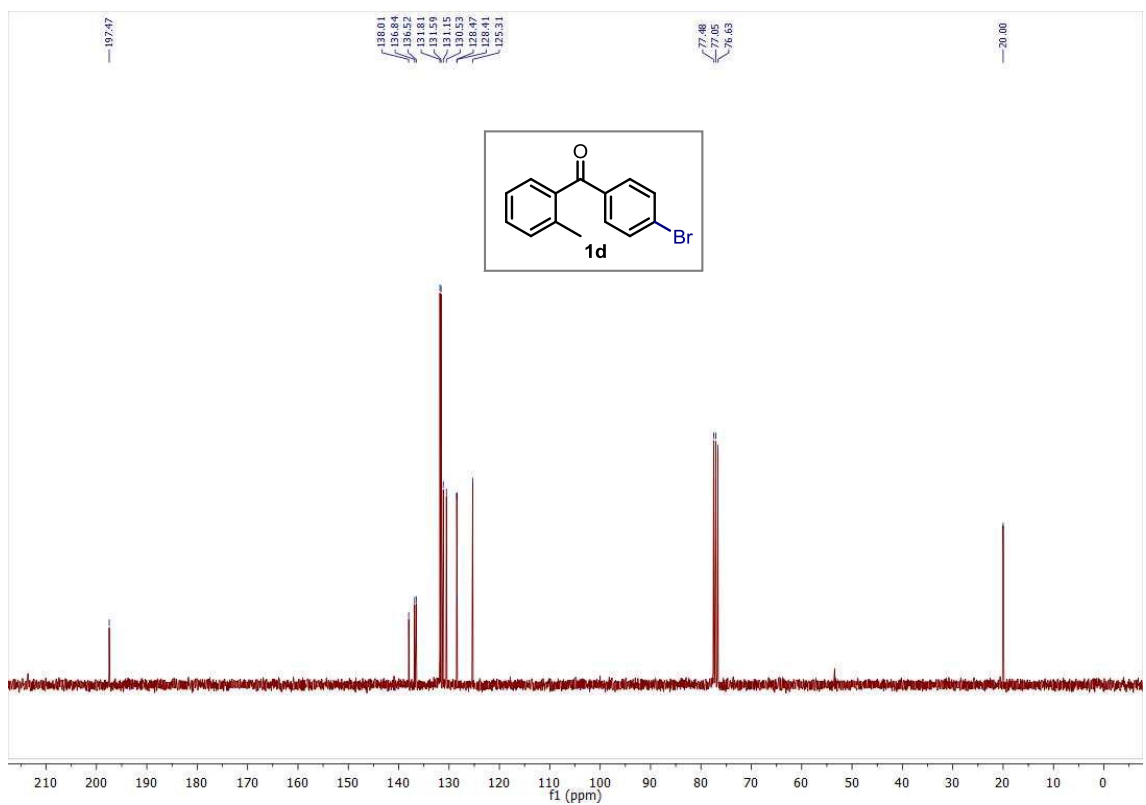



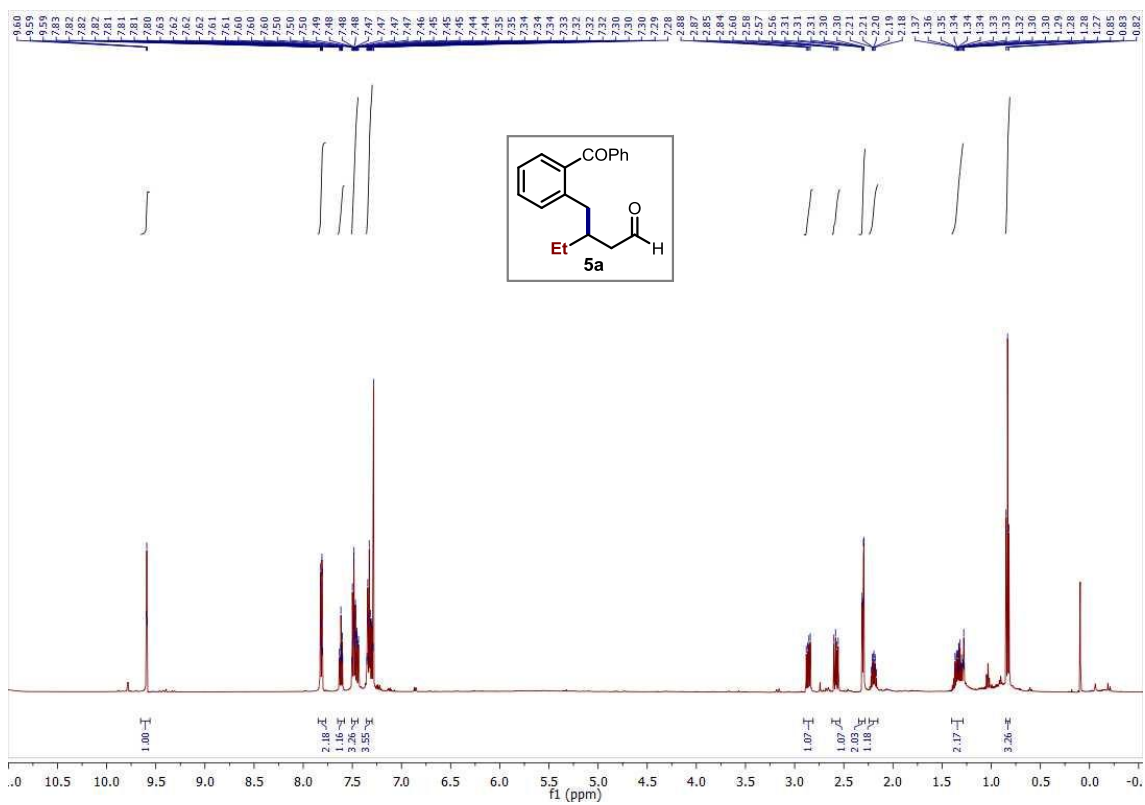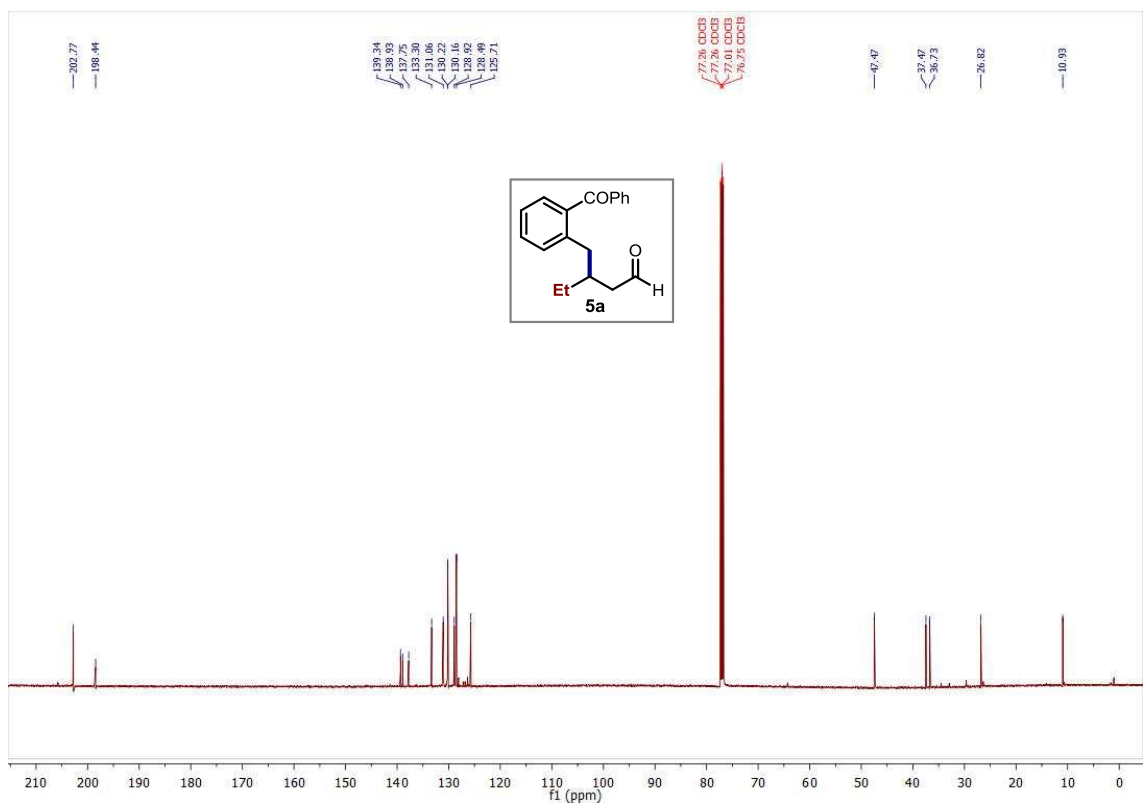

### $H^1-H^1$ COSY analysis of compound **5a**

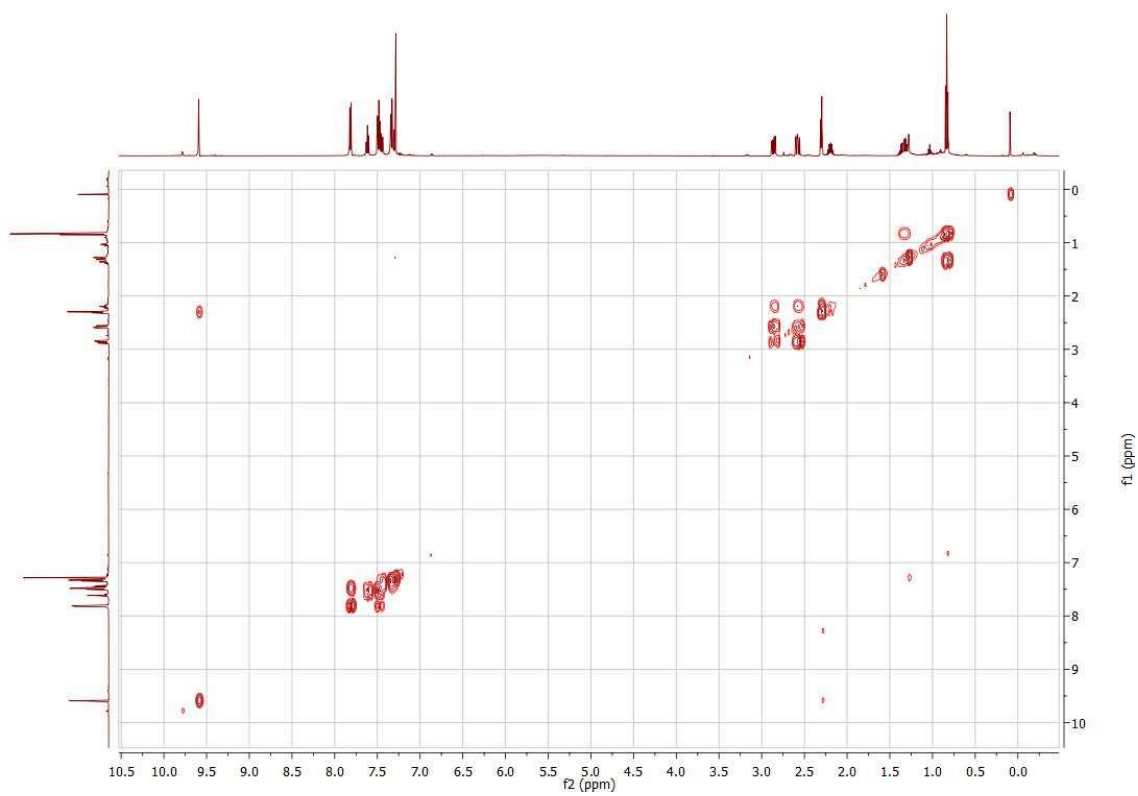

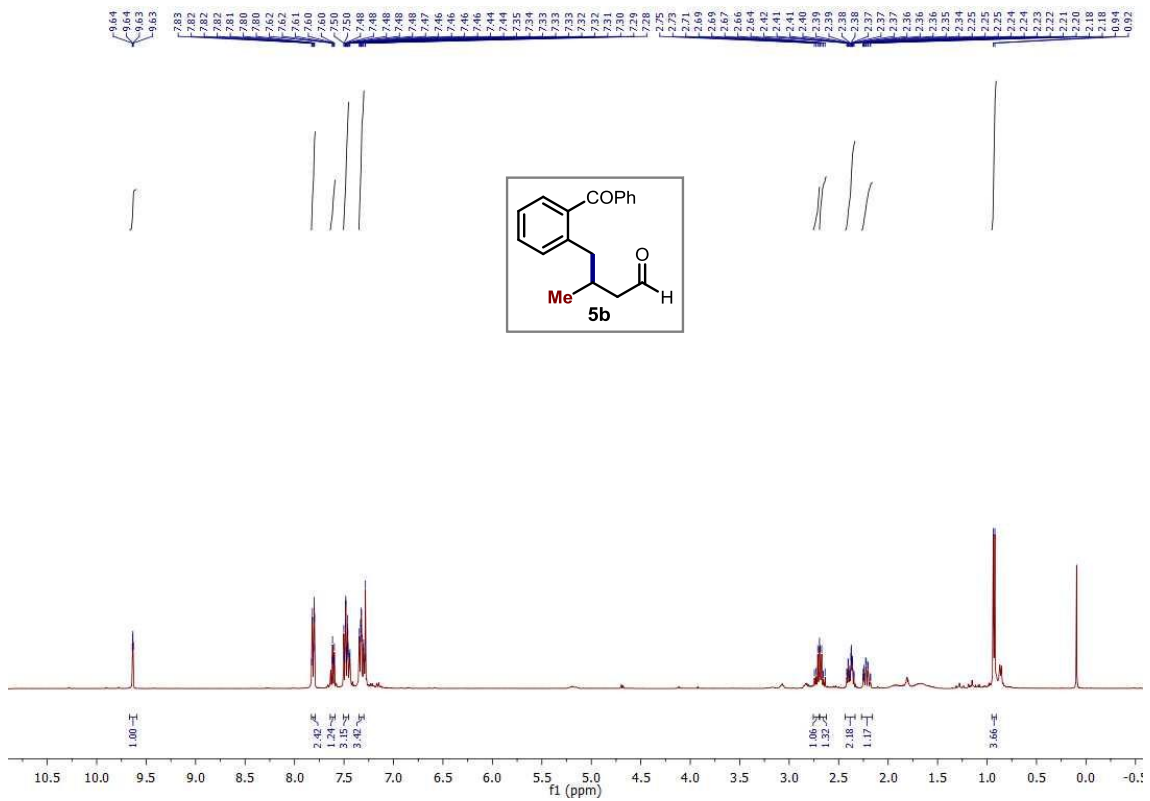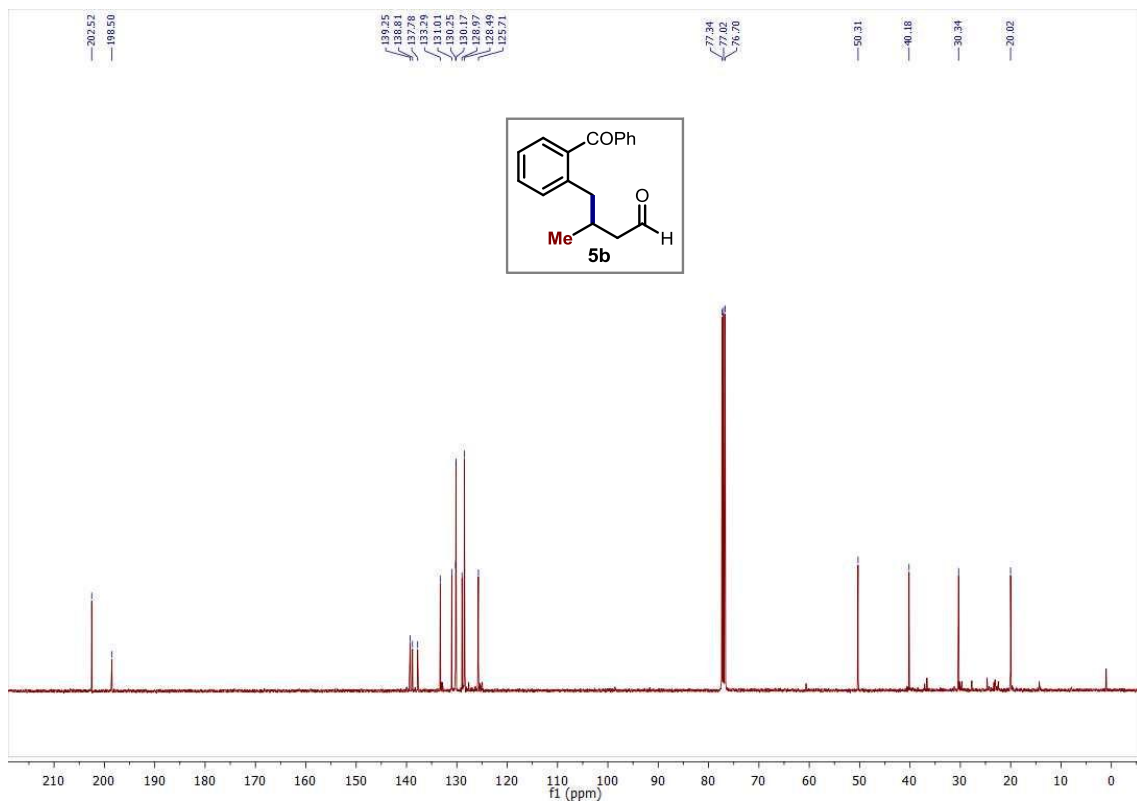

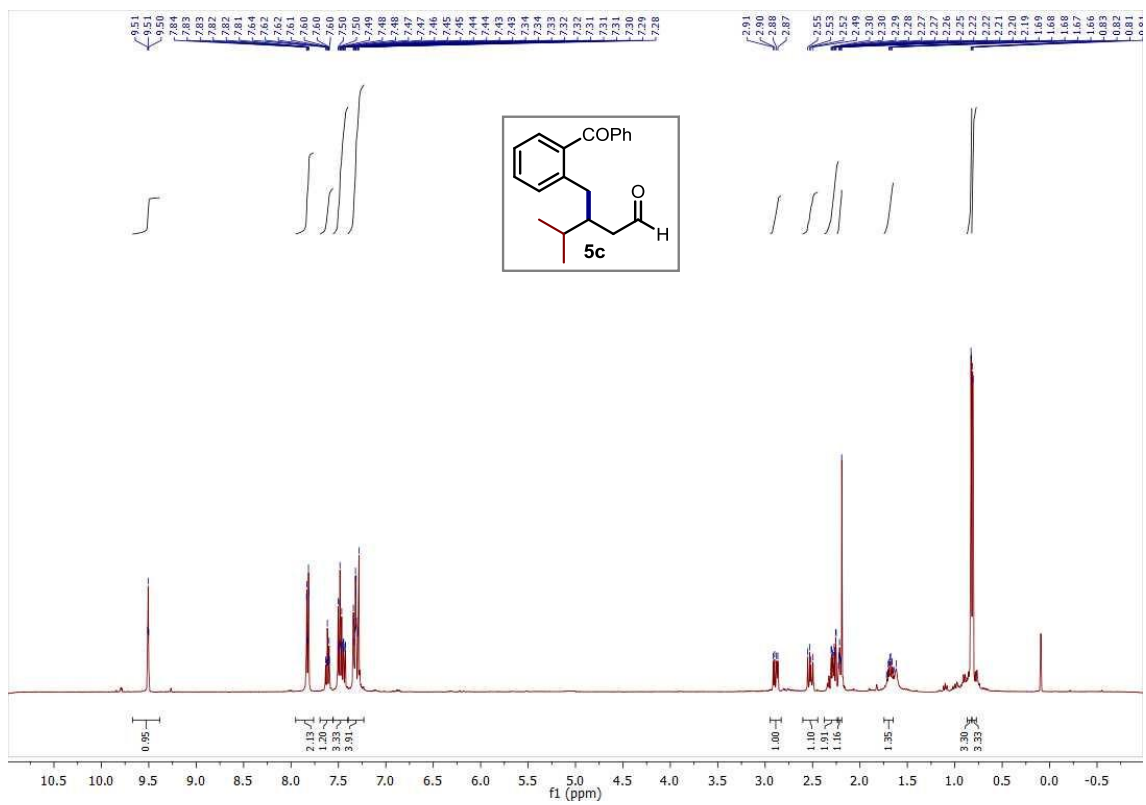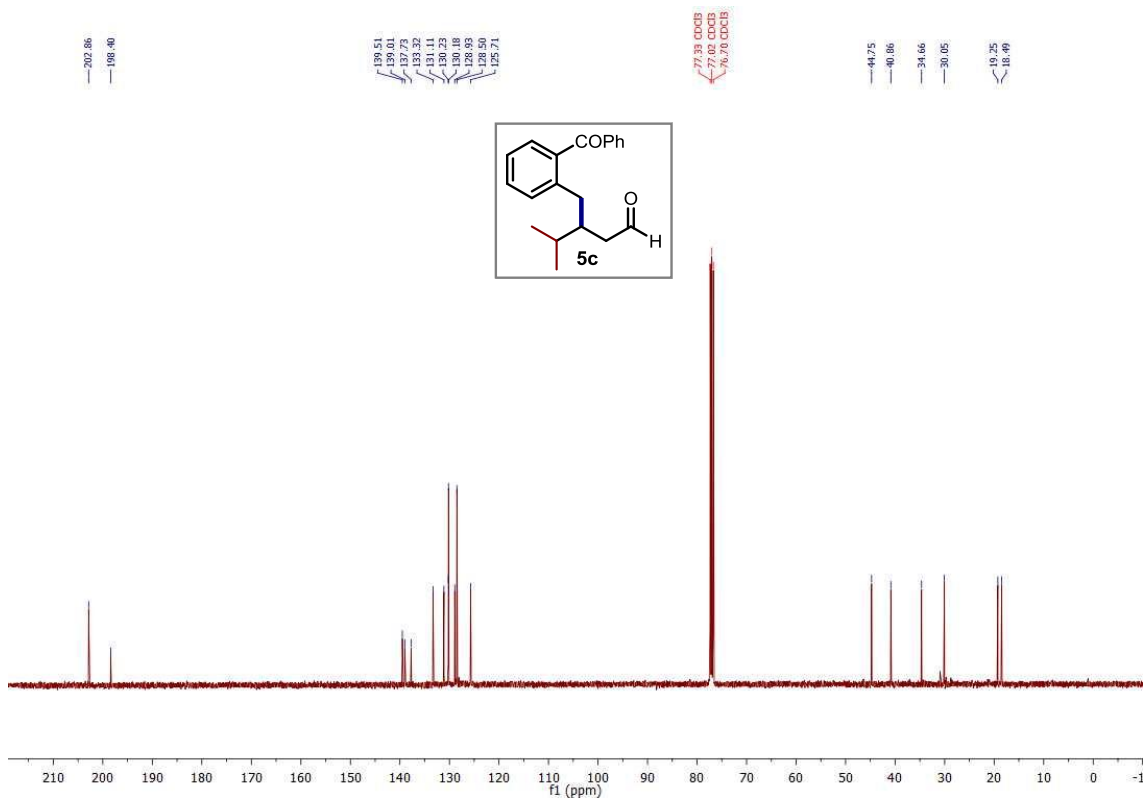

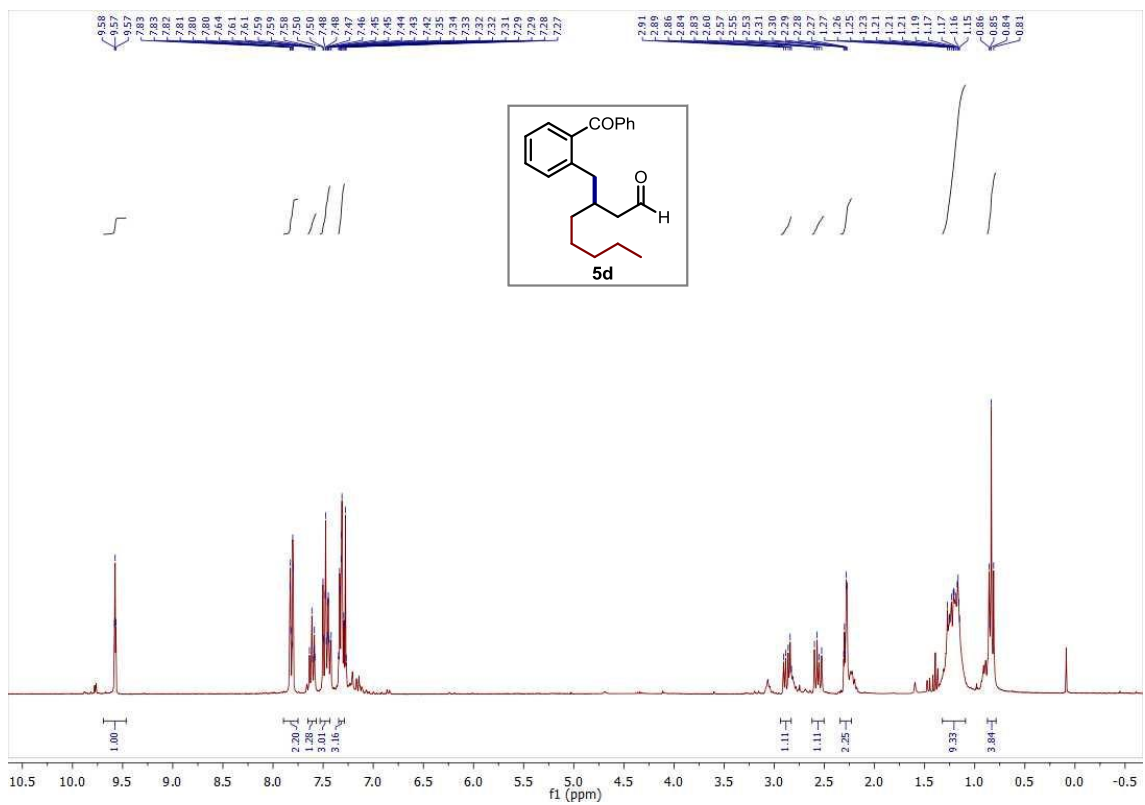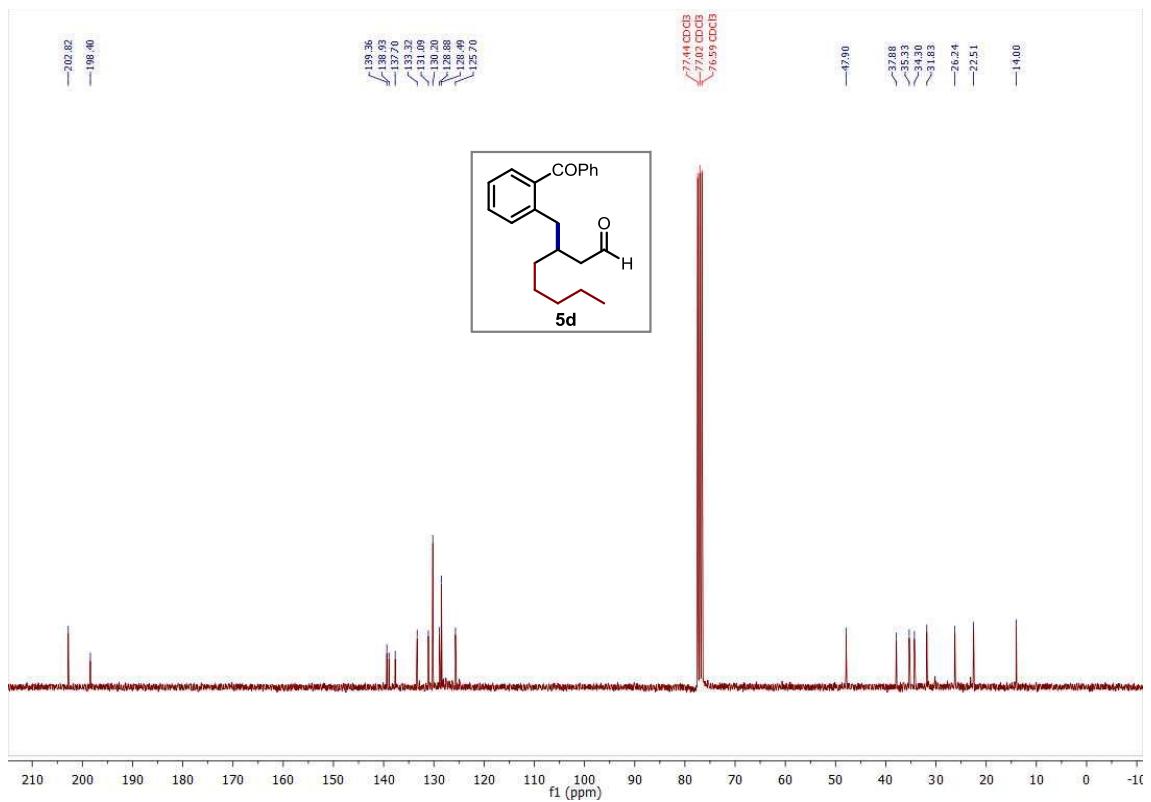



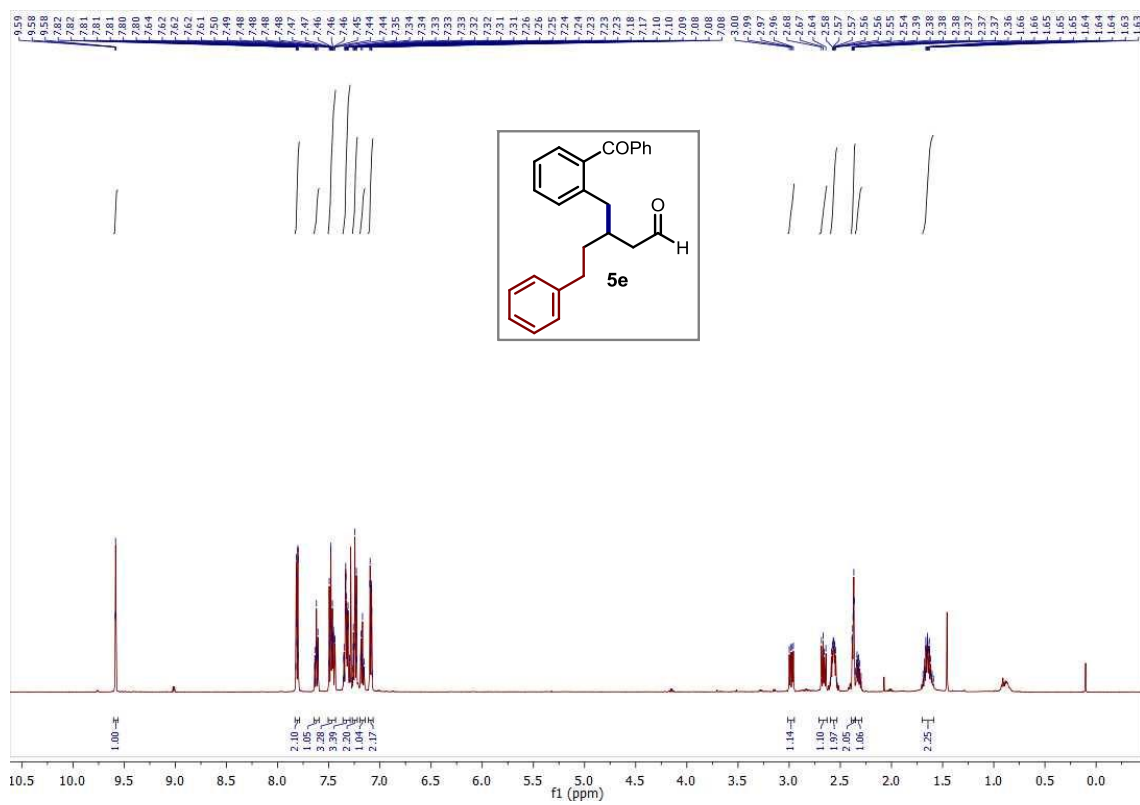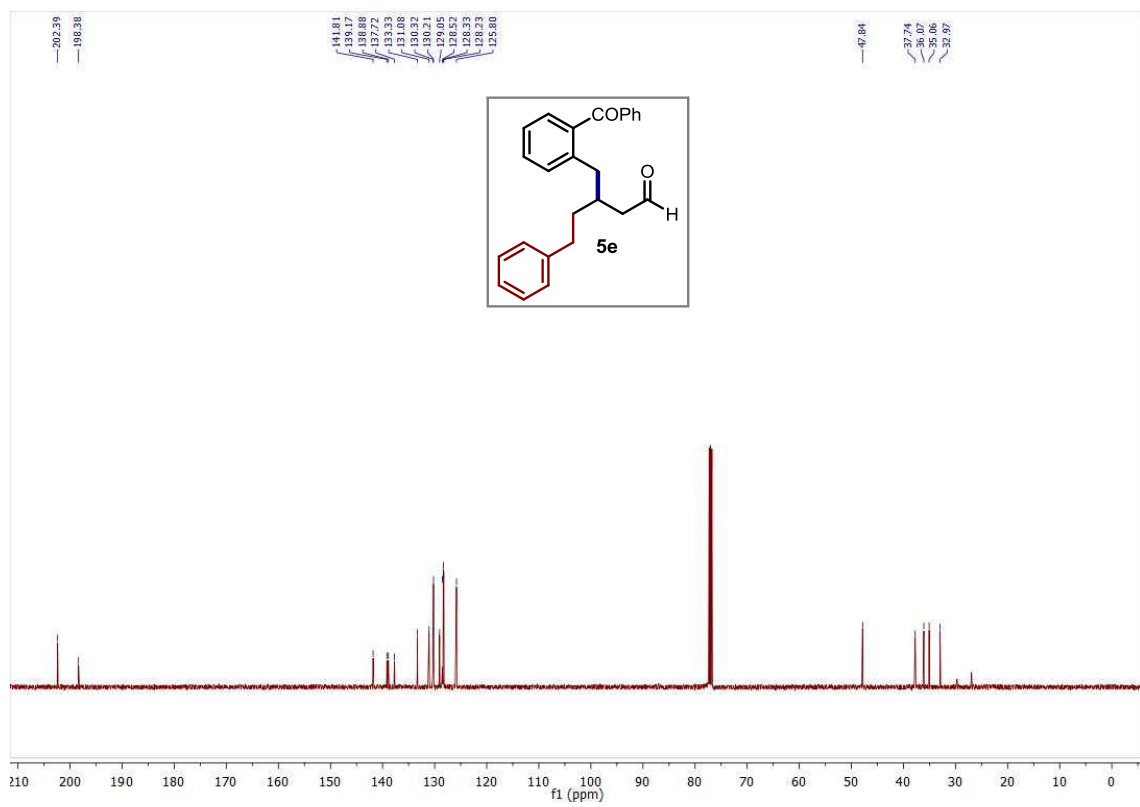



$^1\text{H}$ - $^1\text{H}$  COSY analysis of compound **5f**

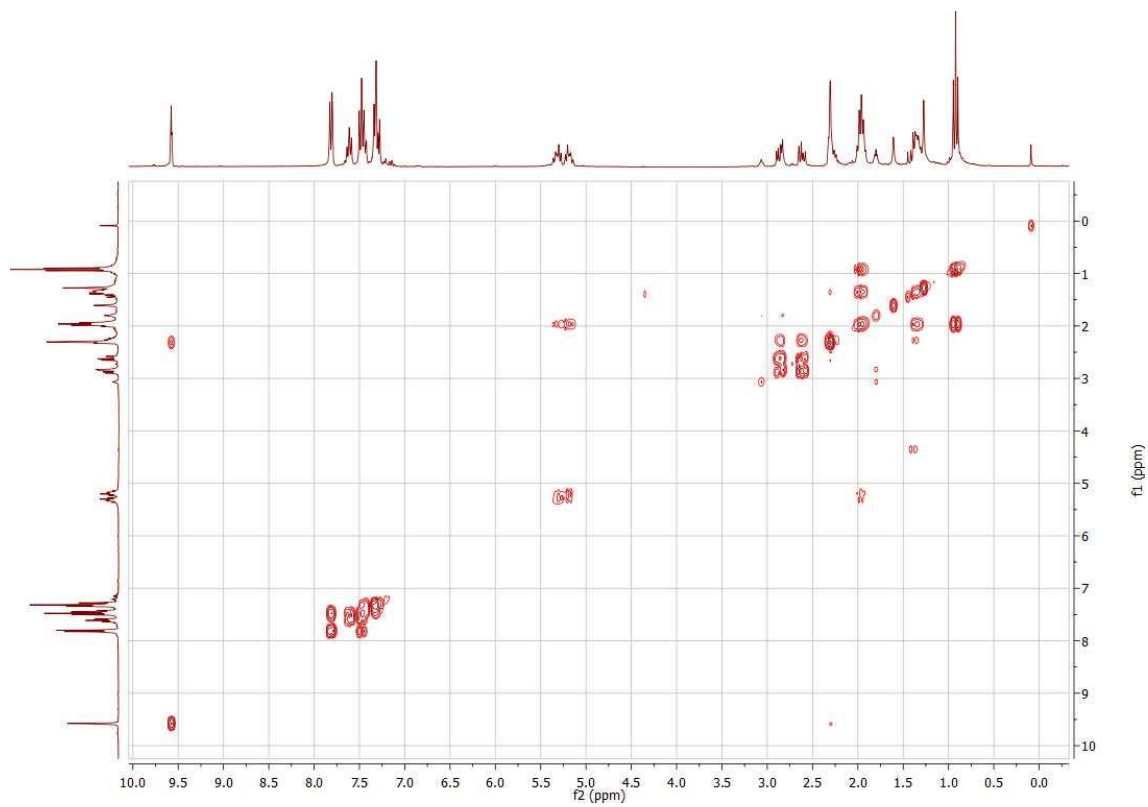

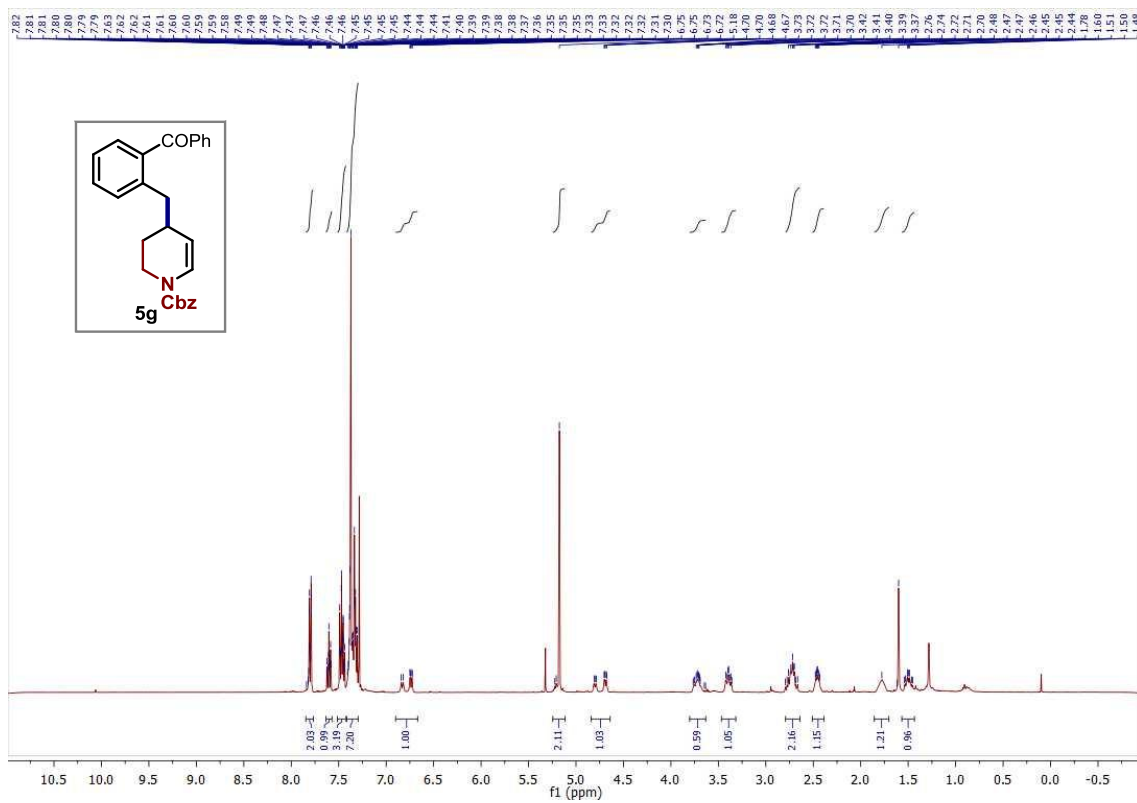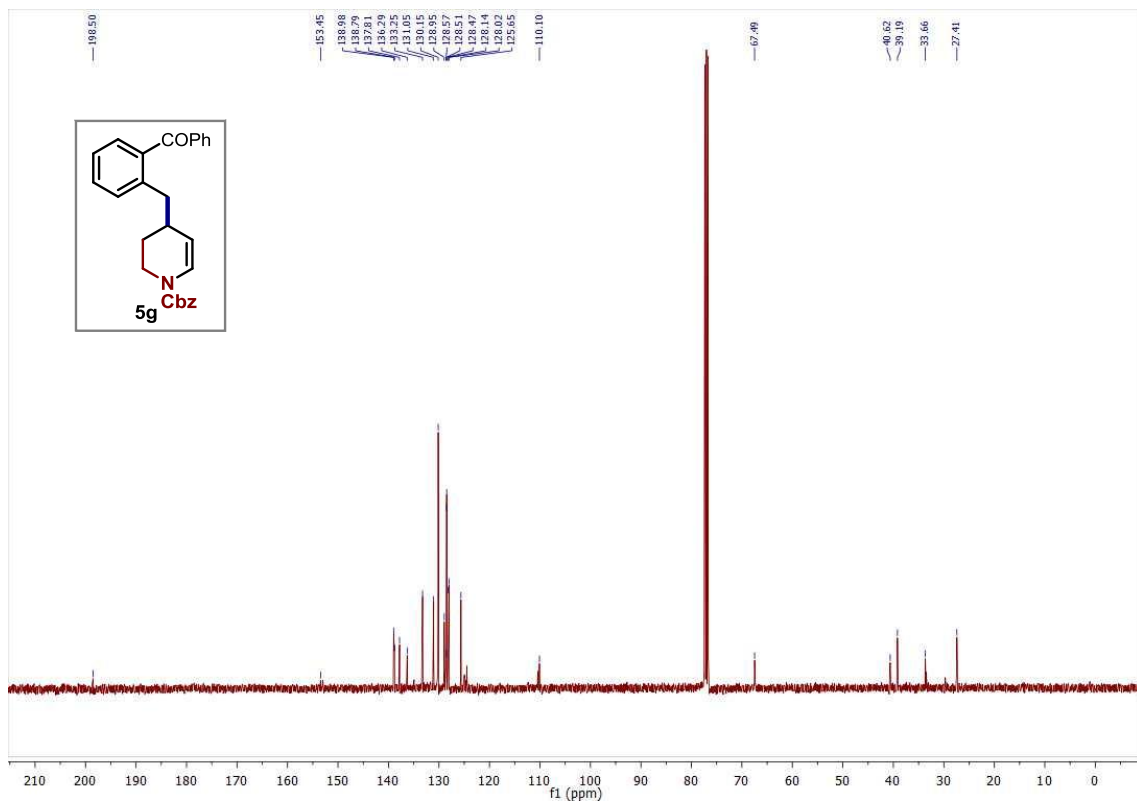

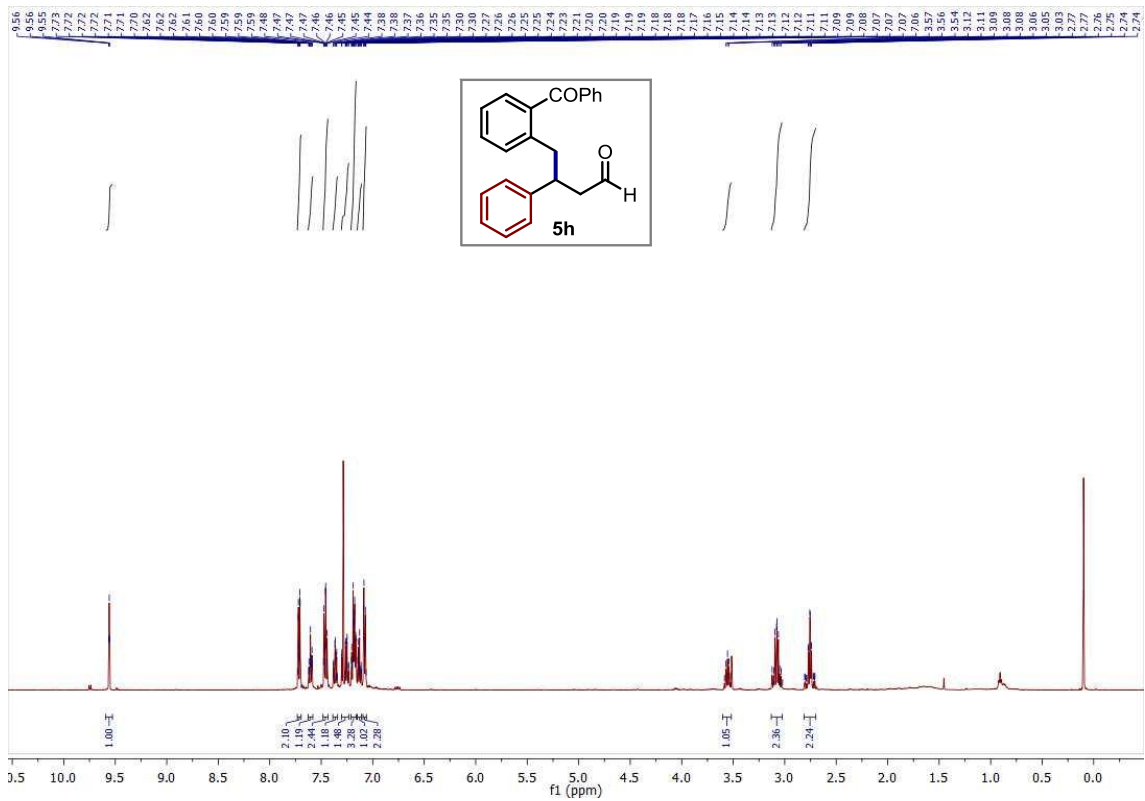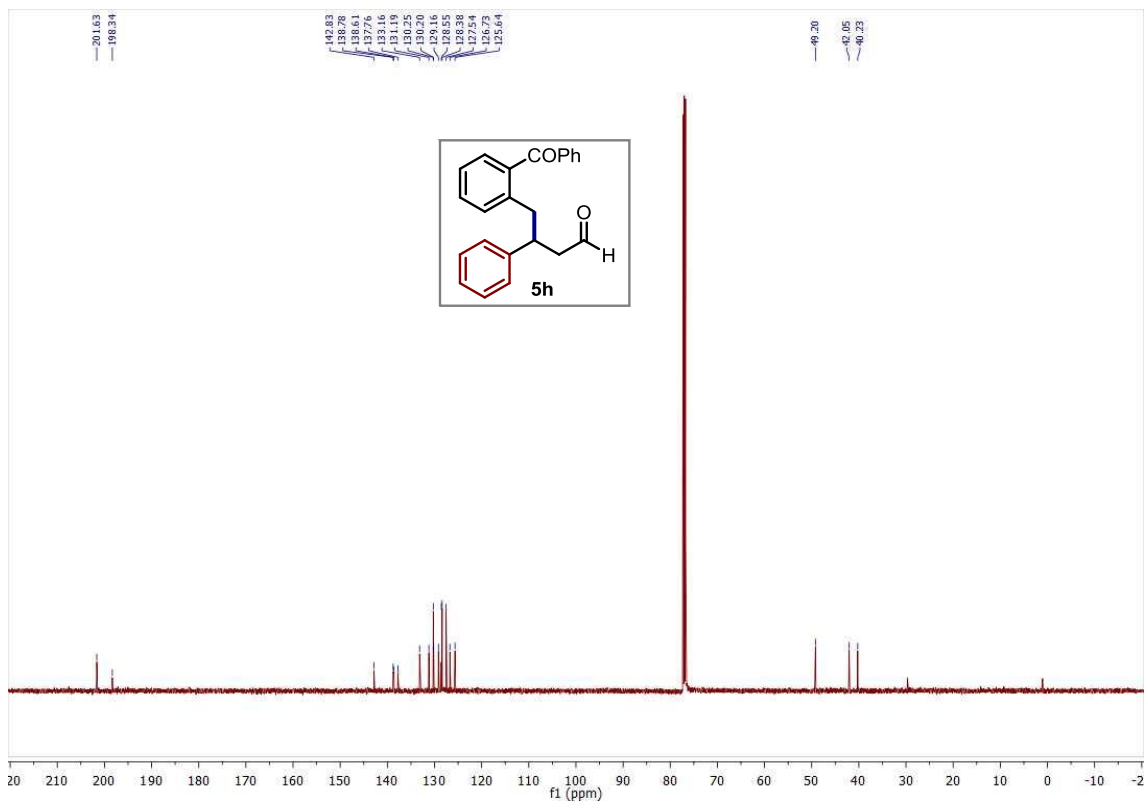

$^1\text{H}$ - $^1\text{H}$  COSY analysis of compound **5h**

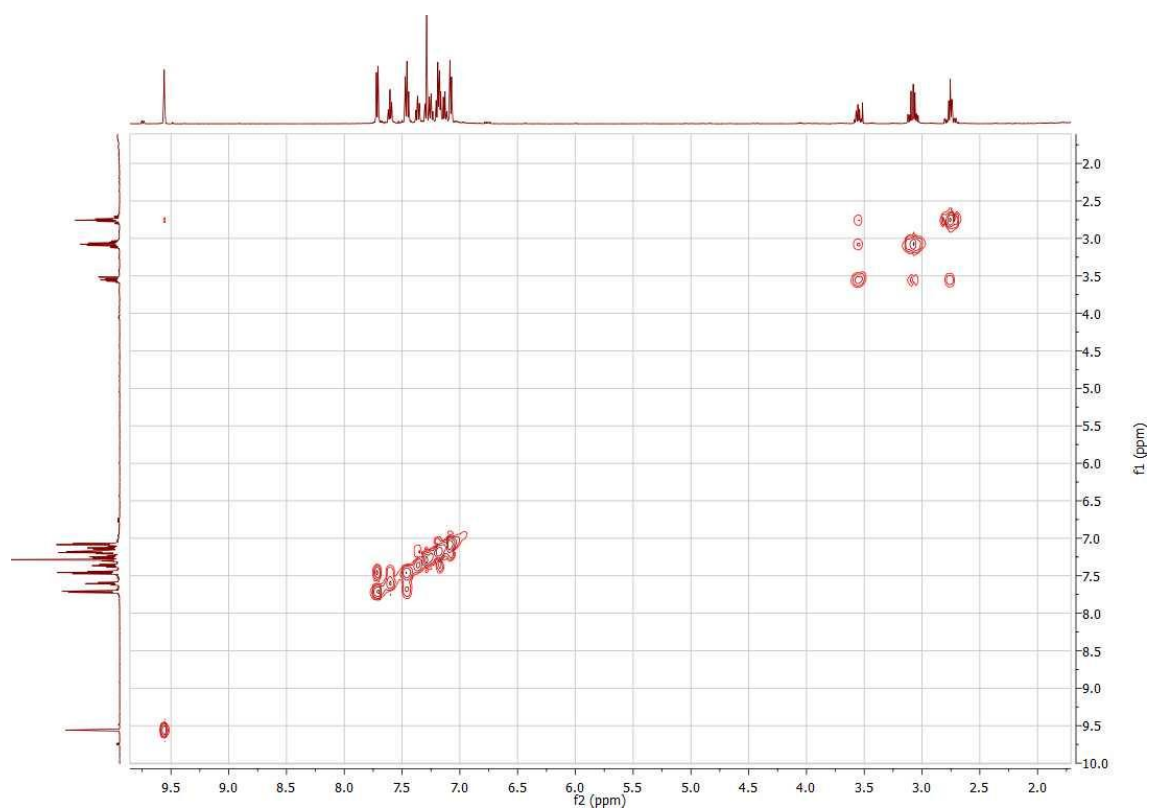

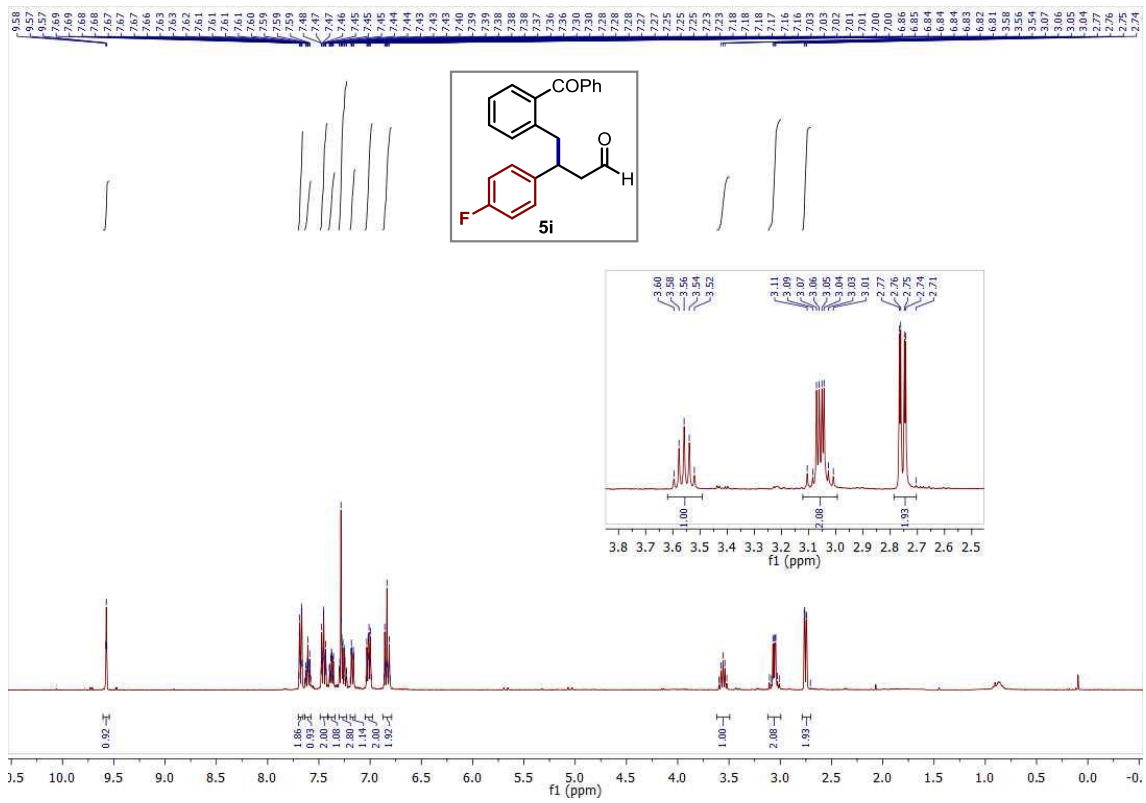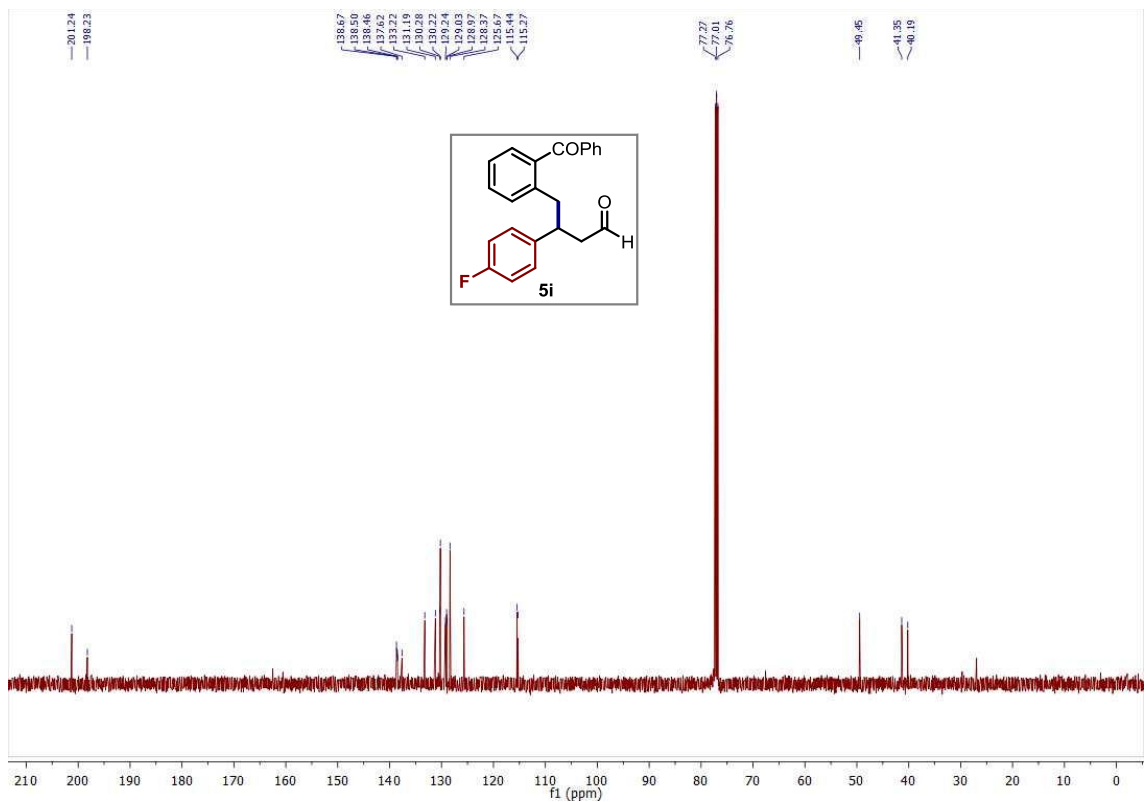

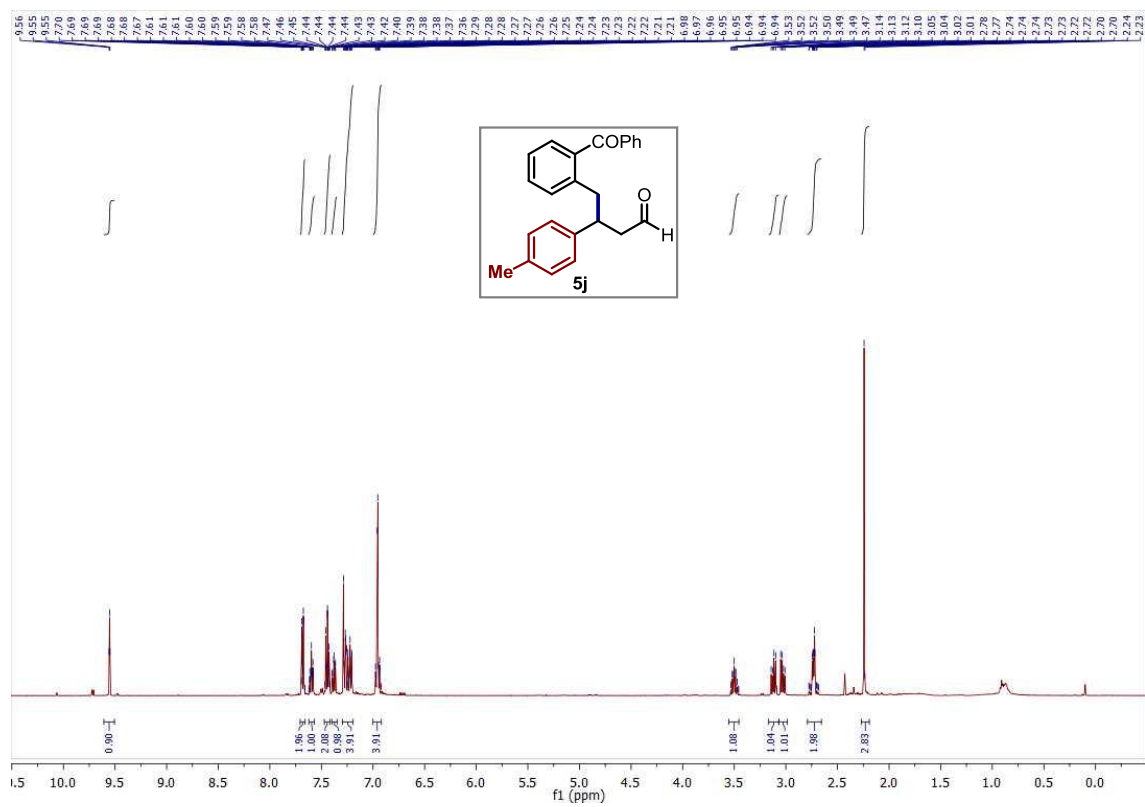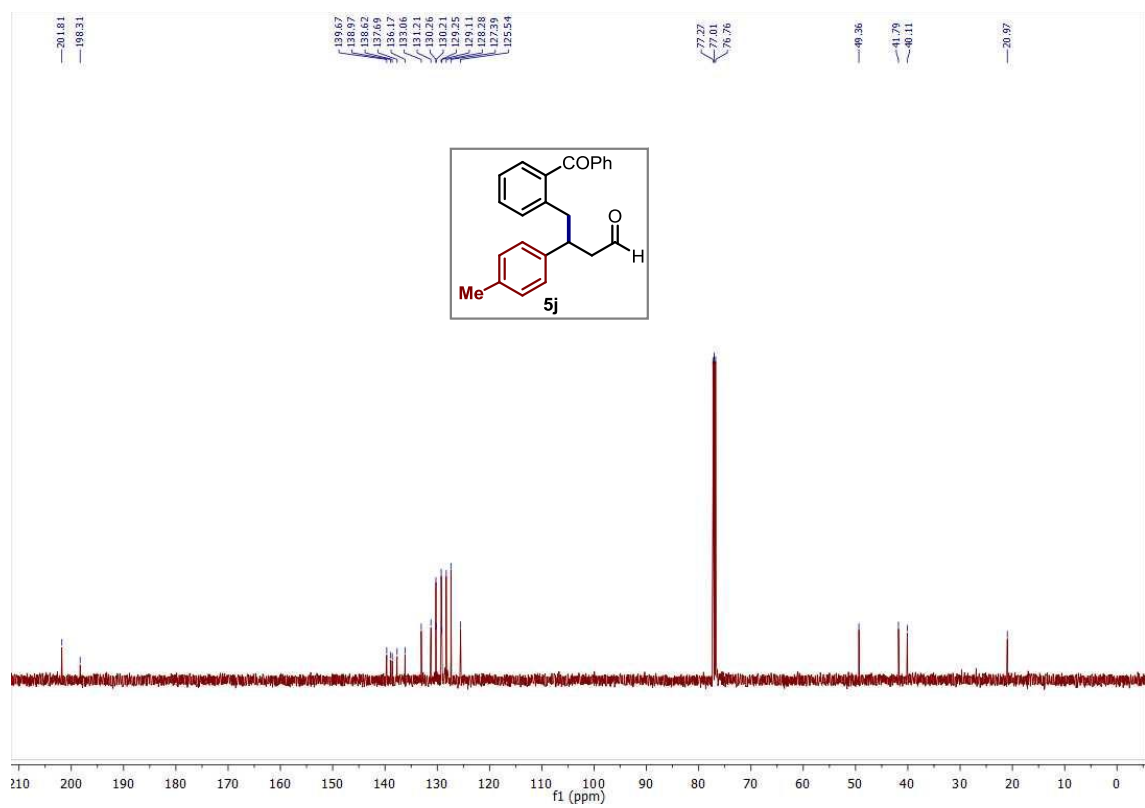







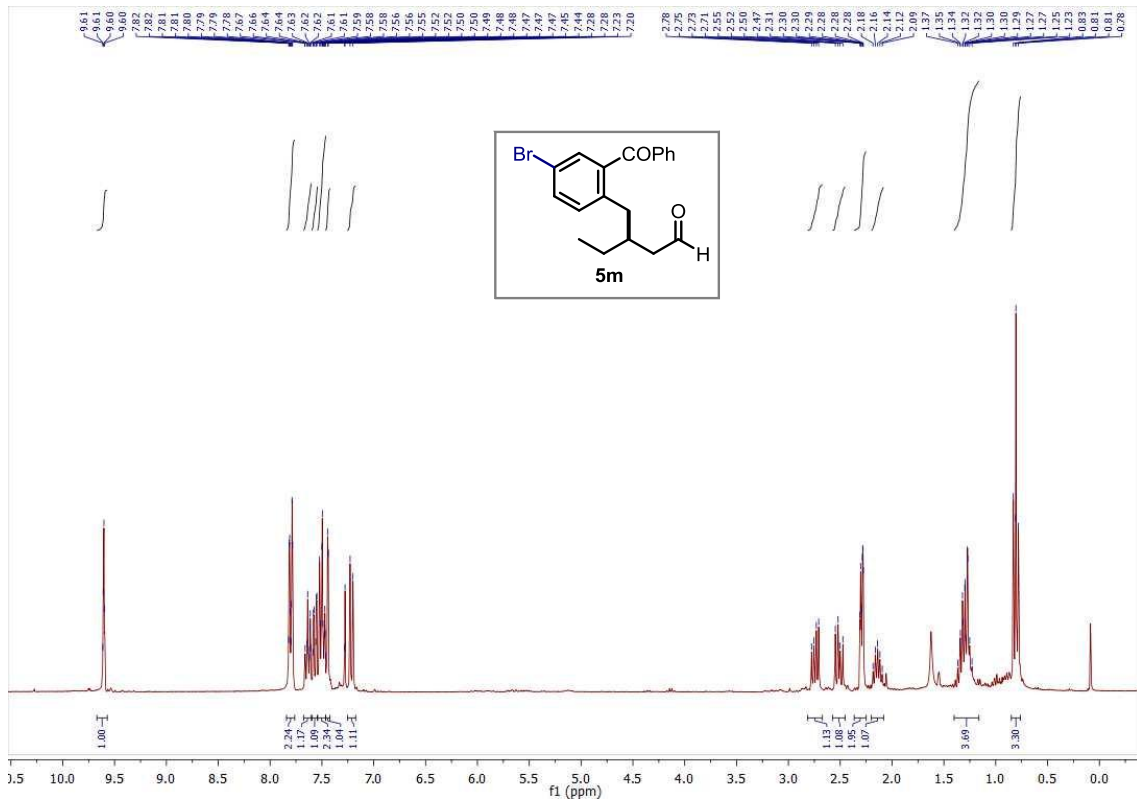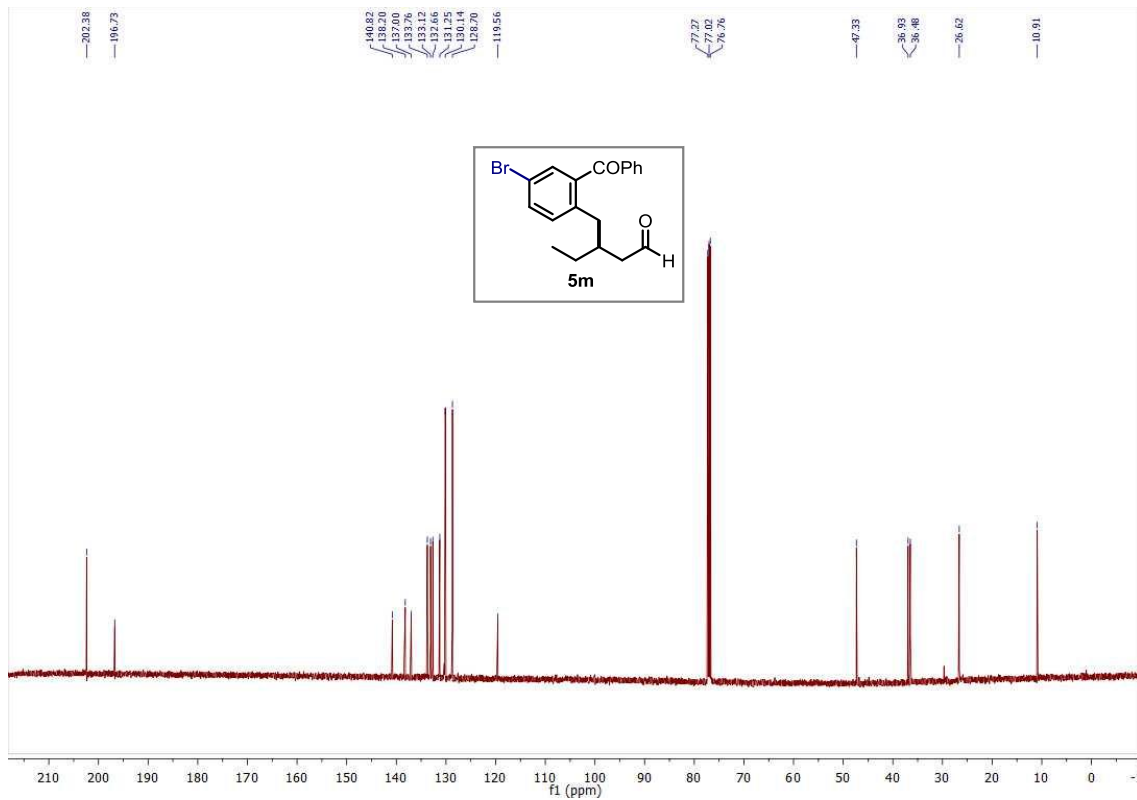

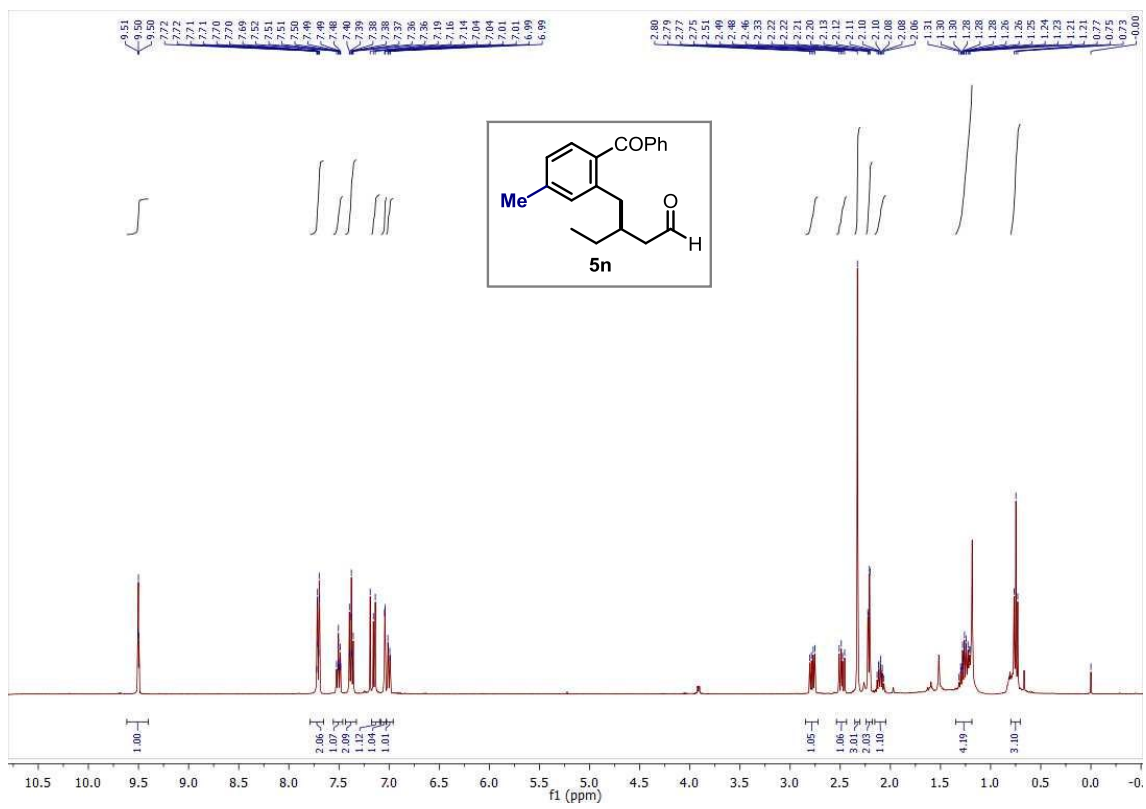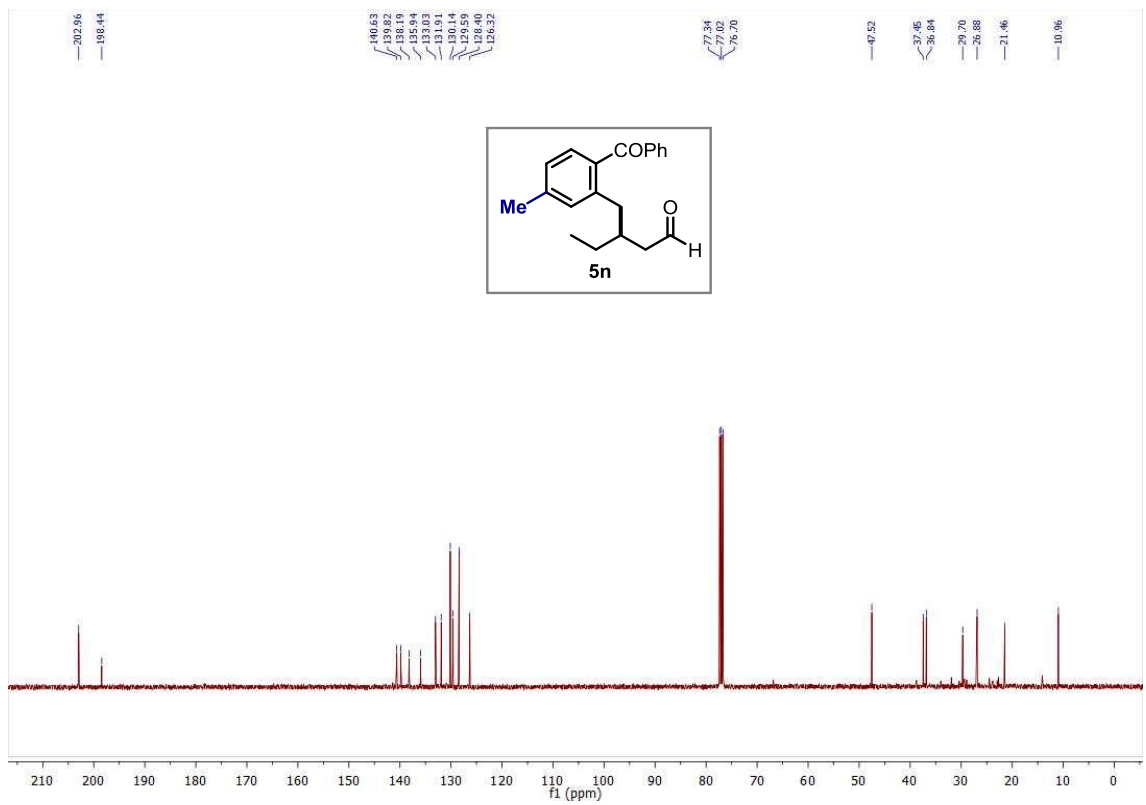

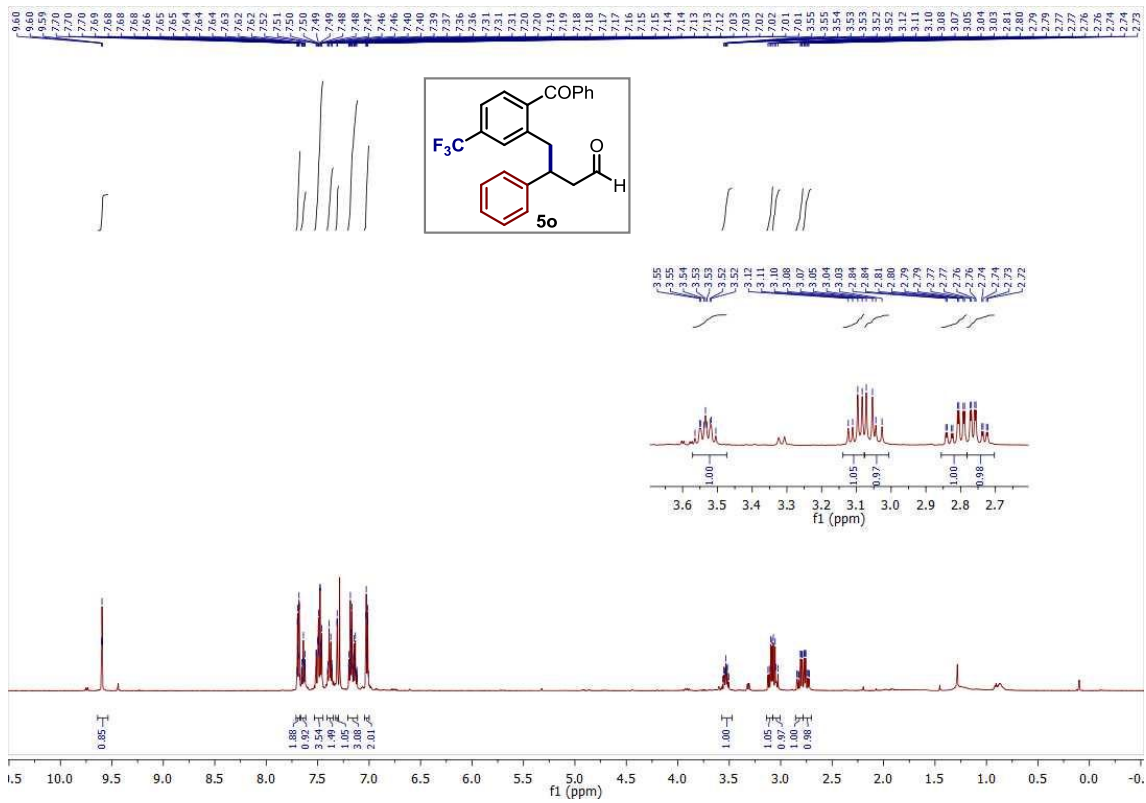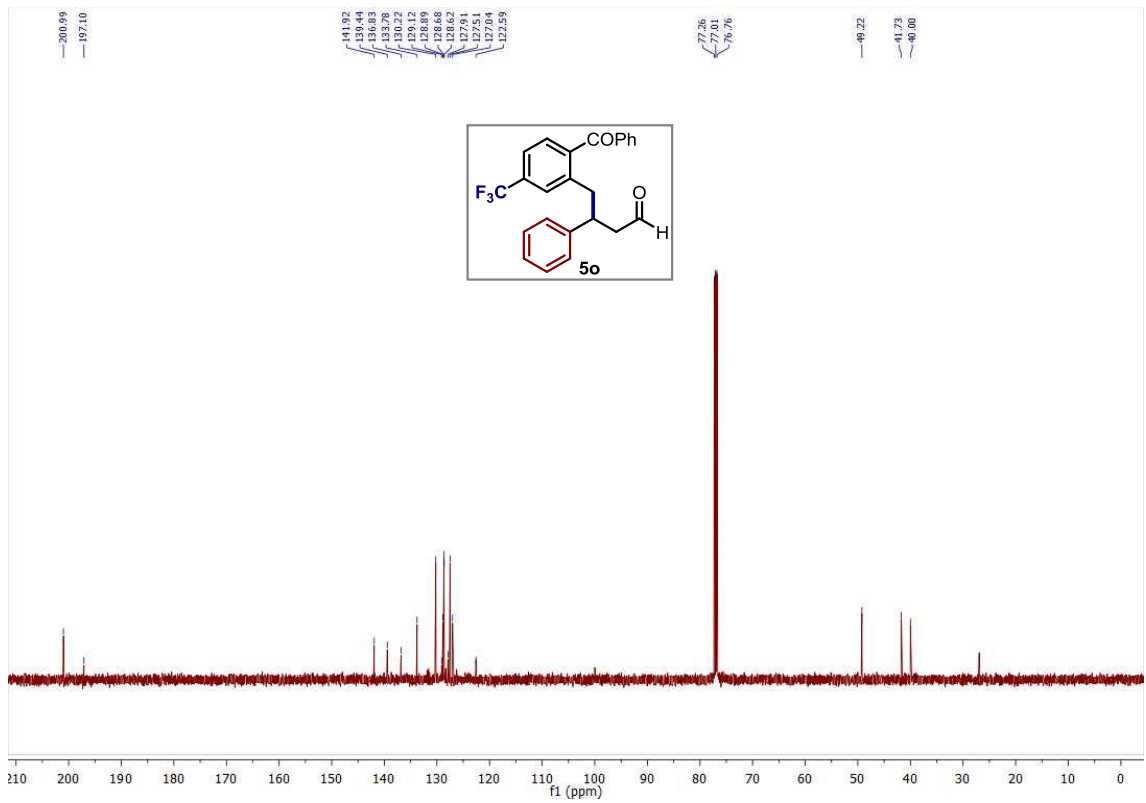



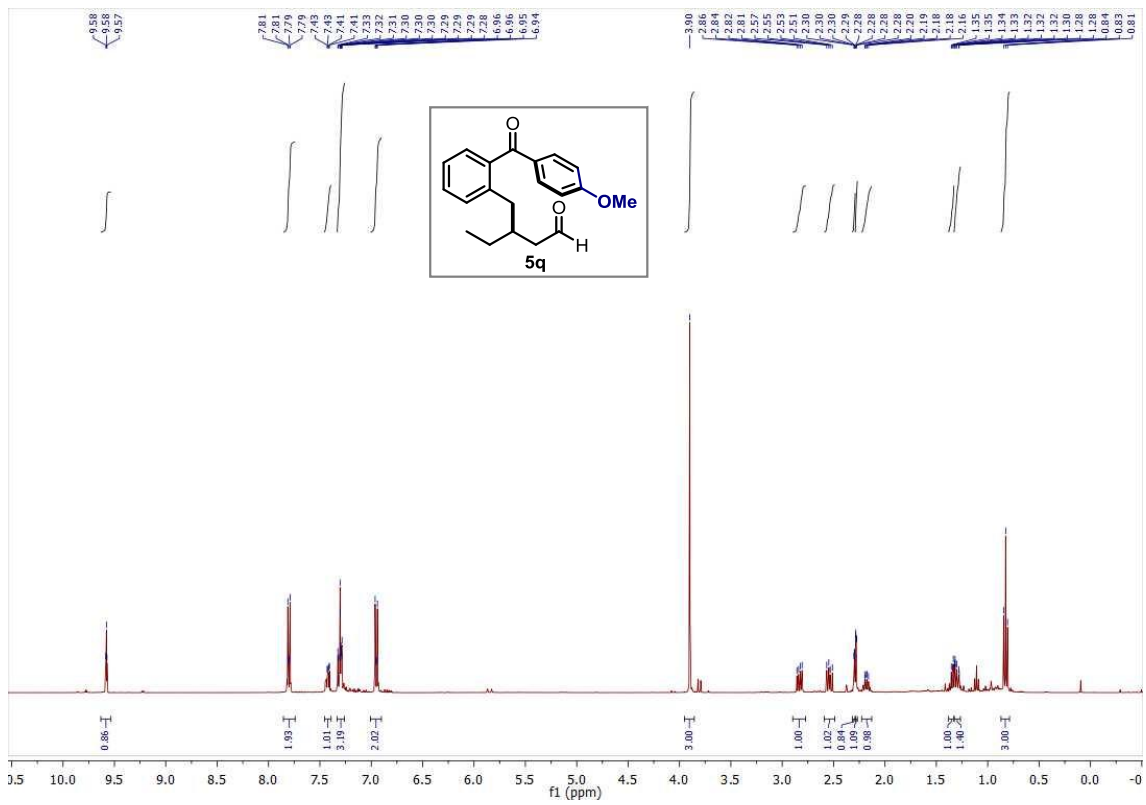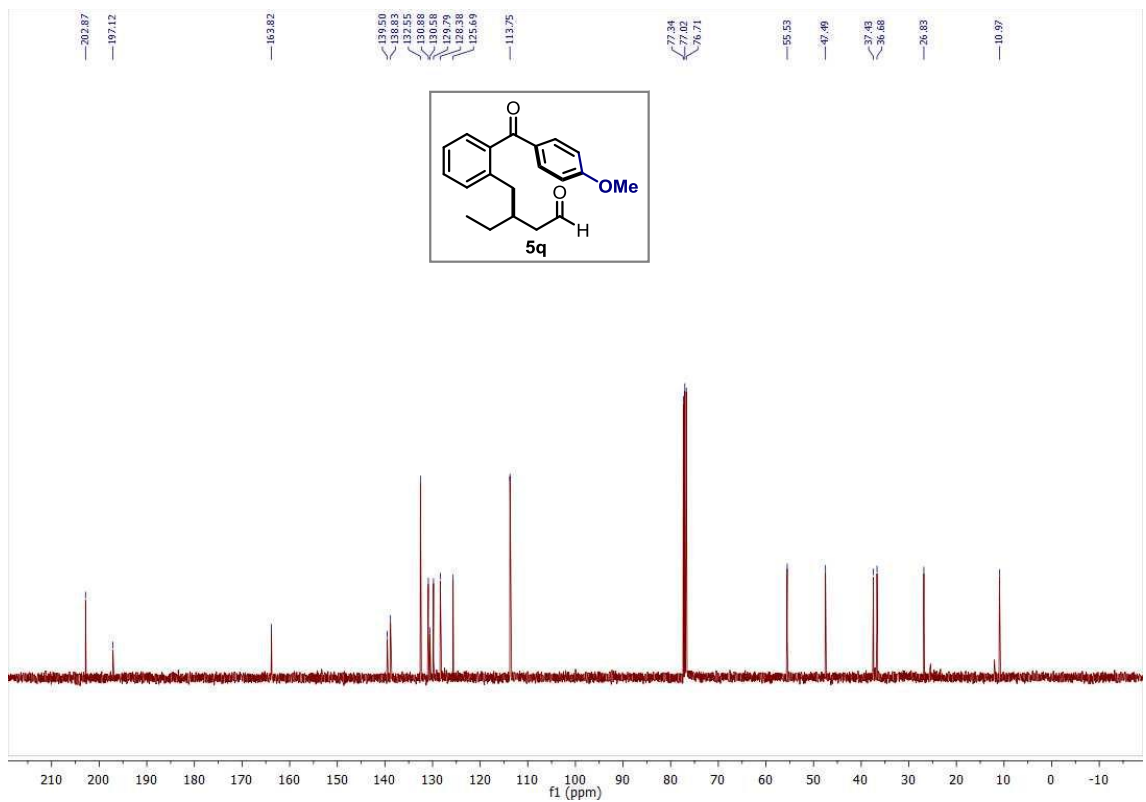





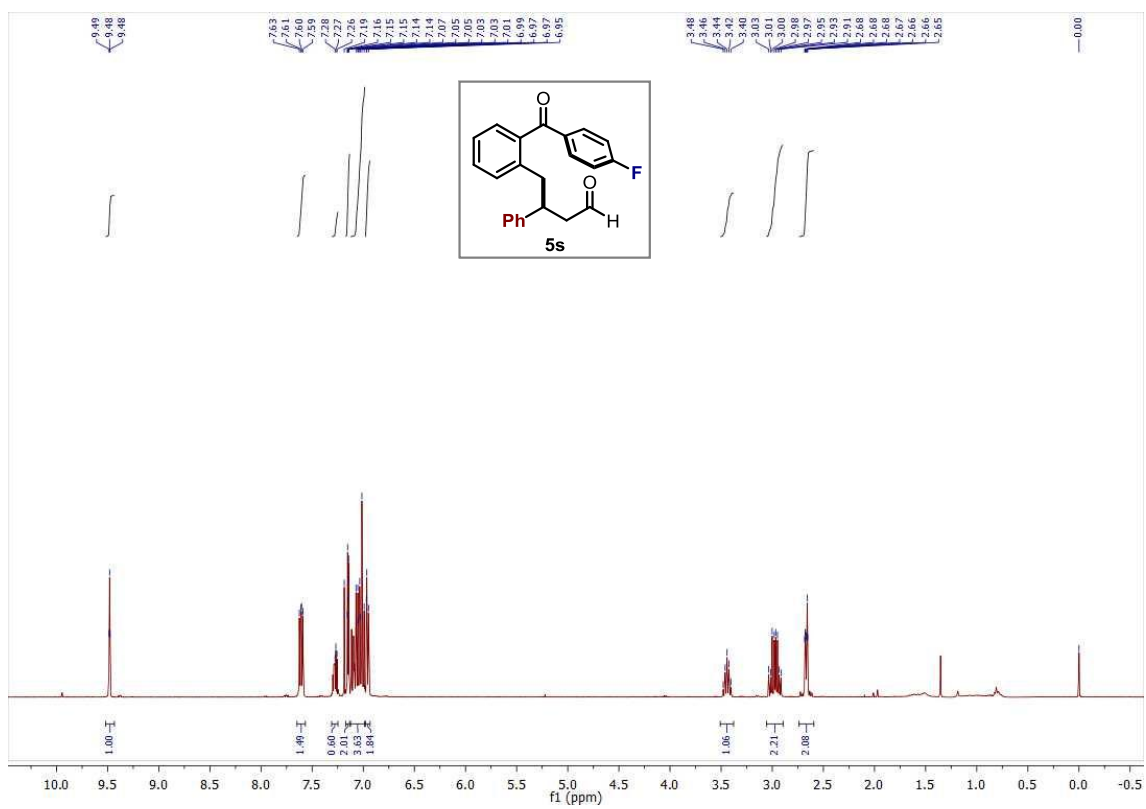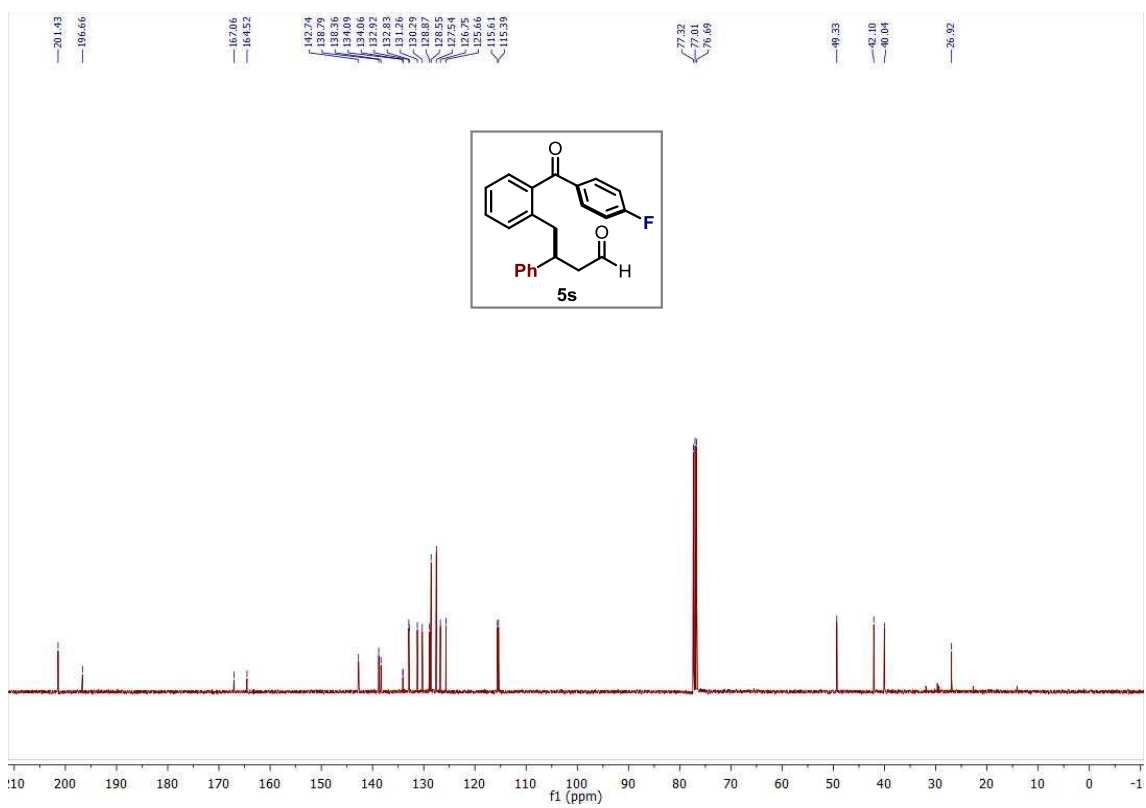

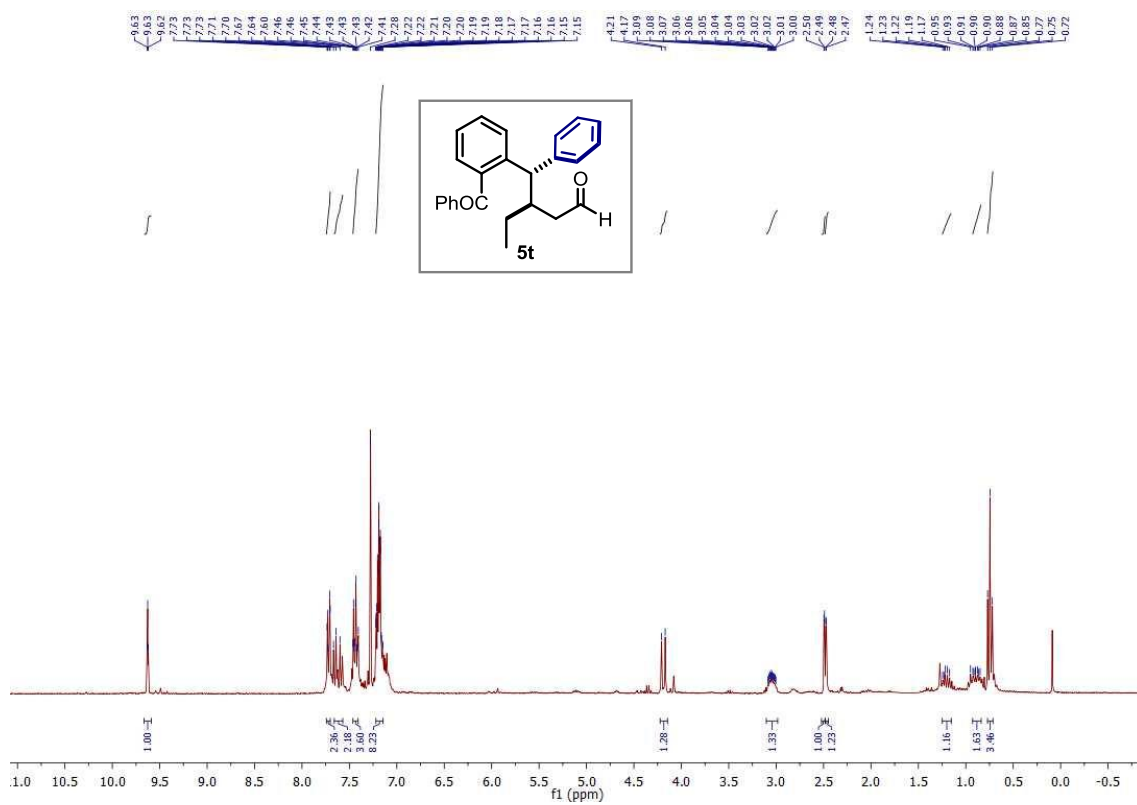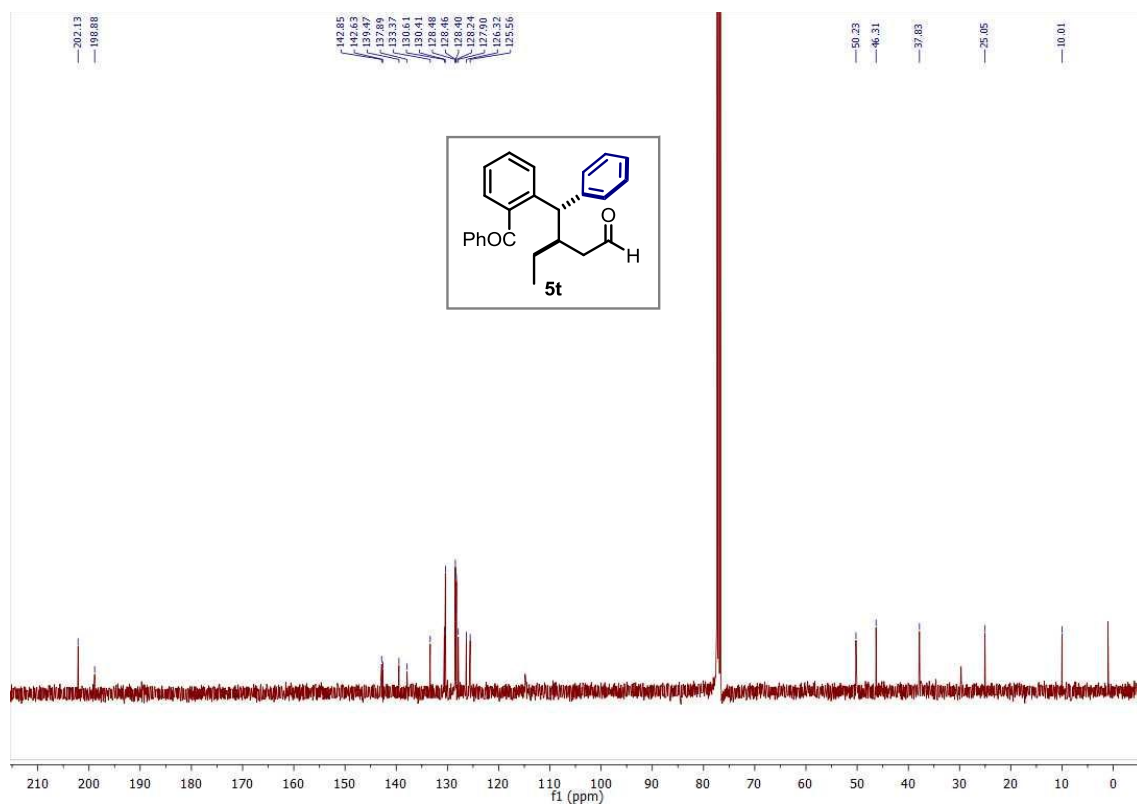

$^1\text{H}$ - $^1\text{H}$  COSY analysis of compound **5t**

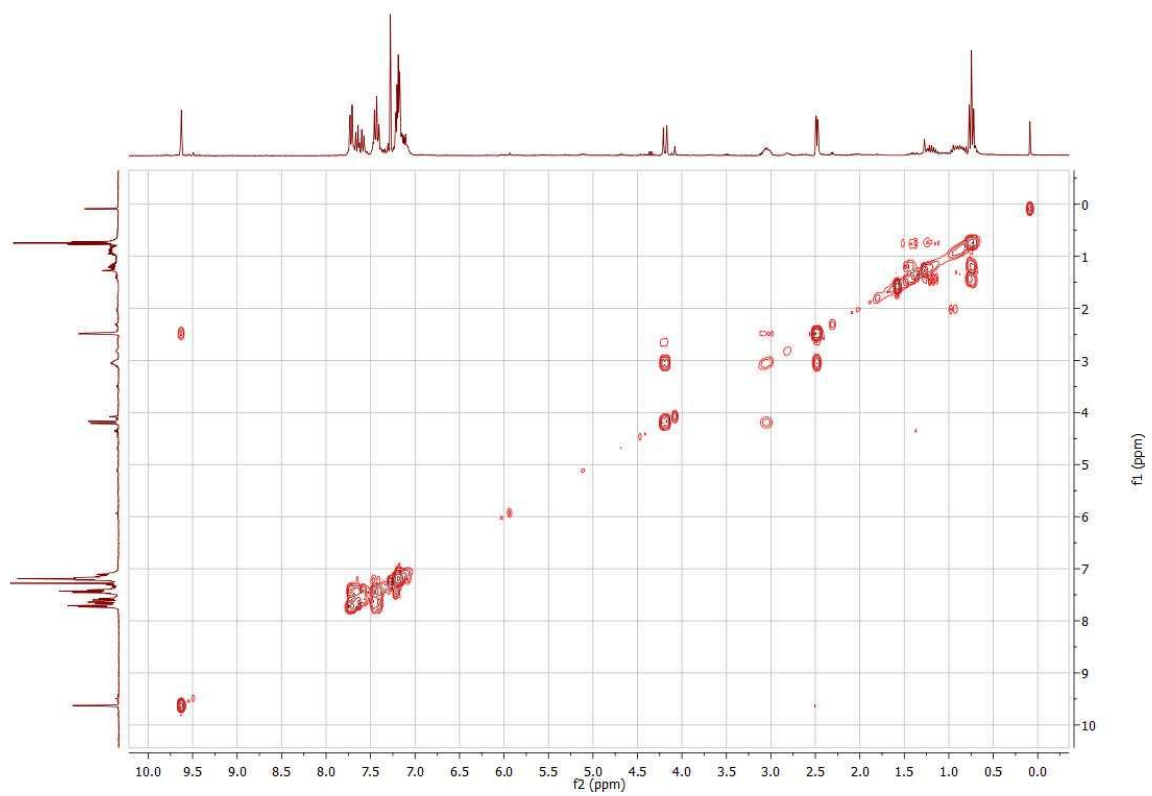

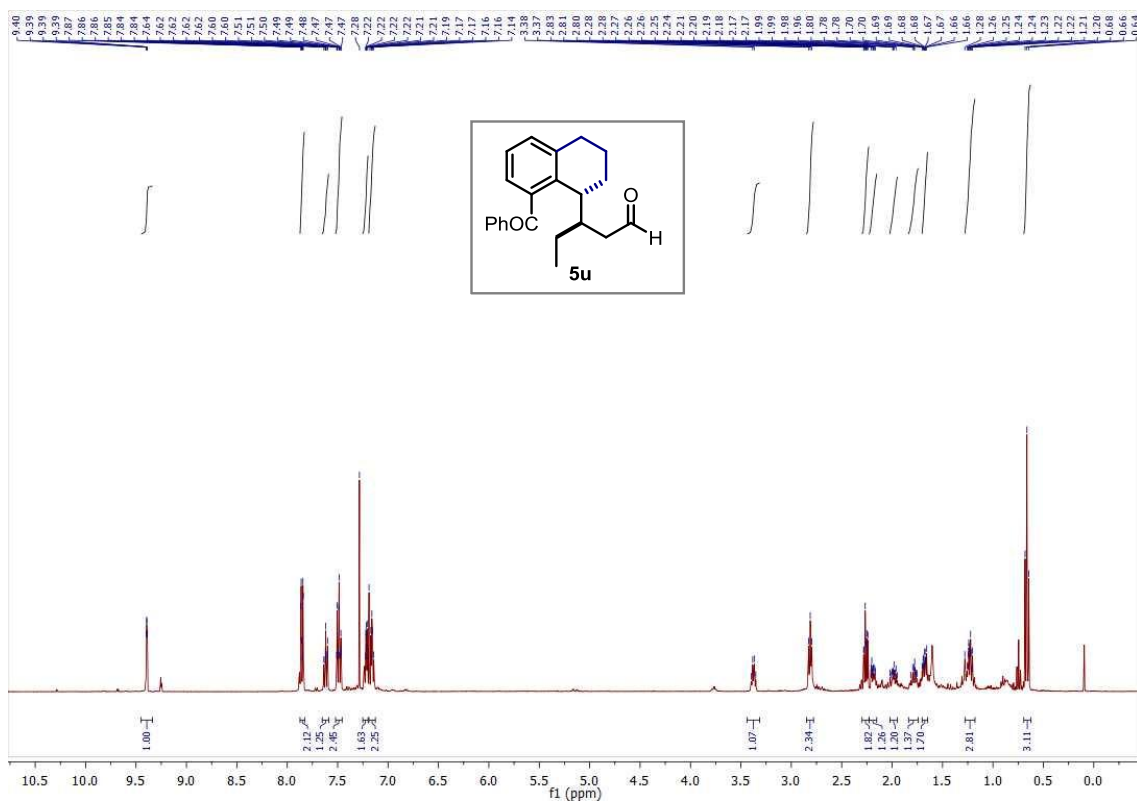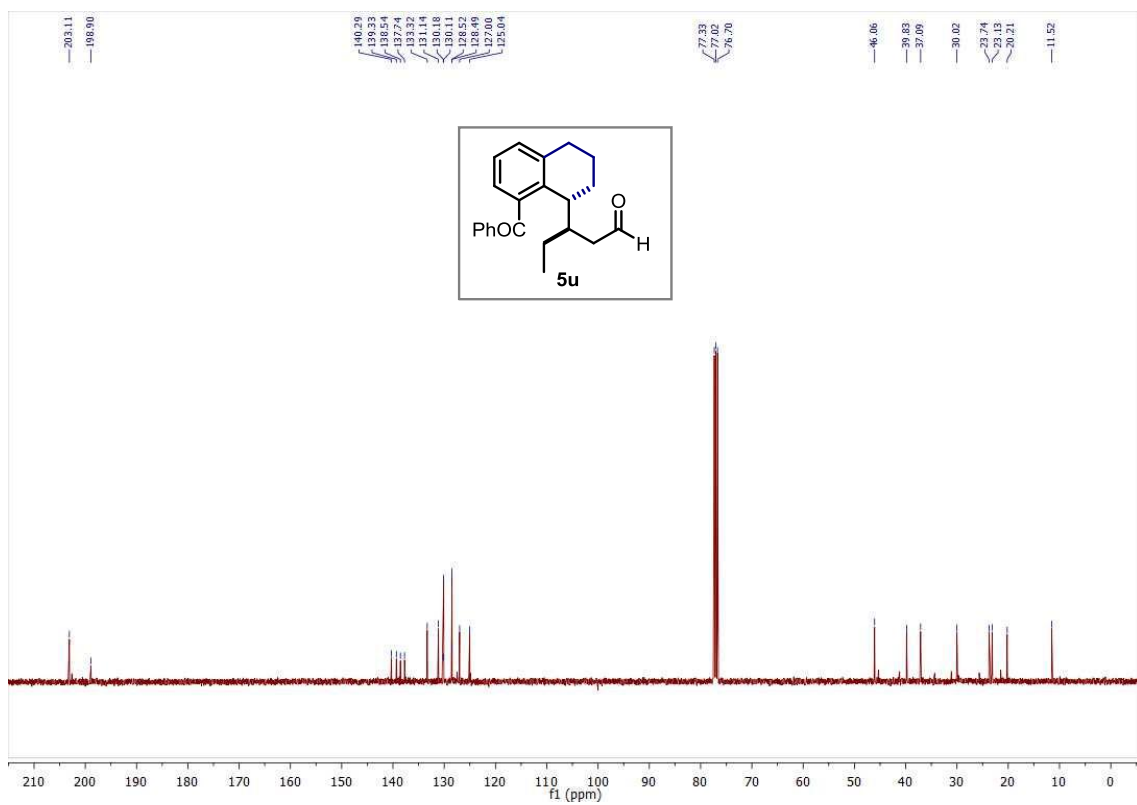

$^1\text{H}$ - $^1\text{H}$  COSY analysis for compound **5u**

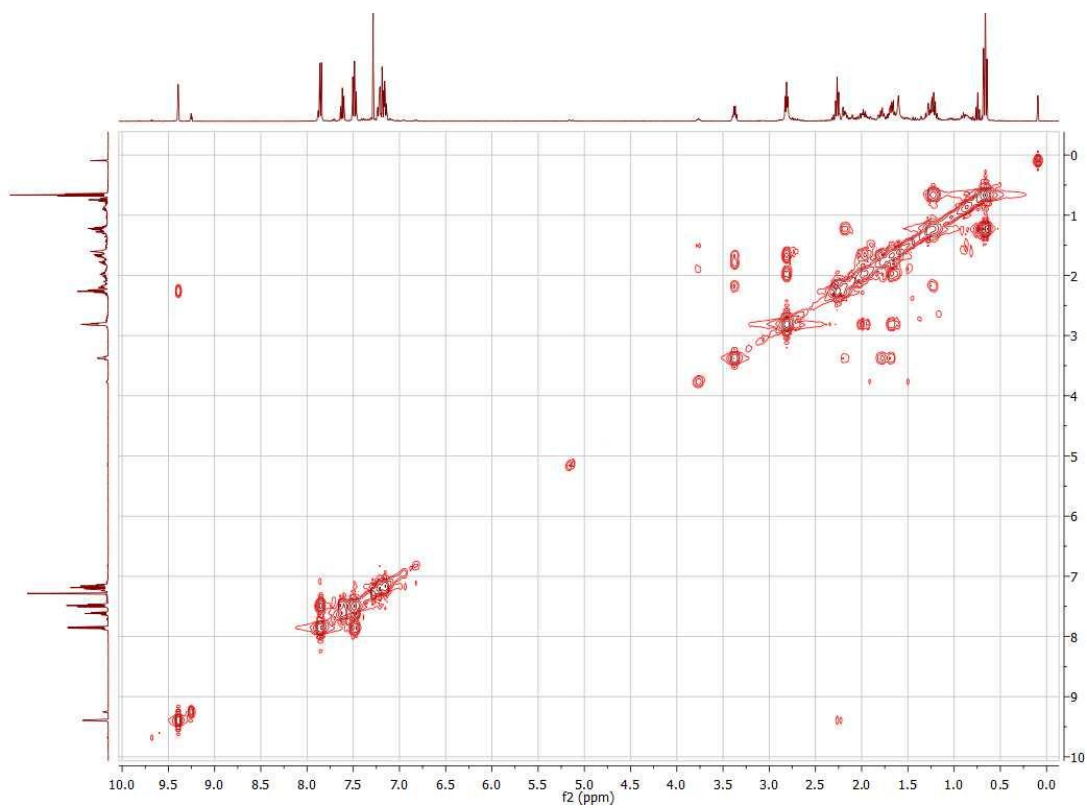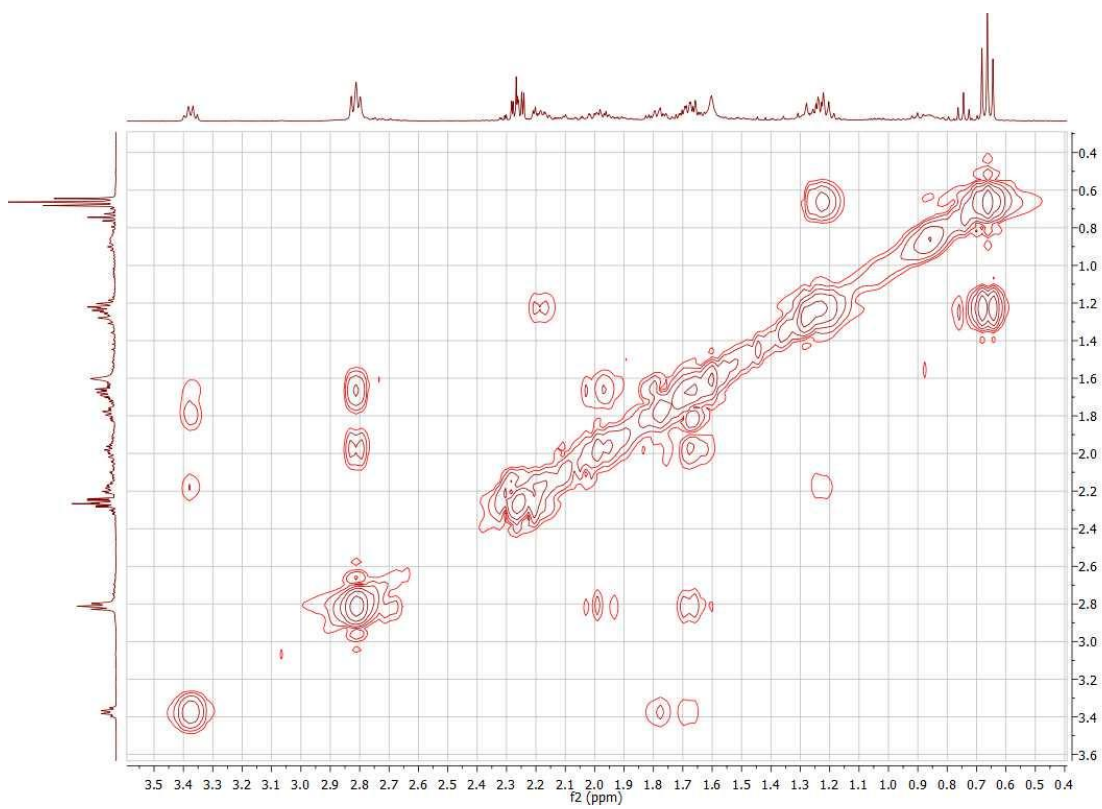



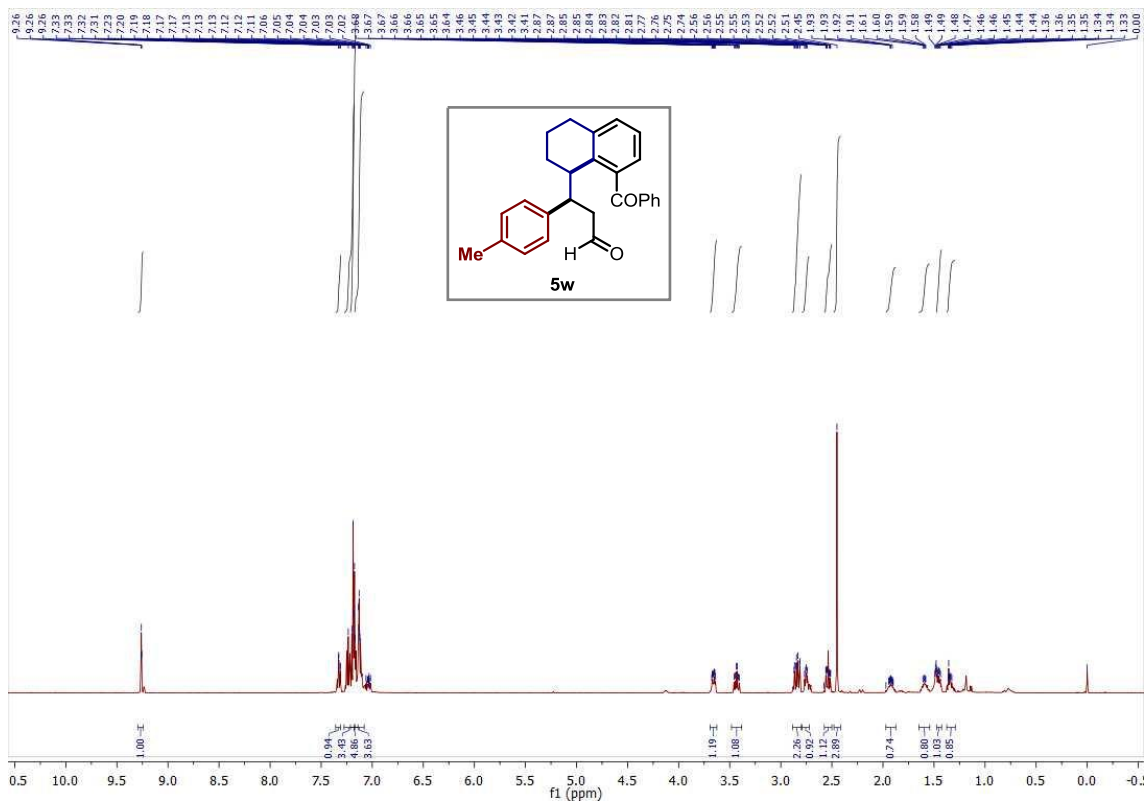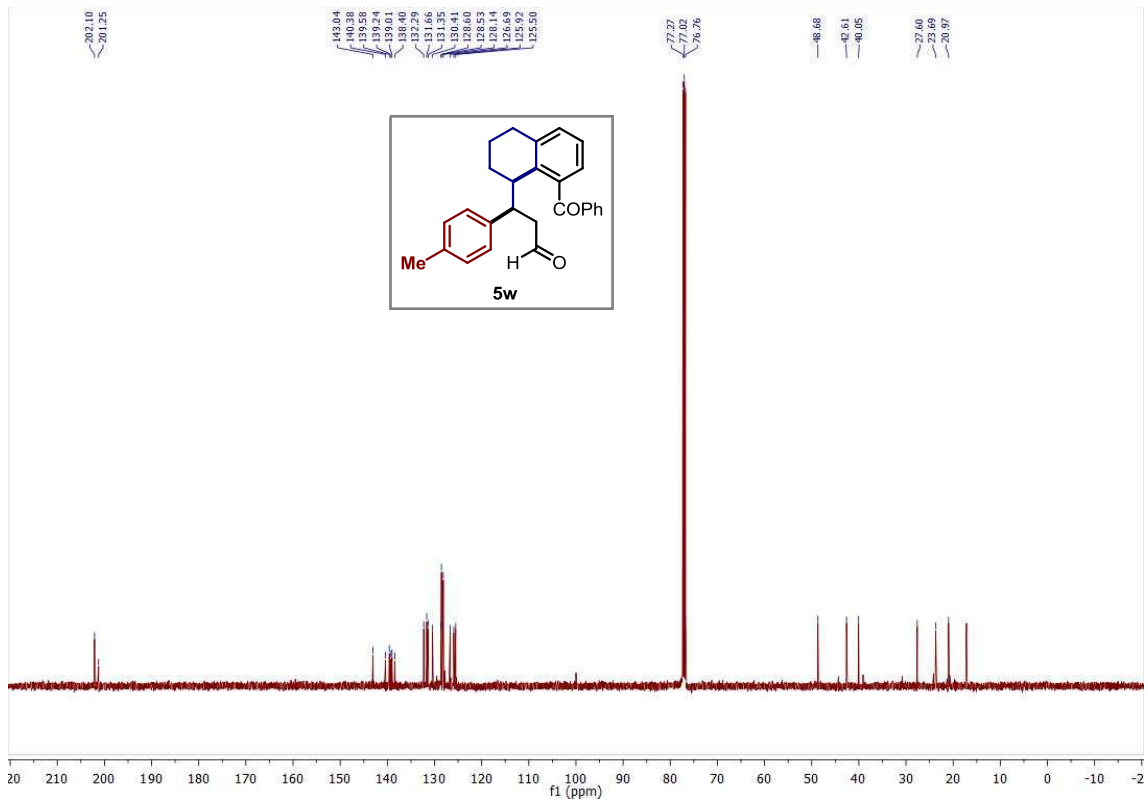

$^1\text{H}$ - $^1\text{H}$  COSY analysis for compound **5W**

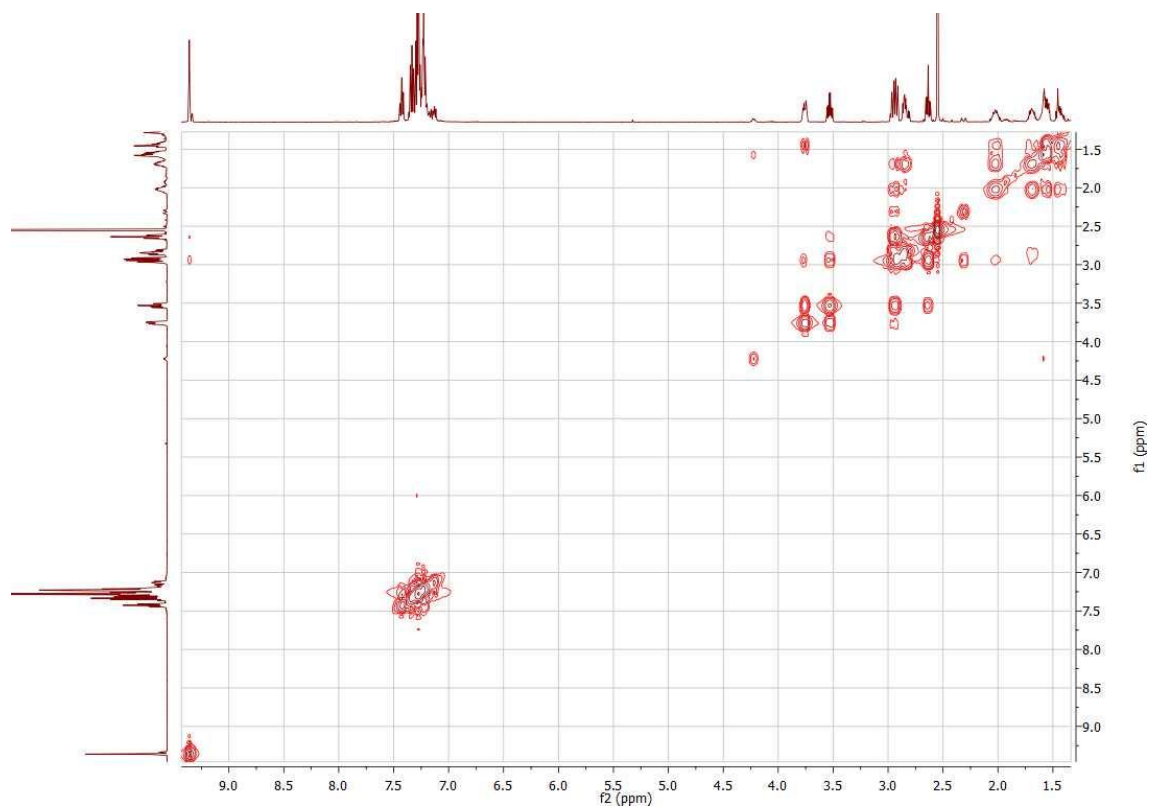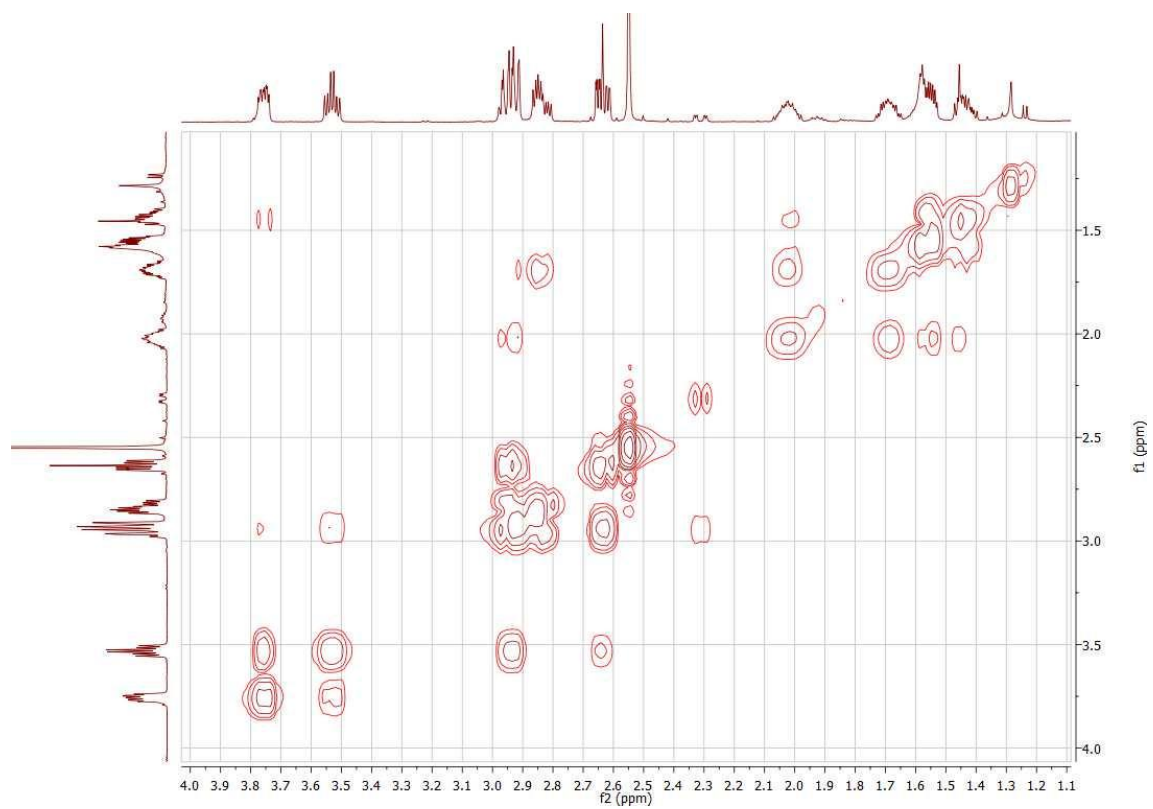



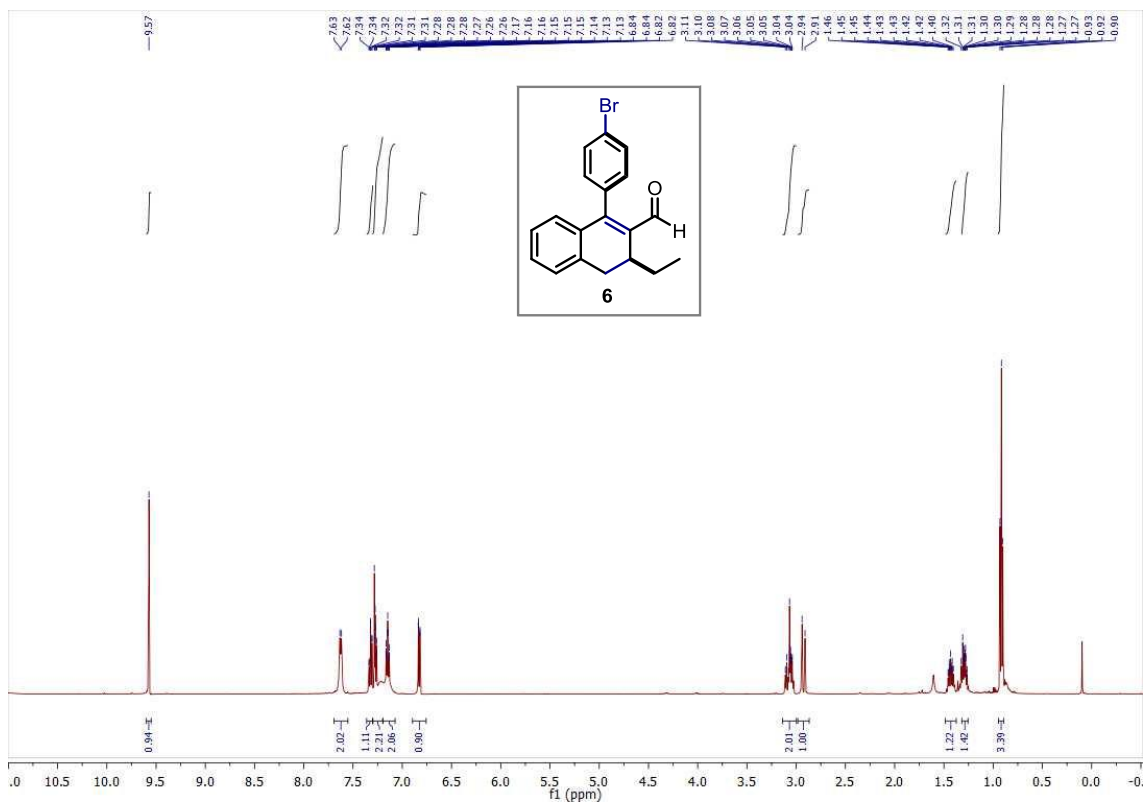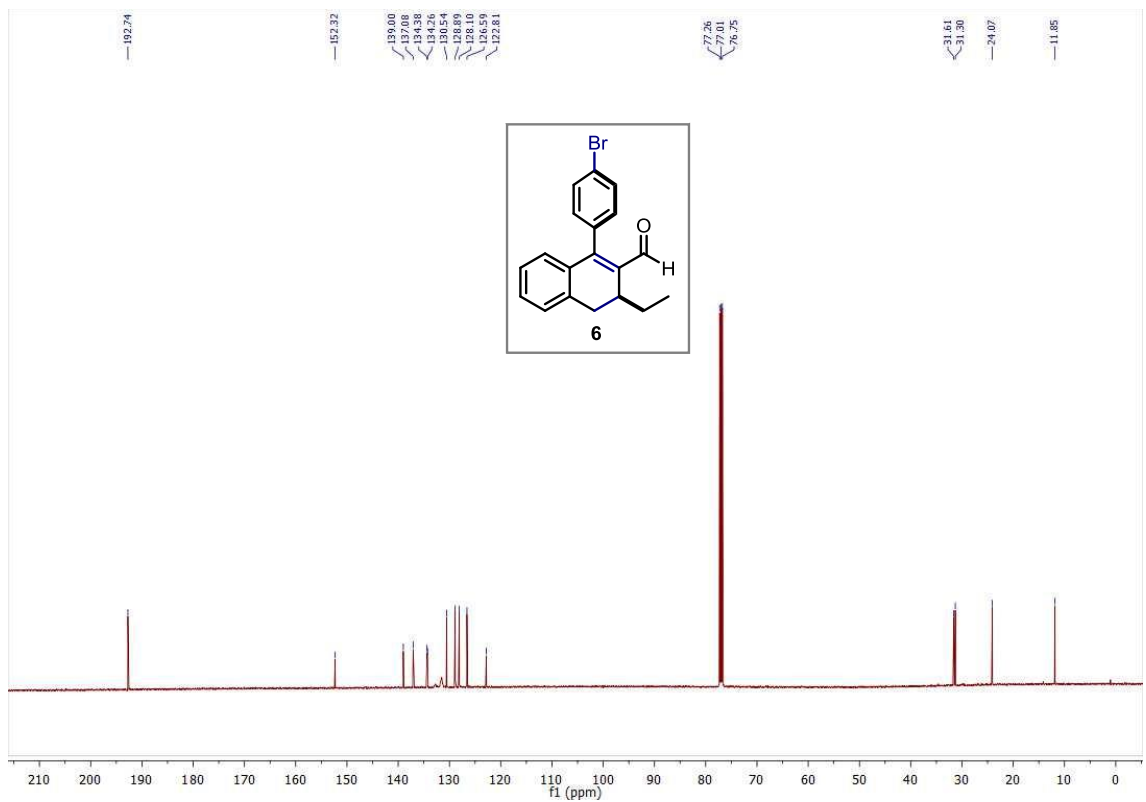

## H. HPLC Traces

**Condition:** HPLC analysis on a Daicel Chiralpak IC-3 column using an isocratic method (Hexane : i-PrOH, 85:15), flow rate 1.0 mL/min;  $\lambda = 254 \text{ nm}$

**Racemic sample 5a:**

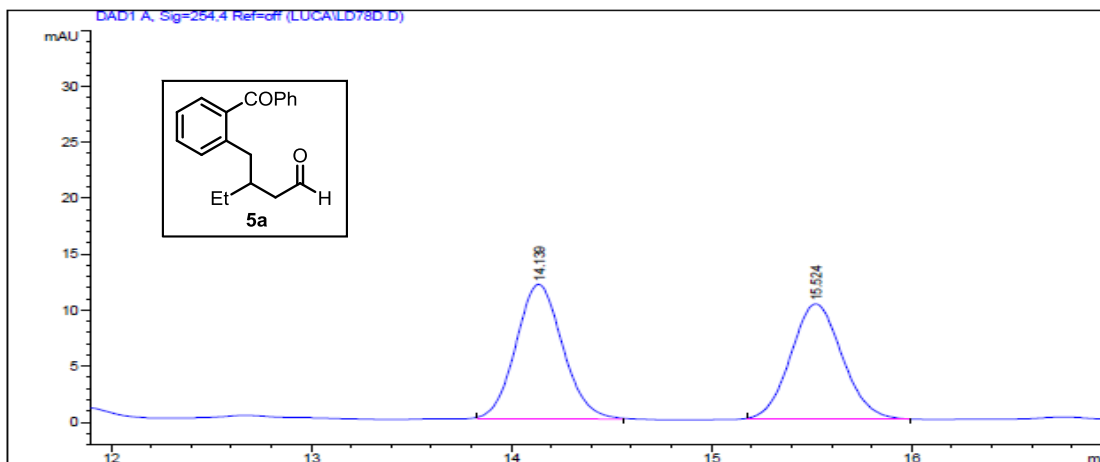

| Peak # | RetTime [min] | Type | Width [min] | Area [mAU*s] | Height [mAU] | Area %  |
|--------|---------------|------|-------------|--------------|--------------|---------|
| 1      | 14.139        | BB   | 0.2519      | 195.47308    | 12.01039     | 51.4076 |
| 2      | 15.524        | BB   | 0.2792      | 184.76846    | 10.30286     | 48.5924 |

**Enantioenriched sample 5a (0.2 mmol reaction scale):**

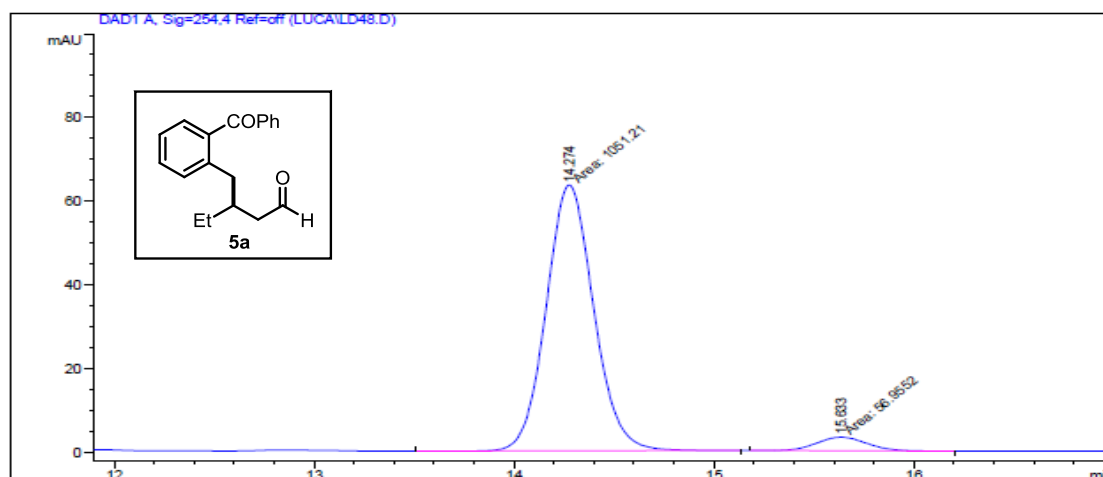

| Peak # | RetTime [min] | Type | Width [min] | Area [mAU*s] | Height [mAU] | Area %  |
|--------|---------------|------|-------------|--------------|--------------|---------|
| 1      | 14.274        | MM   | 0.2757      | 1051.20886   | 63.54309     | 94.8604 |
| 2      | 15.633        | MM   | 0.2934      | 56.95524     | 3.23578      | 5.1396  |

**Condition:** HPLC analysis on a Daicel Chiralpak IC-3 column using an isocratic method (Hexane : i-PrOH, 85:15), flow rate 1.0 mL/min;  $\lambda = 254 \text{ nm}$

**Racemic sample 5a (1mmol reaction scale):**

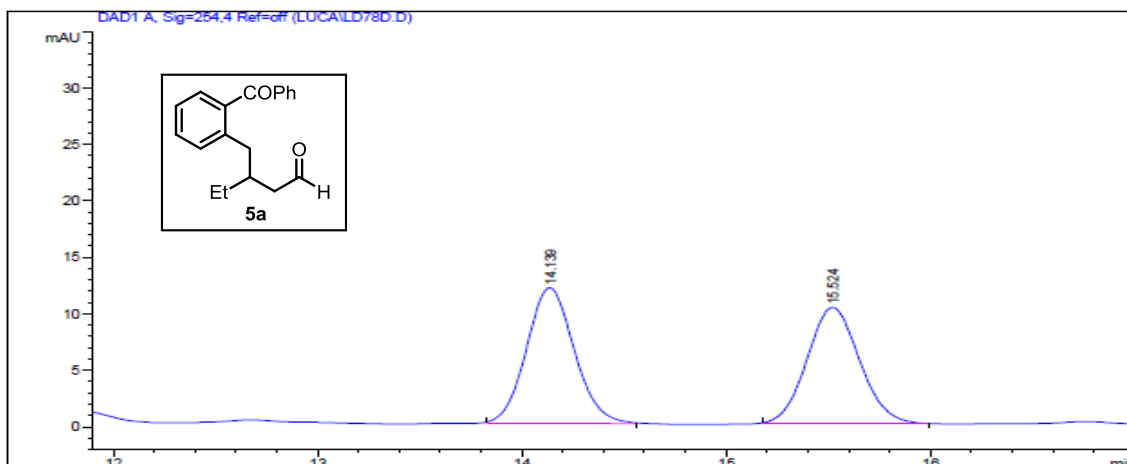

| Peak # | RetTime [min] | Type | Width [min] | Area [mAU*s] | Height [mAU] | Area %  |
|--------|---------------|------|-------------|--------------|--------------|---------|
| 1      | 14.139        | BB   | 0.2519      | 195.47308    | 12.01039     | 51.4076 |
| 2      | 15.524        | BB   | 0.2792      | 184.76846    | 10.30286     | 48.5924 |

**Enantioenriched sample 5a (1 mmol reaction scale):**

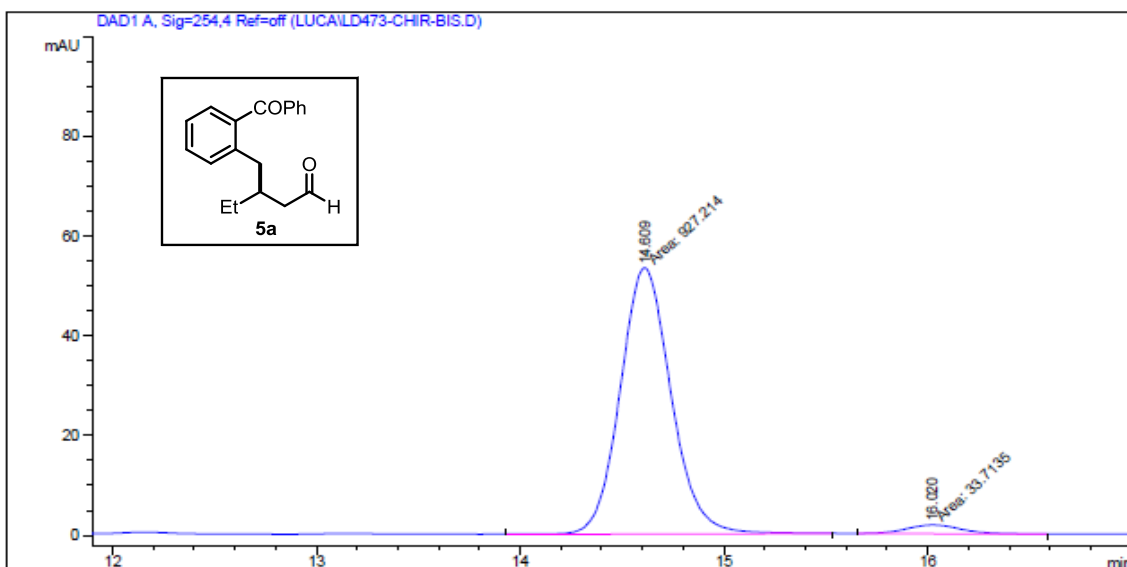

| Peak # | RetTime [min] | Type | Width [min] | Area [mAU*s] | Height [mAU] | Area %  |
|--------|---------------|------|-------------|--------------|--------------|---------|
| 1      | 14.609        | MM   | 0.2895      | 927.21368    | 53.37656     | 96.4916 |
| 2      | 16.020        | MM   | 0.3157      | 33.71346     | 1.77991      | 3.5084  |

**Condition:** HPLC analysis on a Daicel Chiralpak IC-3 column using an isocratic method (Hexane : i-PrOH, 85:15), flow rate 1.0 mL/min;  $\lambda = 254 \text{ nm}$

**Racemic sample 5b:**

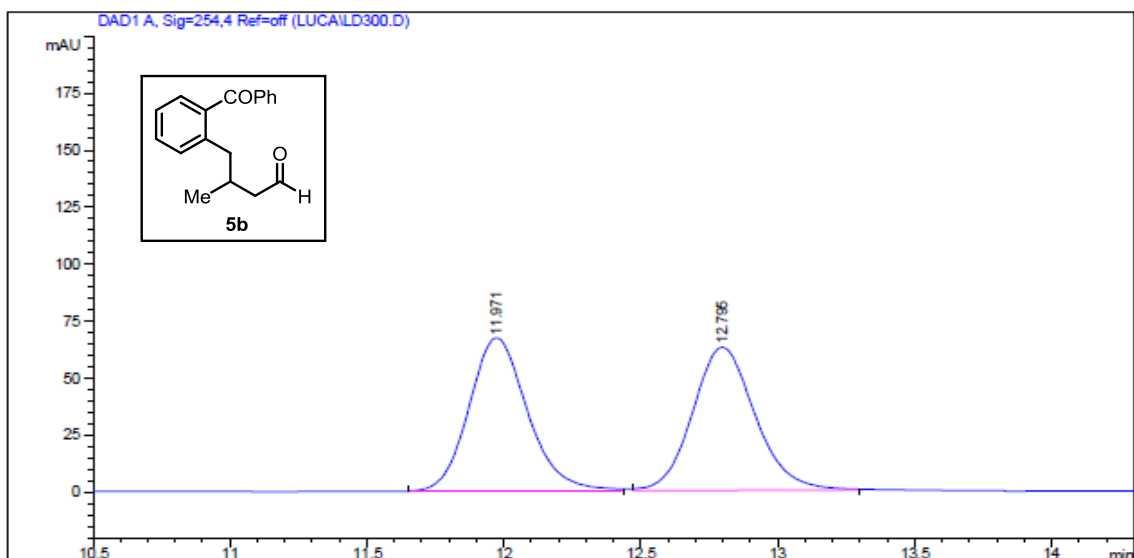

| Peak # | RetTime [min] | Type | Width [min] | Area [mAU*s] | Height [mAU] | Area %  |
|--------|---------------|------|-------------|--------------|--------------|---------|
| 1      | 11.971        | BB   | 0.2273      | 997.54041    | 67.15819     | 50.0027 |
| 2      | 12.795        | BB   | 0.2453      | 997.43158    | 62.79693     | 49.9973 |

**Enantioenriched sample 5b:**

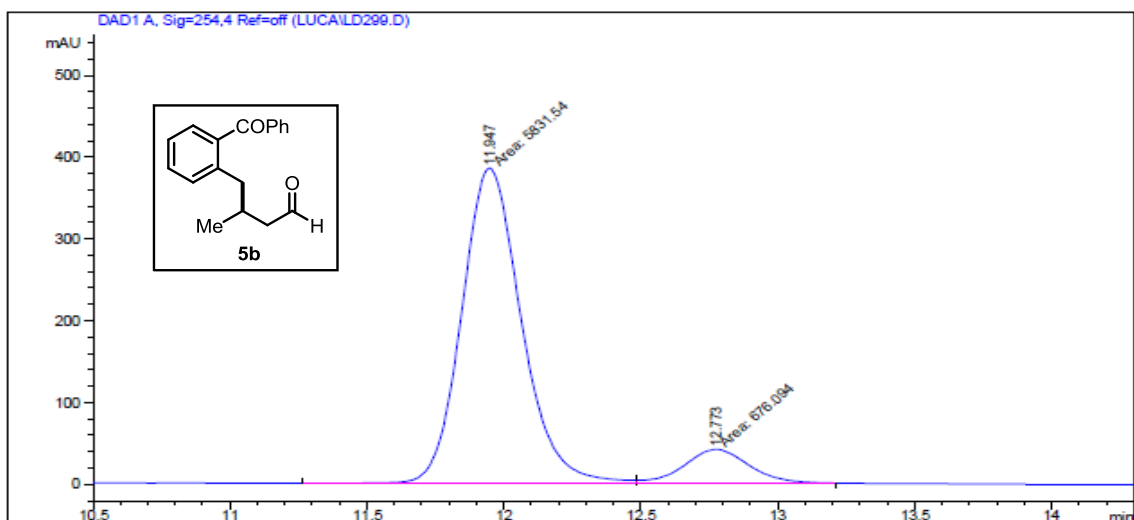

| Peak # | RetTime [min] | Type | Width [min] | Area [mAU*s] | Height [mAU] | Area %  |
|--------|---------------|------|-------------|--------------|--------------|---------|
| 1      | 11.947        | MF   | 0.2520      | 5831.54297   | 385.67615    | 89.6108 |
| 2      | 12.773        | FM   | 0.2735      | 676.09412    | 41.20249     | 10.3892 |

**Condition:** HPLC analysis on a Daicel Chiralpak IC-3 column using an isocratic method (Hexane : i-PrOH, 90:10), flow rate 1.0 mL/min;  $\lambda = 215 \text{ nm}$

**Racemic sample 5c:**

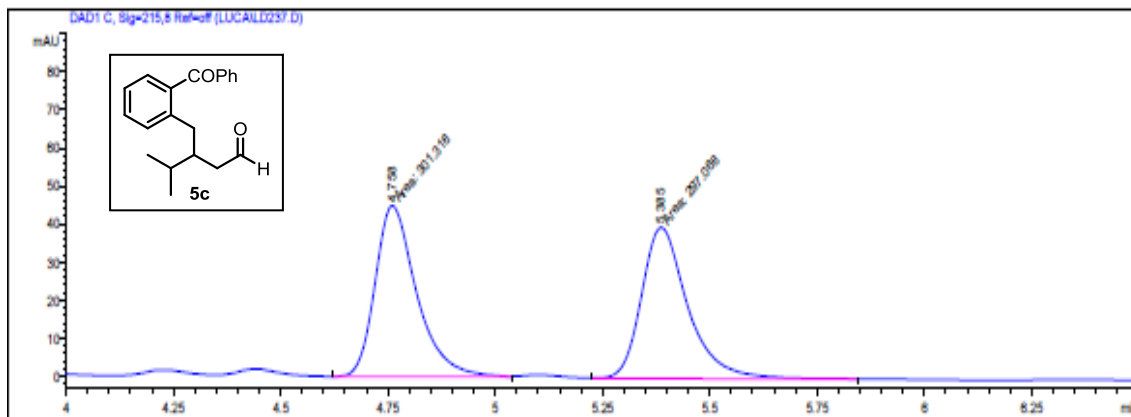

| Peak # | RetTime [min] | Type | Width [min] | Area [mAU*s] | Height [mAU] | Area %  |
|--------|---------------|------|-------------|--------------|--------------|---------|
| 1      | 4.758         | MM   | 0.1114      | 301.31821    | 45.07009     | 50.3551 |
| 2      | 5.385         | MM   | 0.1245      | 297.06821    | 39.77979     | 49.6449 |

**Enantioenriched sample 5c:**

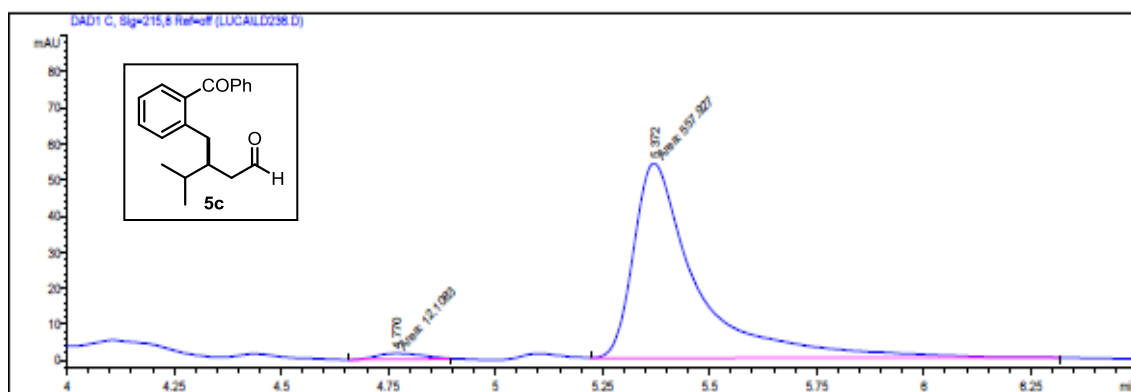

| Peak # | RetTime [min] | Type | Width [min] | Area [mAU*s] | Height [mAU] | Area %  |
|--------|---------------|------|-------------|--------------|--------------|---------|
| 1      | 4.770         | MM   | 0.1223      | 12.10833     | 1.64966      | 2.1241  |
| 2      | 5.372         | MM   | 0.1718      | 557.92670    | 54.11789     | 97.8759 |

**Condition:** HPLC analysis on a Daicel Chiralpak IC-3 column using an isocratic method (Hexane : i-PrOH, 90:10), flow rate 1.0 mL/min;  $\lambda = 254$  nm

**Racemic sample 5e:**

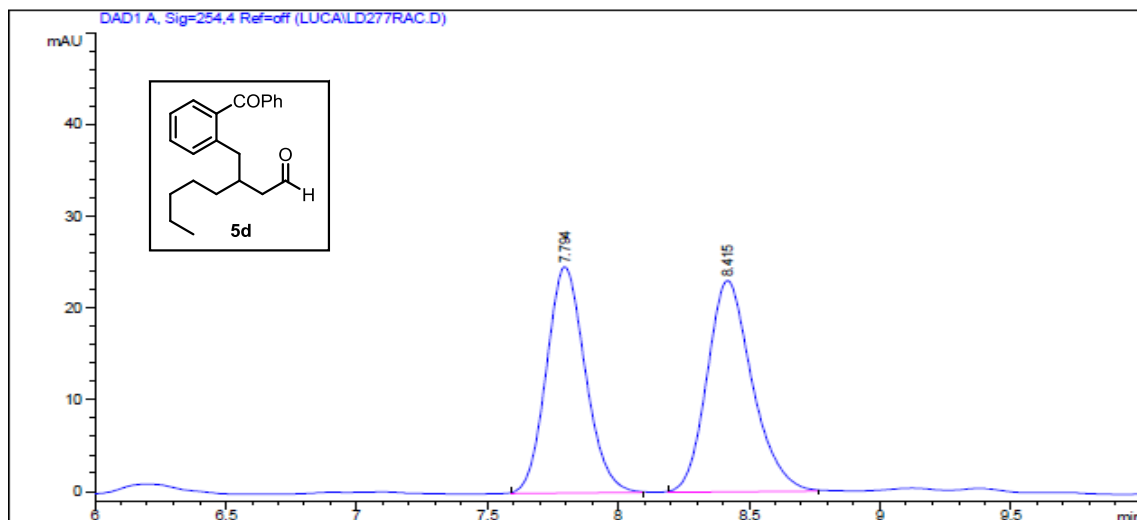

| Peak # | RetTime [min] | Type | Width [min] | Area [mAU*s] | Height [mAU] | Area %  |
|--------|---------------|------|-------------|--------------|--------------|---------|
| 1      | 7.794         | BB   | 0.1610      | 255.80396    | 24.67247     | 48.0334 |
| 2      | 8.415         | BB   | 0.1821      | 276.75043    | 23.05053     | 51.9666 |

**Enantioenriched sample 5e:**

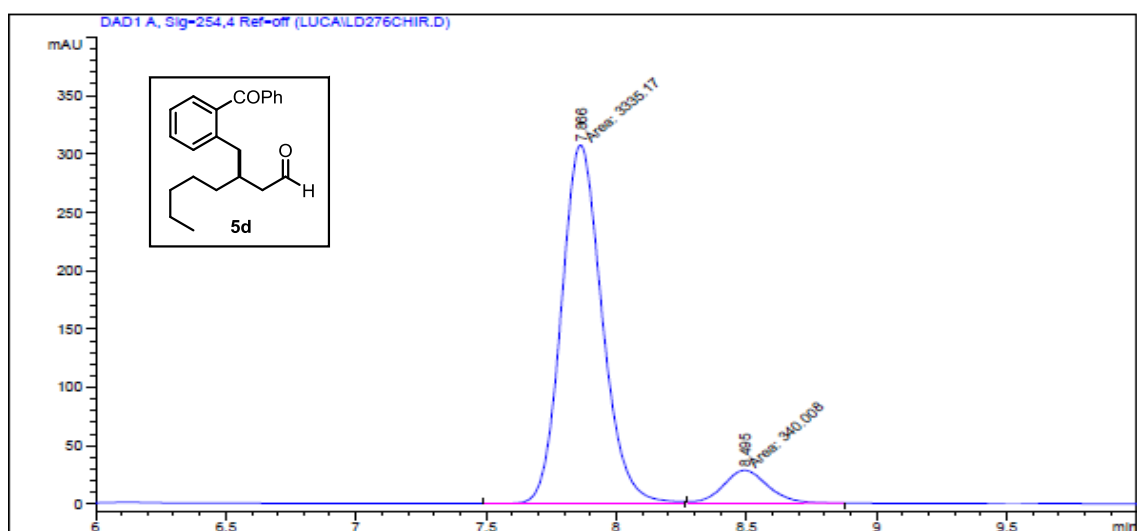

| Peak # | RetTime [min] | Type | Width [min] | Area [mAU*s] | Height [mAU] | Area %  |
|--------|---------------|------|-------------|--------------|--------------|---------|
| 1      | 7.866         | MF   | 0.1807      | 3335.17310   | 307.64209    | 90.7485 |
| 2      | 8.495         | FM   | 0.2002      | 340.00772    | 28.30513     | 9.2515  |

**Condition:** HPLC analysis on a Daicel Chiralpak IC column using an isocratic method (Hexane : i-PrOH, 85:15), flow rate 0.9 mL/min;  $\lambda = 254 \text{ nm}$

**Racemic sample 5e:**

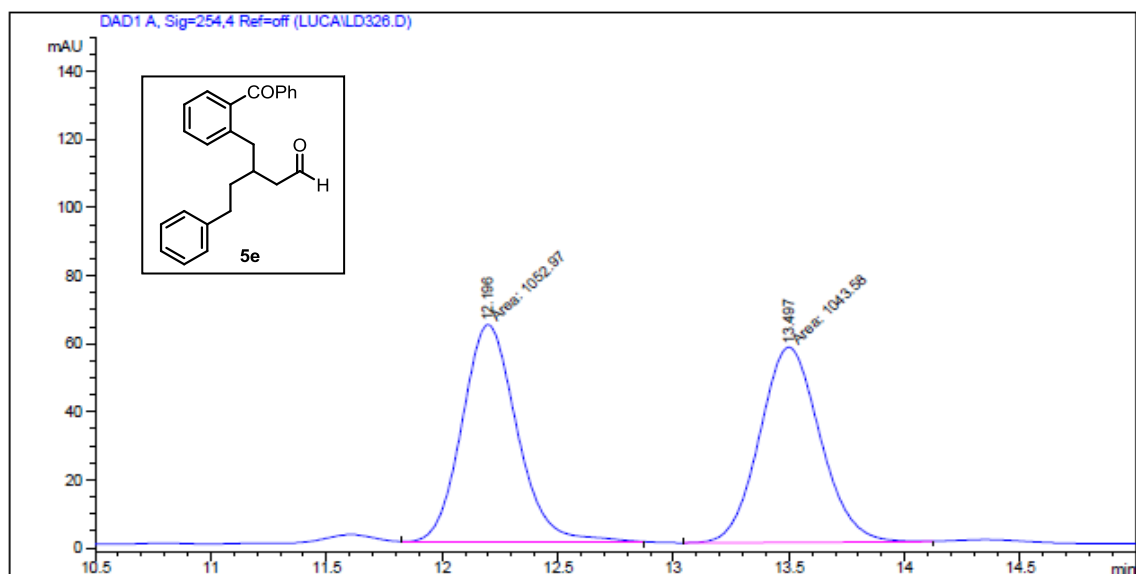

| Peak # | RetTime [min] | Type | Width [min] | Area [mAU*s] | Height [mAU] | Area %  |
|--------|---------------|------|-------------|--------------|--------------|---------|
| 1      | 12.196        | MM   | 0.2750      | 1052.97473   | 63.80602     | 50.2241 |
| 2      | 13.497        | MM   | 0.3035      | 1043.57886   | 57.30347     | 49.7759 |

**Enantioenriched sample 5e:**

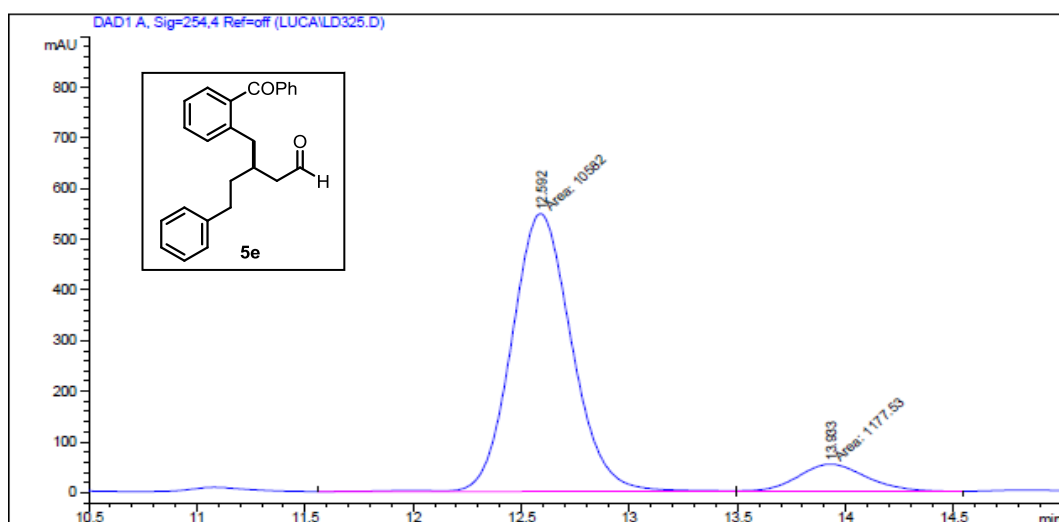

| Peak # | RetTime [min] | Type | Width [min] | Area [mAU*s] | Height [mAU] | Area %  |
|--------|---------------|------|-------------|--------------|--------------|---------|
| 1      | 12.592        | MF   | 0.3215      | 1.05820e4    | 548.56342    | 89.9866 |
| 2      | 13.933        | FM   | 0.3661      | 1177.53223   | 53.60737     | 10.0134 |

**Condition:** HPLC analysis on a Daicel Chiralpak IC-3 column using an isocratic method (Hexane : i-PrOH, 91:9), flow rate 0.5 mL/min;  $\lambda = 254 \text{ nm}$

**Racemic sample 5f:**

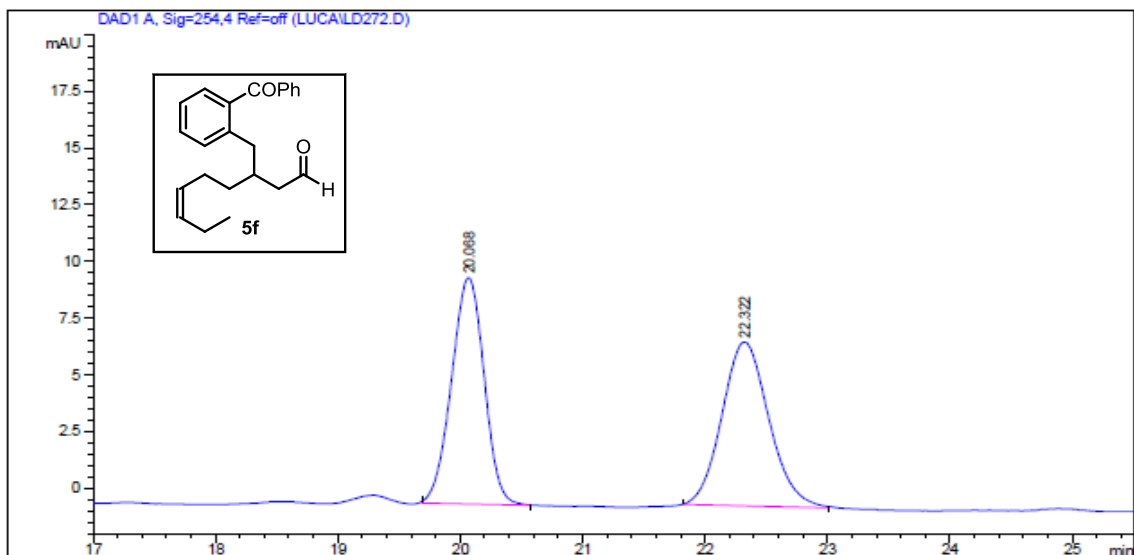

| Peak # | RetTime [min] | Type | Width [min] | Area [mAU*s] | Height [mAU] | Area %  |
|--------|---------------|------|-------------|--------------|--------------|---------|
| 1      | 20.068        | BB   | 0.2926      | 185.21207    | 9.97773      | 49.0140 |
| 2      | 22.322        | BB   | 0.4069      | 192.66386    | 7.23025      | 50.9860 |

**Enantioenriched sample 5f:**

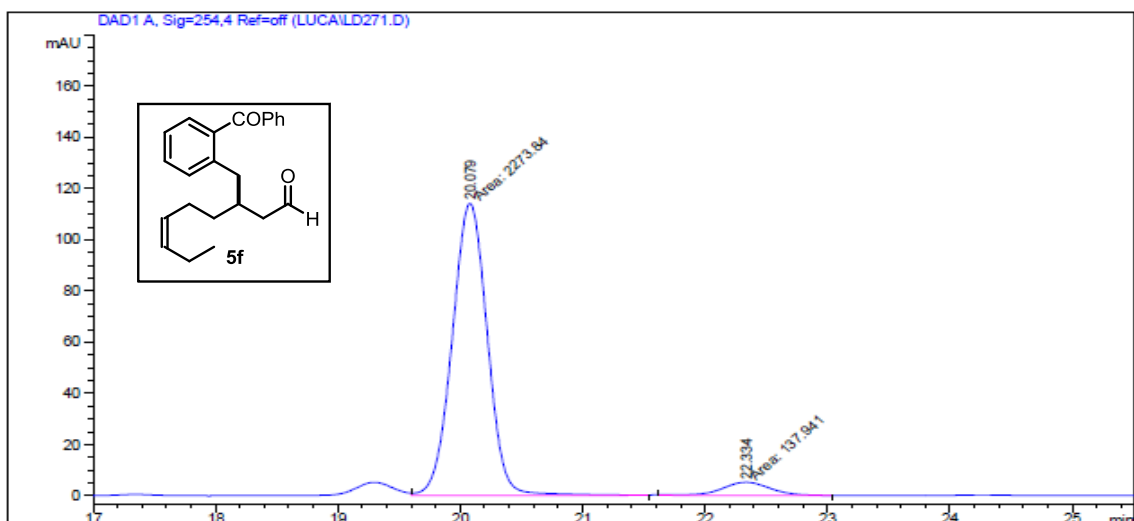

| Peak # | RetTime [min] | Type | Width [min] | Area [mAU*s] | Height [mAU] | Area %  |
|--------|---------------|------|-------------|--------------|--------------|---------|
| 1      | 20.079        | FM   | 0.3323      | 2273.84302   | 114.03586    | 94.2805 |
| 2      | 22.334        | MM   | 0.4458      | 137.94115    | 5.15714      | 5.7195  |



**Condition:** HPLC analysis on a Daicel Chiralpak ID-3 column using an isocratic method (Hexane : i-PrOH, 87:13), flow rate 0.9 mL/min;  $\lambda = 254 \text{ nm}$

**Racemic sample 5g:**

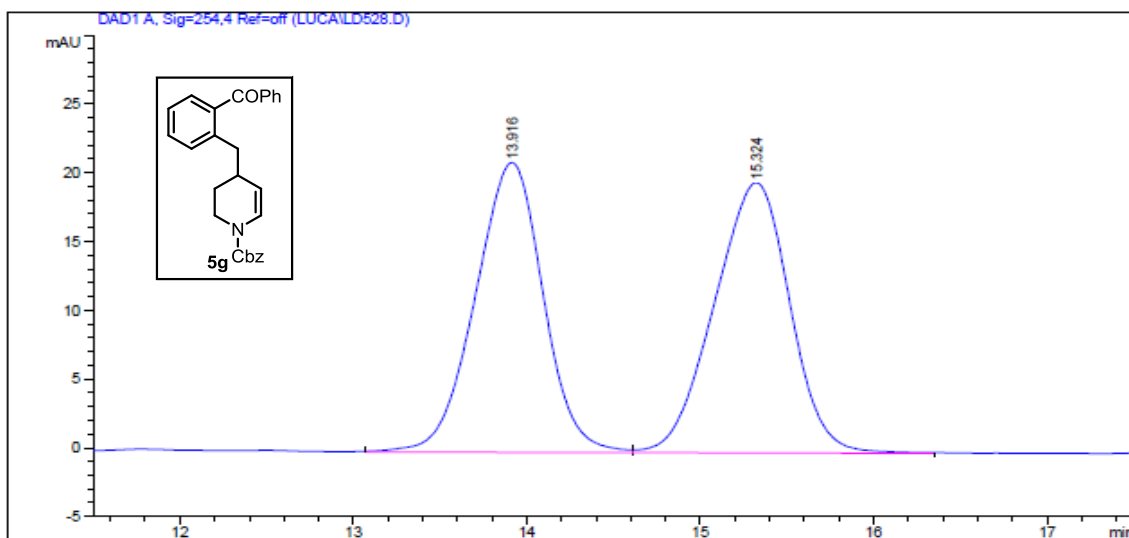

| Peak # | RetTime [min] | Type | Width [min] | Area [mAU*s] | Height [mAU] | Area %  |
|--------|---------------|------|-------------|--------------|--------------|---------|
| 1      | 13.916        | BV   | 0.4223      | 575.03198    | 21.07978     | 49.1767 |
| 2      | 15.324        | VB   | 0.4769      | 594.28571    | 19.64478     | 50.8233 |

**Enantioenriched sample 5g:**

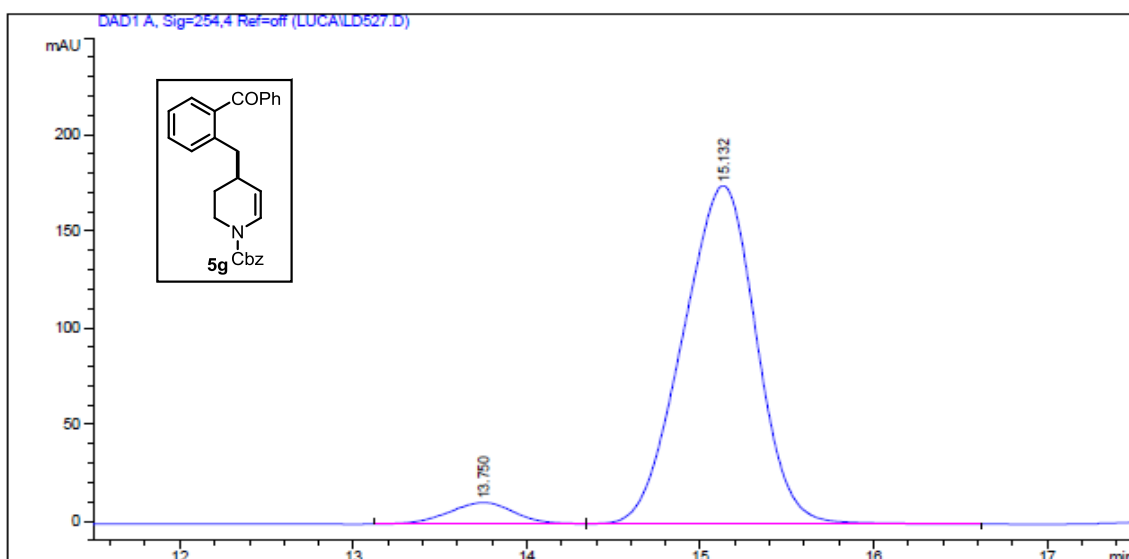

| Peak # | RetTime [min] | Type | Width [min] | Area [mAU*s] | Height [mAU] | Area %  |
|--------|---------------|------|-------------|--------------|--------------|---------|
| 1      | 13.750        | BV   | 0.4156      | 299.13678    | 11.20061     | 5.4673  |
| 2      | 15.132        | VB   | 0.4645      | 5172.23975   | 175.13730    | 94.5327 |

**Condition:** UPC<sup>2</sup> analysis on a Daicel Chiralpak IC column using a gradient method (from 100% CO<sub>2</sub> to 60:40 CO<sub>2</sub>:ACN), flow rate 2.00 mL/min over 5 min;  $\lambda = 248$  nm

**Racemic sample 5h:**

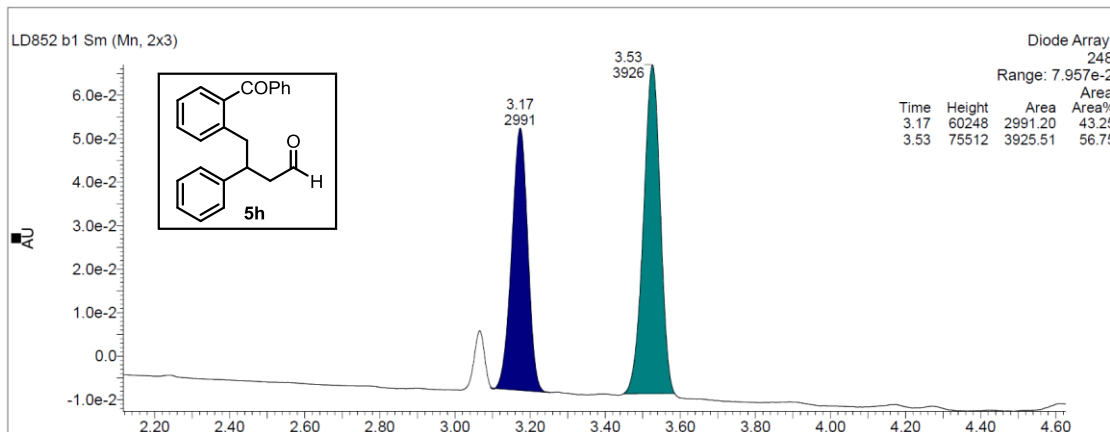

**Enantioenriched sample 5h:**

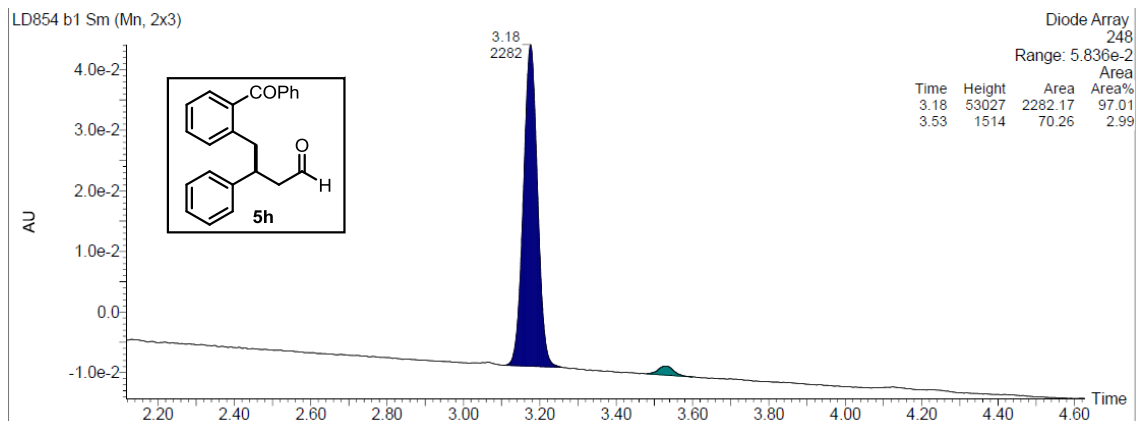

**Condition:** UPC<sup>2</sup> analysis on a Daicel Chiralpak IC column using a gradient method (from 100% CO<sup>2</sup> to 60:40 CO<sup>2</sup>:ACN), flow rate 2.00 mL/min over 5 min;  $\lambda = 248$  nm

**Racemic sample 5i:**

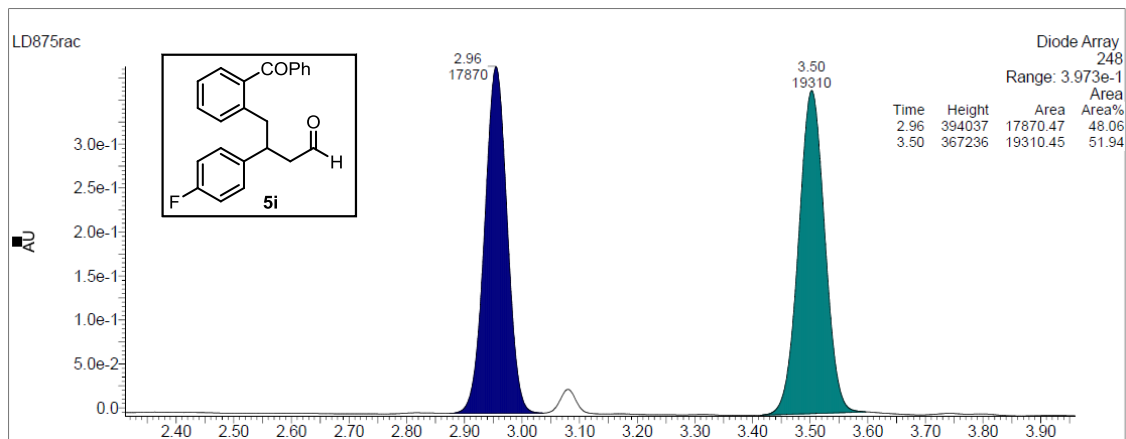

**Enantioenriched sample 5i:**

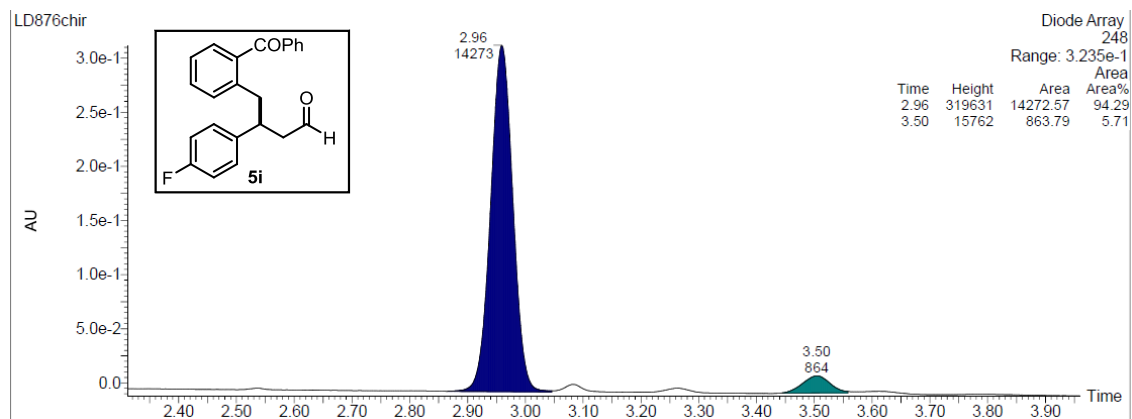

**Condition:** UPC<sup>2</sup> analysis on a Daicel Chiralpak IC column using a gradient method (from 100% CO<sup>2</sup> to 60:40 CO<sup>2</sup>:ACN), flow rate 2.00 mL/min over 5 min;  $\lambda = 247$  nm

**Racemic sample 5j:**

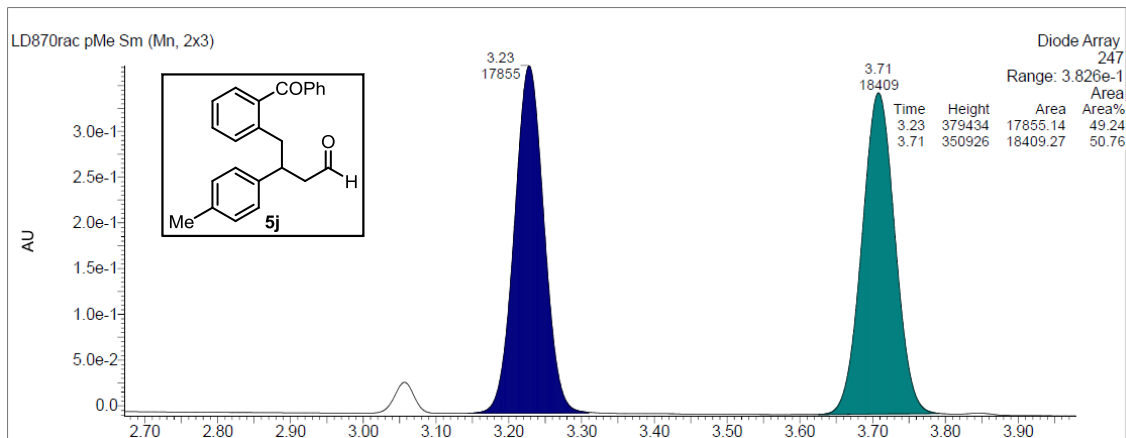

**Enantioenriched sample 5j:**

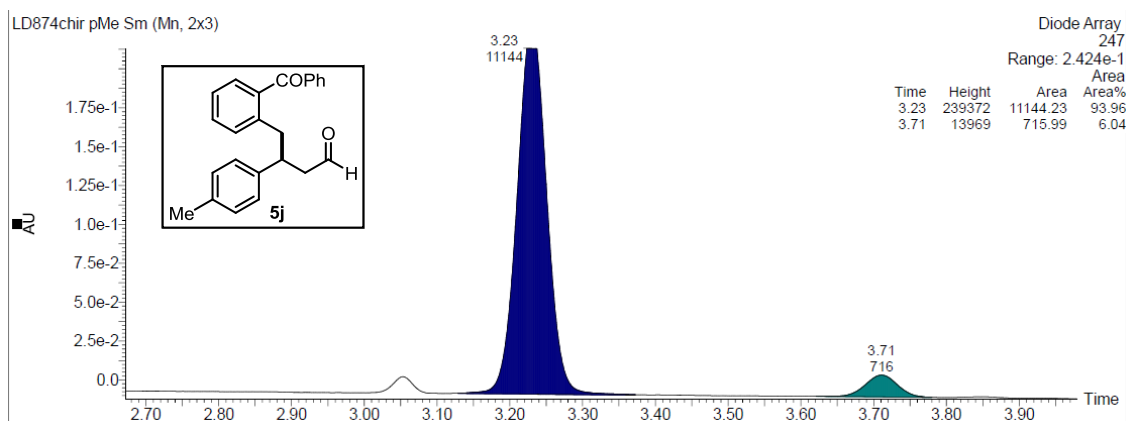

**Condition:** UPC<sup>2</sup> analysis on a Daicel Chiralpak IC column using a gradient method (from 100% CO<sub>2</sub> to 60:40 CO<sub>2</sub>:ACN), flow rate 2.00 mL/min over 5 min;  $\lambda = 247$  nm

**Racemic sample 5k:**

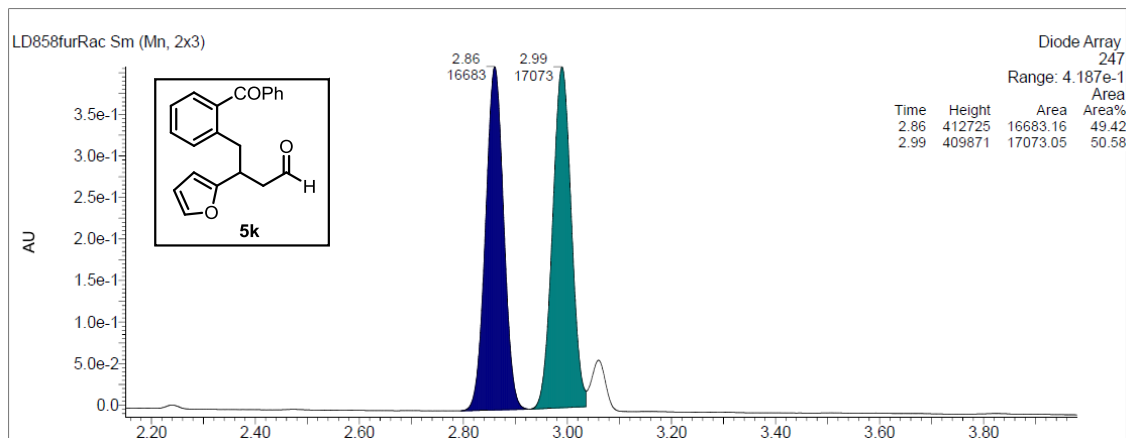

**Enantioenriched sample 5k:**

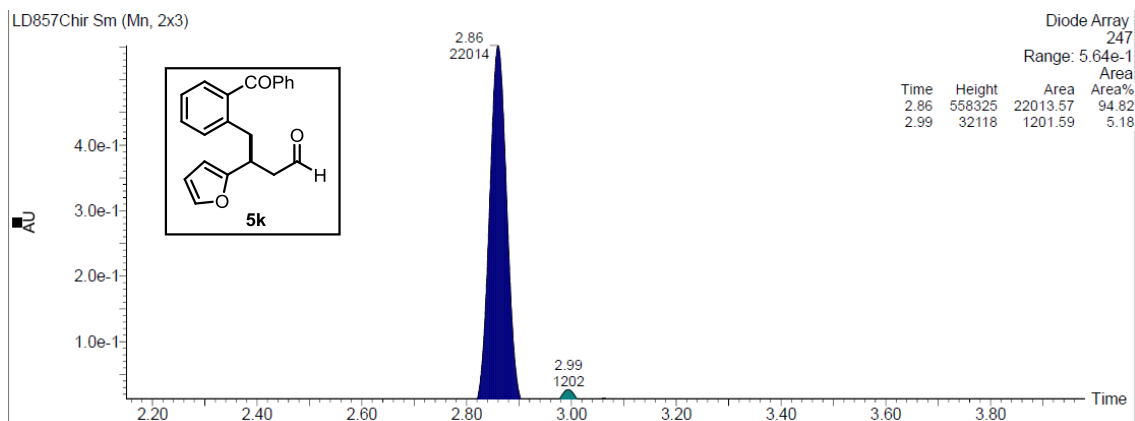

**Condition:** HPLC analysis on a Daicel Chiralpak IC column (55:42:3 hexane:iPrOH:DCM), flow rate 0.90 mL/min;  $\lambda = 254 \text{ nm}$

**Racemic sample 5I:**

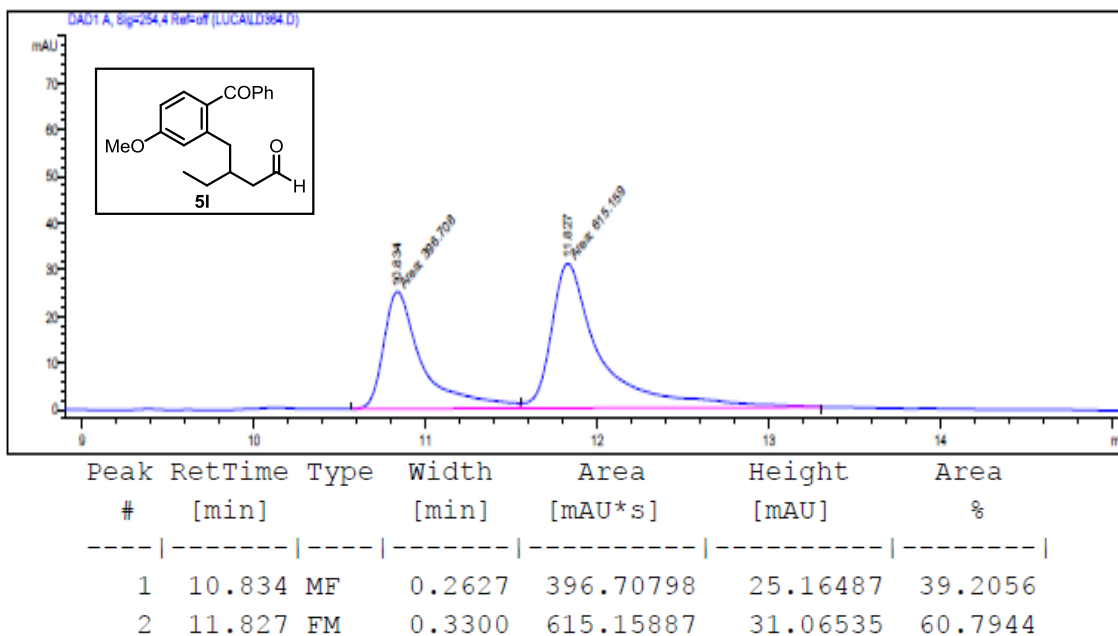

**Enantioenriched sample 5I:**

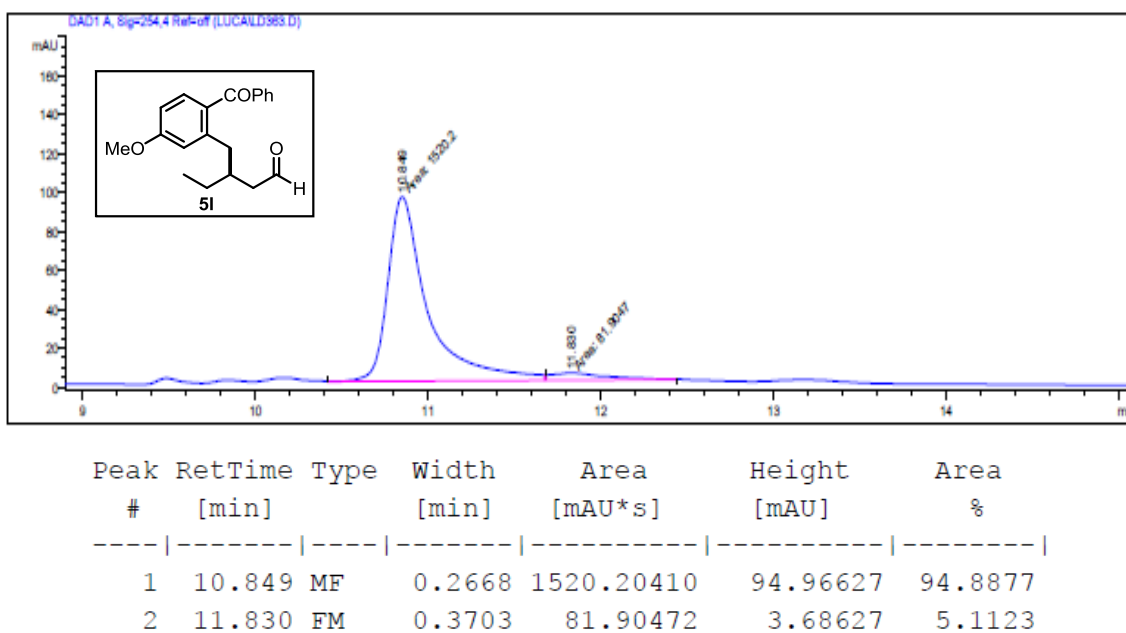

**Condition:** HPLC analysis on a Daicel Chiralpak IA column (96:2:2 hexane:iPrOH:DCM), flow rate 0.70 mL/min;  $\lambda = 254 \text{ nm}$

**Racemic sample 5m:**

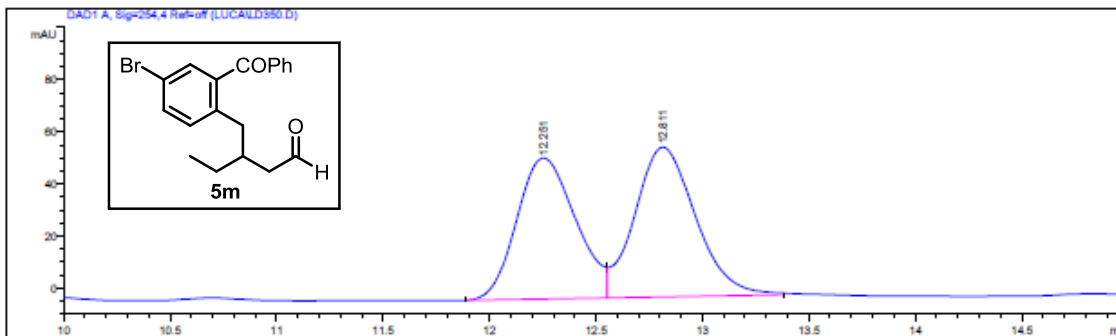

| Peak # | RetTime [min] | Type | Width [min] | Area [mAU*s] | Height [mAU] | Area %  |
|--------|---------------|------|-------------|--------------|--------------|---------|
| 1      | 12.251        | BV   | 0.2981      | 1040.54736   | 54.16446     | 47.6643 |
| 2      | 12.811        | VB   | 0.3040      | 1142.52820   | 57.46648     | 52.3357 |

**Enantioenriched sample 5m:**

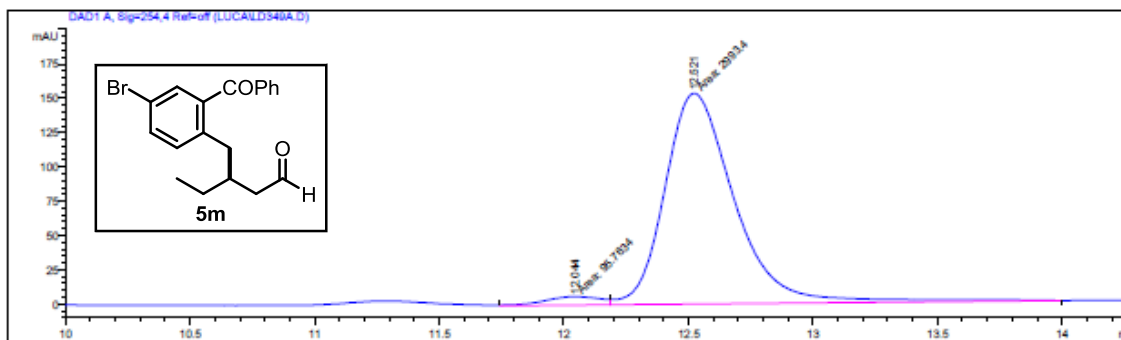

| Peak # | RetTime [min] | Type | Width [min] | Area [mAU*s] | Height [mAU] | Area %  |
|--------|---------------|------|-------------|--------------|--------------|---------|
| 1      | 12.044        | MF   | 0.2597      | 95.76341     | 6.14630      | 3.1000  |
| 2      | 12.521        | FM   | 0.3246      | 2993.40112   | 153.70894    | 96.9000 |

**Condition:** HPLC analysis on a Daicel Chiralpak IC column (85:15 hexane:iPrOH), flow rate 1.0 mL/min;  $\lambda = 254 \text{ nm}$

**Racemic sample 5n:**

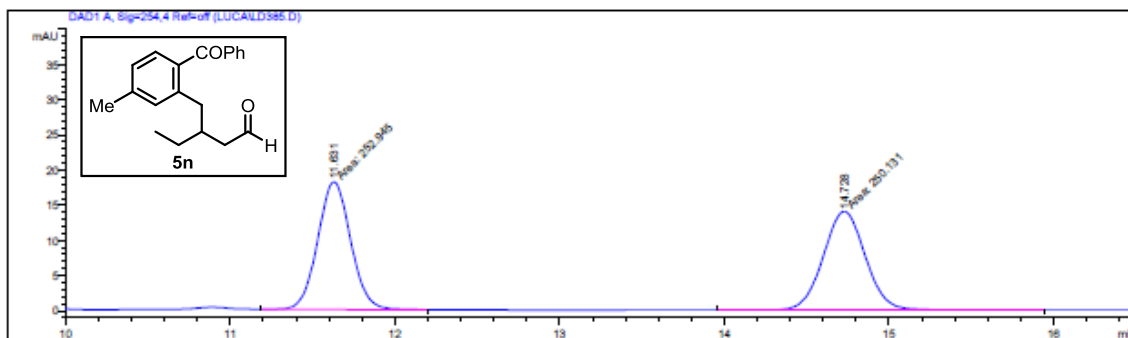

| Peak # | RetTime [min] | Type | Width [min] | Area [mAU*s] | Height [mAU] | Area %  |
|--------|---------------|------|-------------|--------------|--------------|---------|
| 1      | 11.631        | MM   | 0.2320      | 252.94456    | 18.17225     | 50.2796 |
| 2      | 14.728        | MM   | 0.2967      | 250.13094    | 14.04841     | 49.7204 |

**Enantioenriched sample 5n:**

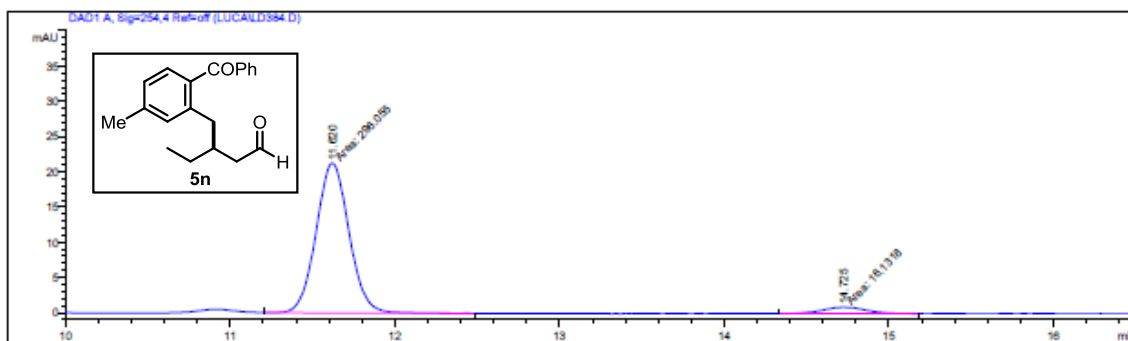

| Peak # | RetTime [min] | Type | Width [min] | Area [mAU*s] | Height [mAU] | Area %  |
|--------|---------------|------|-------------|--------------|--------------|---------|
| 1      | 11.620        | MM   | 0.2319      | 296.05478    | 21.27299     | 94.8326 |
| 2      | 14.725        | MM   | 0.2977      | 16.13179     | 9.03017e-1   | 5.1674  |



**Condition:** UPC<sup>2</sup> analysis on a Daicel Chiralpak IC column using a gradient method (from 100% CO<sup>2</sup> to 60:40 CO<sup>2</sup>:ACN), flow rate 2.00 mL/min over 5 min;  $\lambda = 248$  nm

**Racemic sample 5o:**

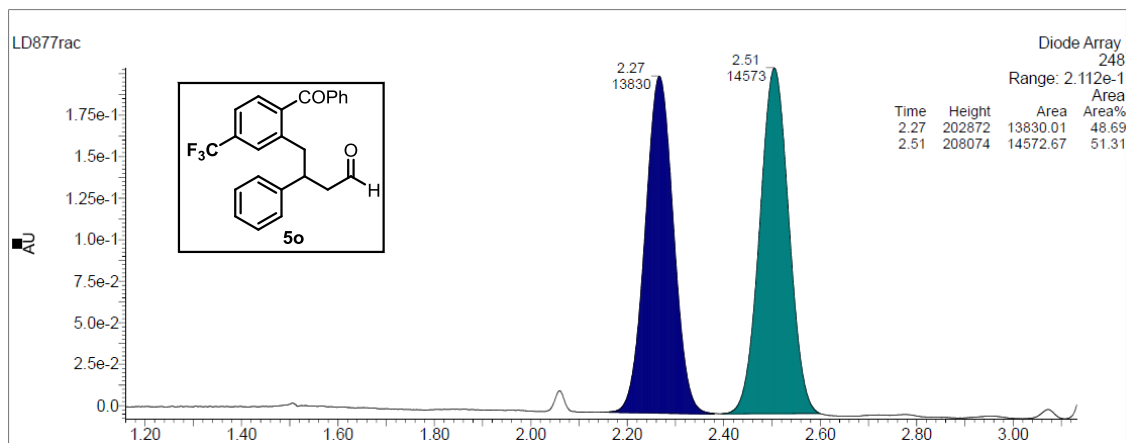

**Enantioenriched sample 5o:**

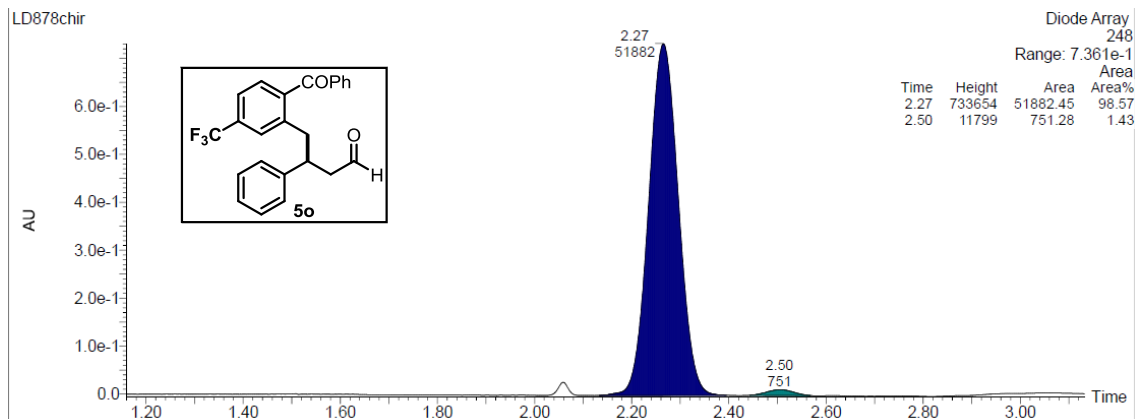

**Condition:** HPLC analysis on a Daicel Chiralpak IC column (97:03 hexane:iPrOH), flow rate 0.8 mL/min;  $\lambda = 254 \text{ nm}$

**Racemic sample 5p:**

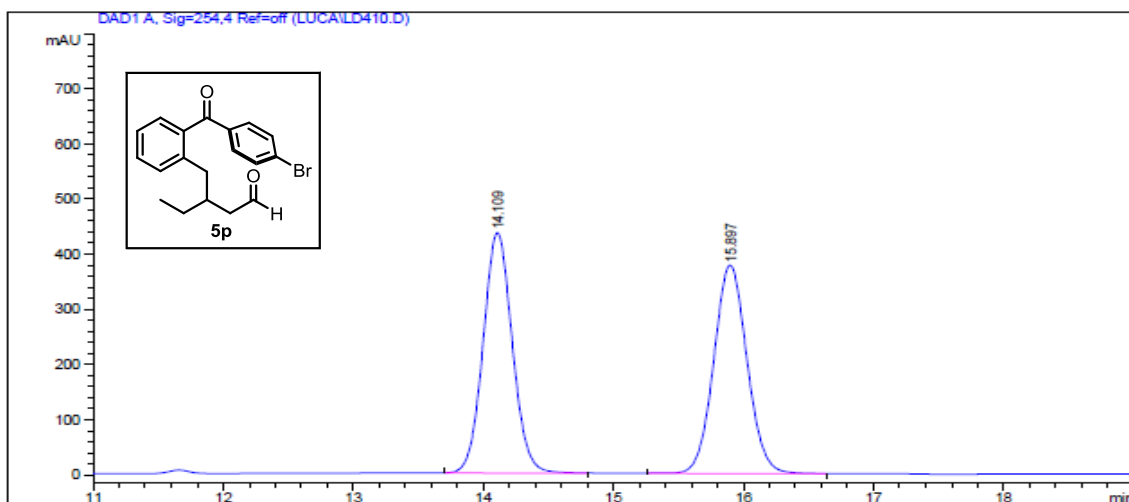

| Peak # | RetTime [min] | Type | Width [min] | Area [mAU*s] | Height [mAU] | Area %  |
|--------|---------------|------|-------------|--------------|--------------|---------|
| 1      | 14.109        | BB   | 0.2420      | 6801.81104   | 435.89511    | 50.2453 |
| 2      | 15.897        | BB   | 0.2758      | 6735.38525   | 378.12573    | 49.7547 |

**Enantioenriched sample 5p:**

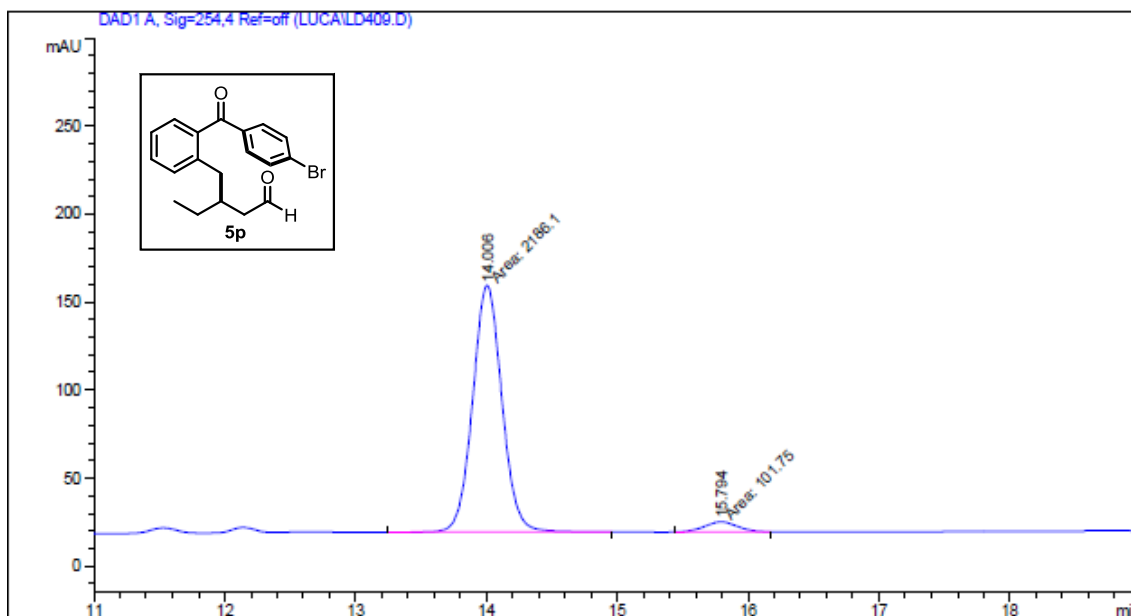

| Peak # | RetTime [min] | Type | Width [min] | Area [mAU*s] | Height [mAU] | Area %  |
|--------|---------------|------|-------------|--------------|--------------|---------|
| 1      | 14.006        | MM   | 0.2600      | 2186.09985   | 140.12781    | 95.5526 |
| 2      | 15.794        | MM   | 0.2978      | 101.75038    | 5.69487      | 4.4474  |

**Condition:** HPLC analysis on a Daicel Chiralpak IC-3 column 85:15 hexane:*i*PrOH flow rate 1.00 mL/min;  $\lambda = 254 \text{ nm}$

**Racemic sample 5q:**

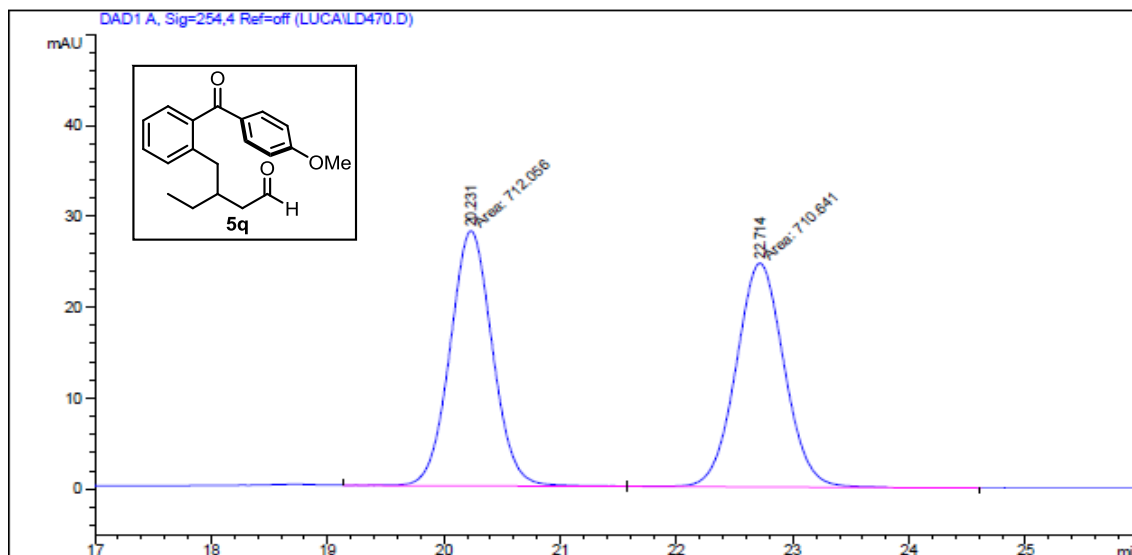

| Peak # | RetTime [min] | Type | Width [min] | Area [mAU*s] | Height [mAU] | Area %  |
|--------|---------------|------|-------------|--------------|--------------|---------|
| 1      | 20.231        | MF   | 0.4230      | 712.05621    | 28.05388     | 50.0497 |
| 2      | 22.714        | FM   | 0.4810      | 710.64130    | 24.62222     | 49.9503 |

**Enantioenriched sample 5q:**

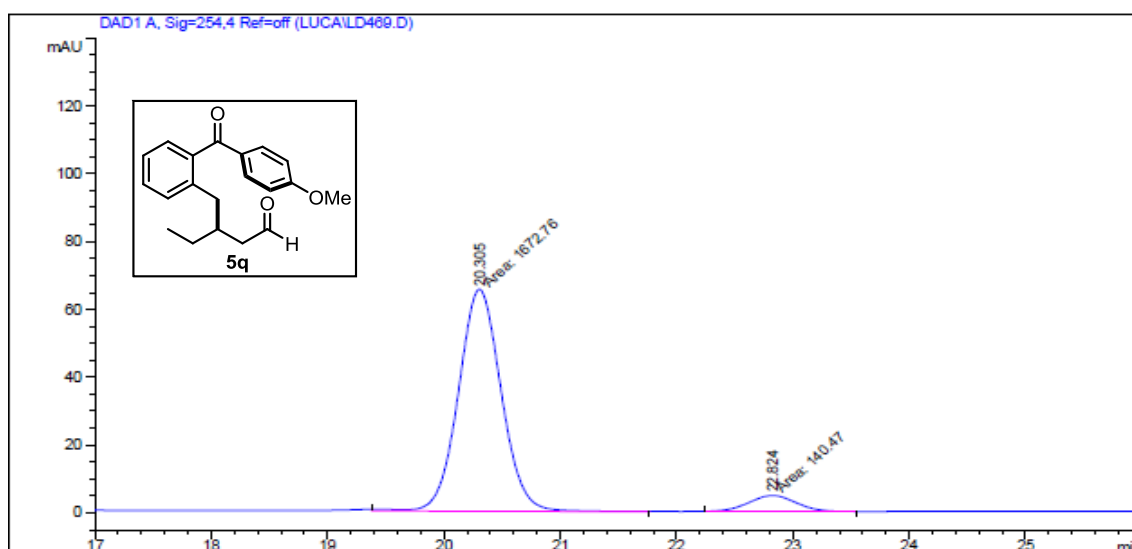

| Peak # | RetTime [min] | Type | Width [min] | Area [mAU*s] | Height [mAU] | Area %  |
|--------|---------------|------|-------------|--------------|--------------|---------|
| 1      | 20.305        | FM   | 0.4264      | 1672.75500   | 65.38972     | 92.2530 |
| 2      | 22.824        | MM   | 0.4887      | 140.46997    | 4.79073      | 7.7470  |

**Condition:** UPC<sup>2</sup> analysis on a Daicel Chiralpak IC column using a gradient method (from 100% CO<sub>2</sub> to 60:40 CO<sub>2</sub>:ACN), flow rate 2.00 mL/min over 6 min;  $\lambda = 283$  nm

**Racemic sample 5r:**

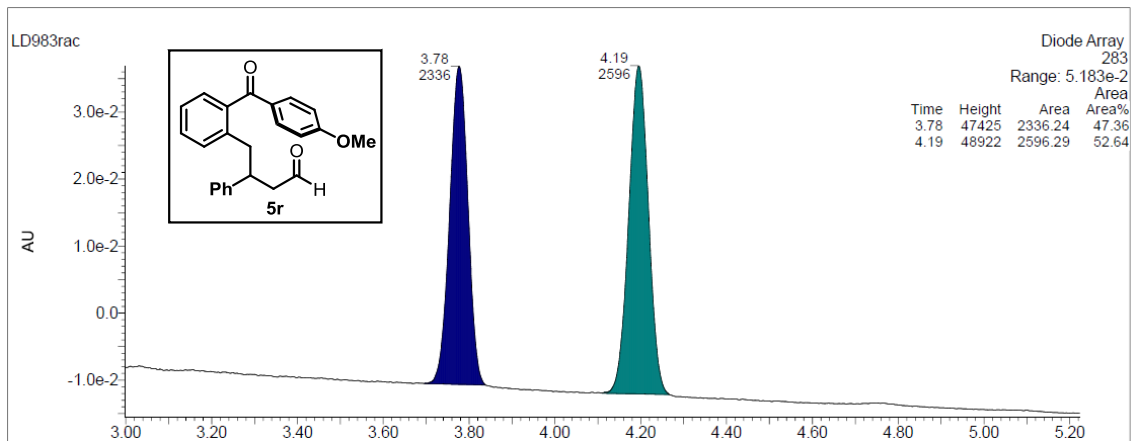

**Enantioenriched sample 5r:**

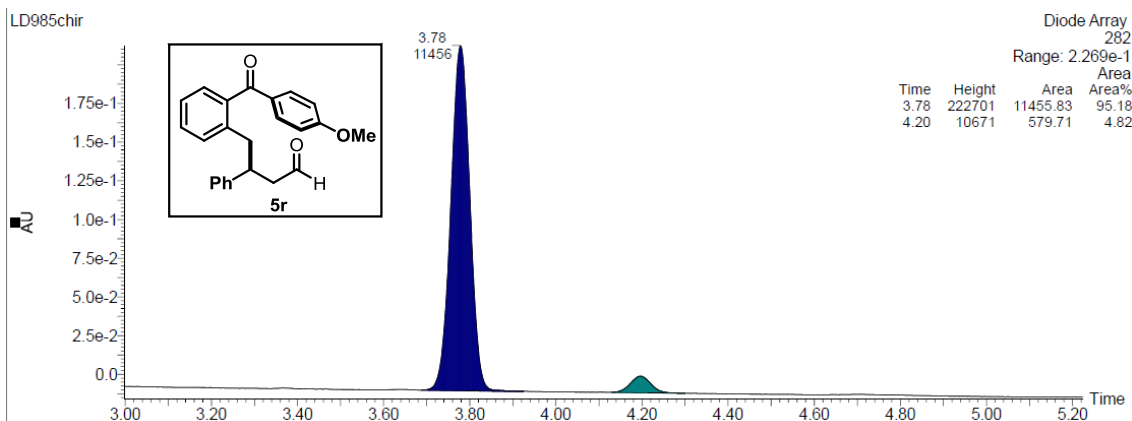

**Condition:** HPLC analysis on a Daicel Chiralpak IC-3 column using an isocratic method (Hexane : i-PrOH, 98:2), flow rate 0.7 mL/min;  $\lambda = 254 \text{ nm}$

**Racemic sample 5s:**

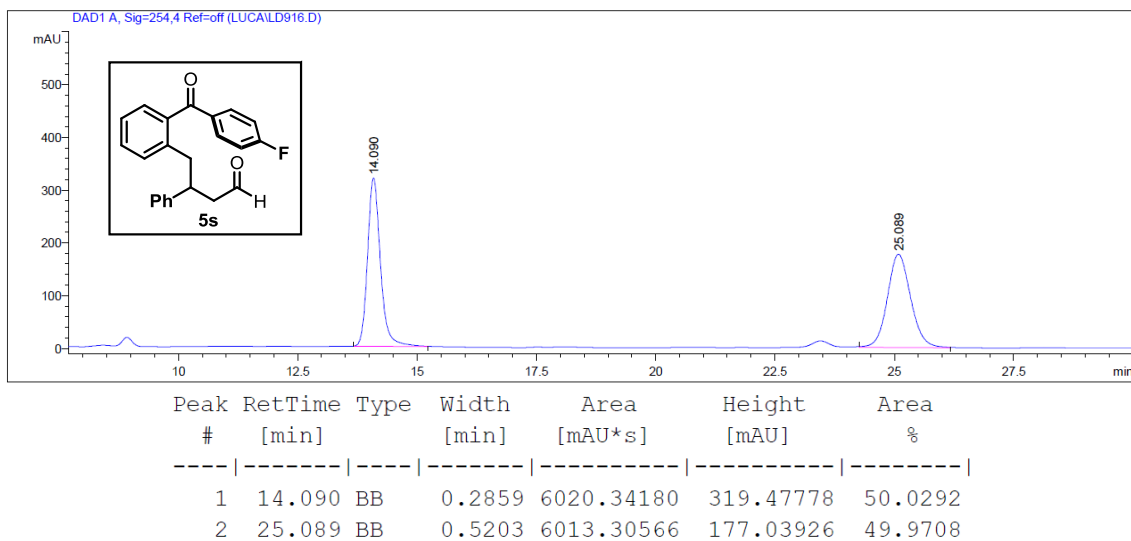

**Enantioenriched sample 5s:**

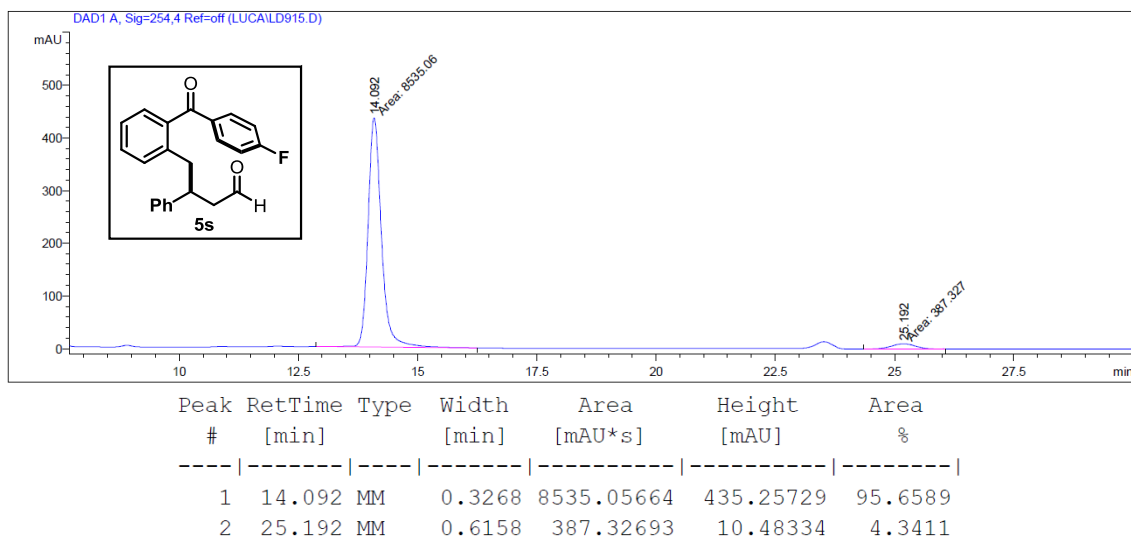

**Condition:** HPLC analysis on a Daicel Chiralpak IC-3 column (85:15 hexane:*i*PrOH), flow rate 0.8 mL/min;  $\lambda = 254 \text{ nm}$

**Racemic sample 5t:**

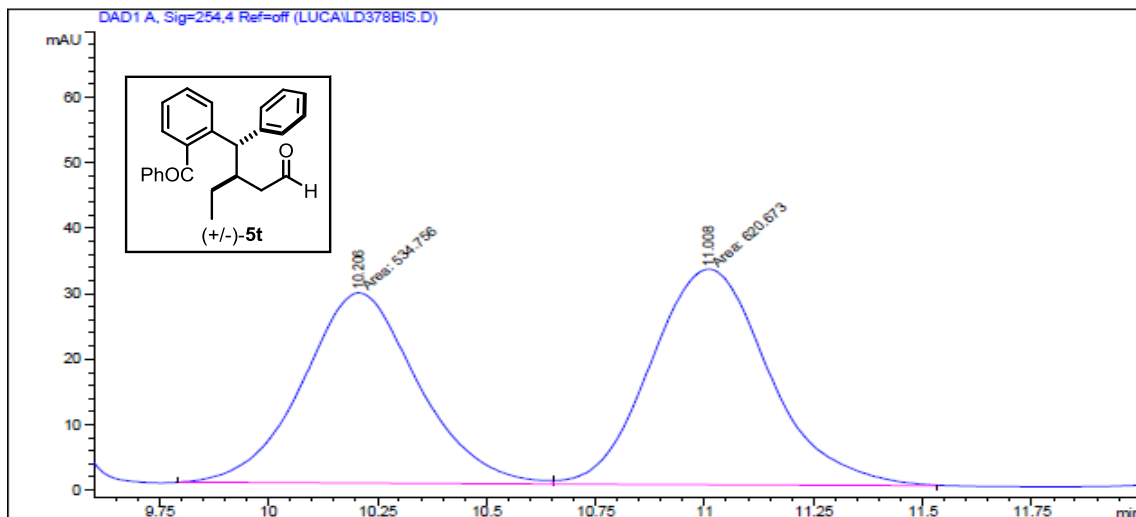

| Peak # | RetTime [min] | Type | Width [min] | Area [mAU*s] | Height [mAU] | Area %  |
|--------|---------------|------|-------------|--------------|--------------|---------|
| 1      | 10.206        | MF   | 0.3070      | 534.75592    | 29.02751     | 46.2820 |
| 2      | 11.008        | FM   | 0.3144      | 620.67297    | 32.90187     | 53.7180 |

**Enantioenriched sample 5t:**

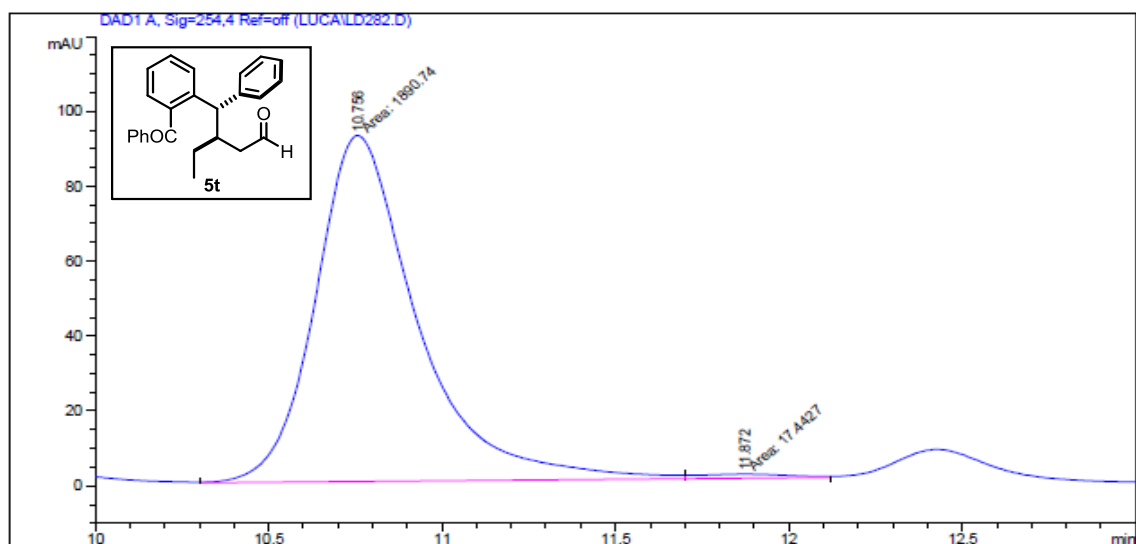

| Peak # | RetTime [min] | Type | Width [min] | Area [mAU*s] | Height [mAU] | Area %  |
|--------|---------------|------|-------------|--------------|--------------|---------|
| 1      | 10.756        | MF   | 0.3411      | 1890.73657   | 92.38043     | 99.0859 |
| 2      | 11.872        | FM   | 0.2888      | 17.44273     | 1.00669      | 0.9141  |

**Condition:** HPLC analysis on a Daicel Chiralpak IB column (85:15 hexane:*i*PrOH), flow rate 1.0 mL/min;  $\lambda = 254 \text{ nm}$

**Racemic sample 5u:**

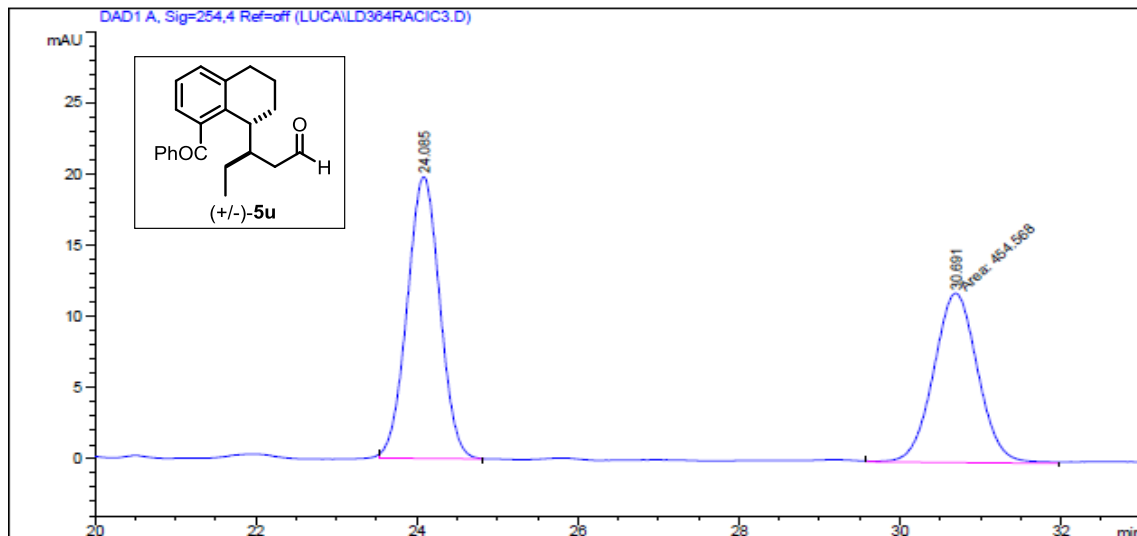

| Peak # | RetTime [min] | Type | Width [min] | Area [mAU*s] | Height [mAU] | Area %  |
|--------|---------------|------|-------------|--------------|--------------|---------|
| 1      | 24.085        | BB   | 0.4382      | 556.50024    | 19.78127     | 55.0408 |
| 2      | 30.691        | MM   | 0.6367      | 454.56784    | 11.89833     | 44.9592 |

**Enantioenriched sample 5u:**

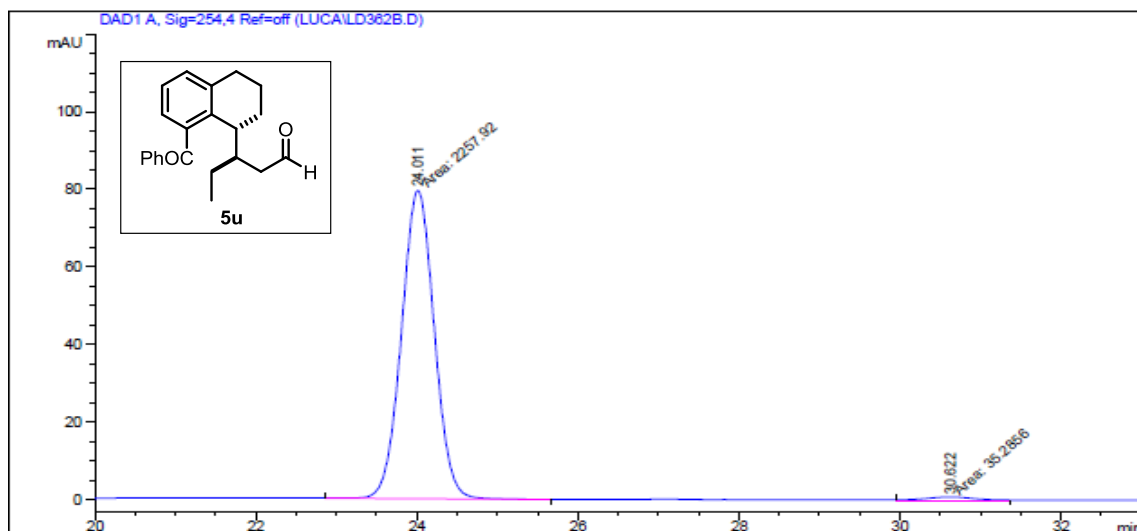

| Peak # | RetTime [min] | Type | Width [min] | Area [mAU*s] | Height [mAU] | Area %  |
|--------|---------------|------|-------------|--------------|--------------|---------|
| 1      | 24.011        | MM   | 0.4732      | 2257.91821   | 79.52377     | 98.4613 |
| 2      | 30.622        | MM   | 0.6682      | 35.28564     | 8.80142e-1   | 1.5387  |

**Condition:** HPLC analysis on a Daicel Chiralpak IC-3 column (95:5 hexane:*i*PrOH), flow rate 0.9 mL/min;  $\lambda = 254 \text{ nm}$

**Racemic sample 5v (Major diastereoisomer):**

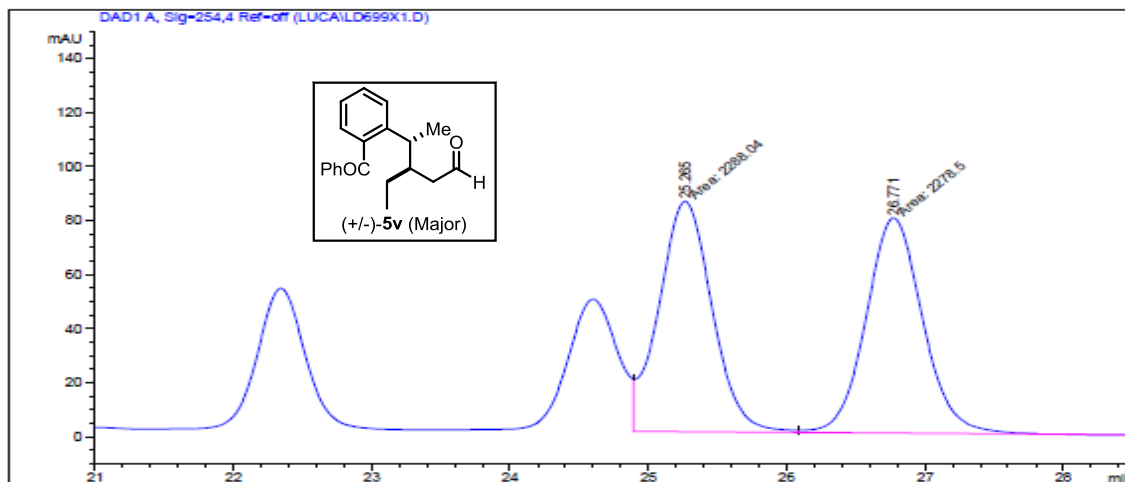

| Peak # | RetTime [min] | Type | Width [min] | Area [mAU*s] | Height [mAU] | Area %  |
|--------|---------------|------|-------------|--------------|--------------|---------|
| 1      | 25.265        | MF   | 0.4467      | 2288.04297   | 85.37150     | 50.1045 |
| 2      | 26.771        | FM   | 0.4761      | 2278.50000   | 79.77052     | 49.8955 |

**Enantioenriched sample 5v:**

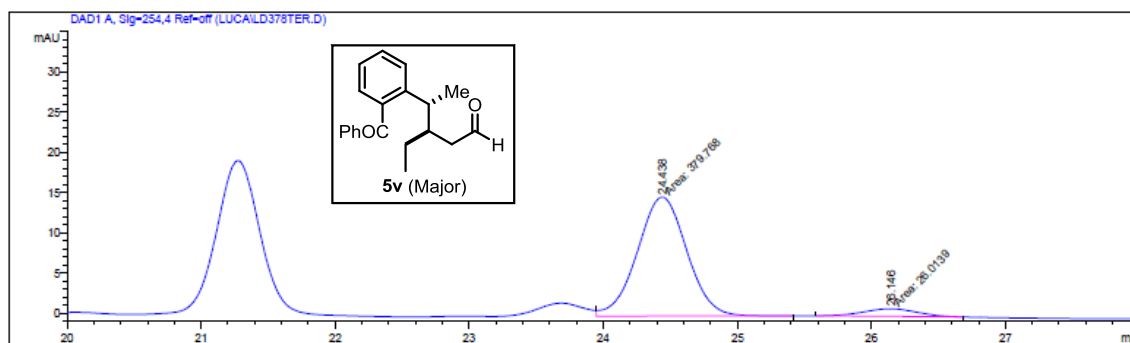

| Peak # | RetTime [min] | Type | Width [min] | Area [mAU*s] | Height [mAU] | Area %  |
|--------|---------------|------|-------------|--------------|--------------|---------|
| 1      | 24.438        | FM   | 0.4275      | 379.76779    | 14.80707     | 93.5892 |
| 2      | 26.146        | MM   | 0.4662      | 26.01393     | 9.29904e-1   | 6.4108  |



**Condition:** HPLC analysis on a Daicel Chiralpak IC-3 column (95:5 hexane:*i*PrOH), flow rate 0.9 mL/min;  $\lambda = 254$  nm

**Racemic sample 5v (Minor diastereoisomer):**

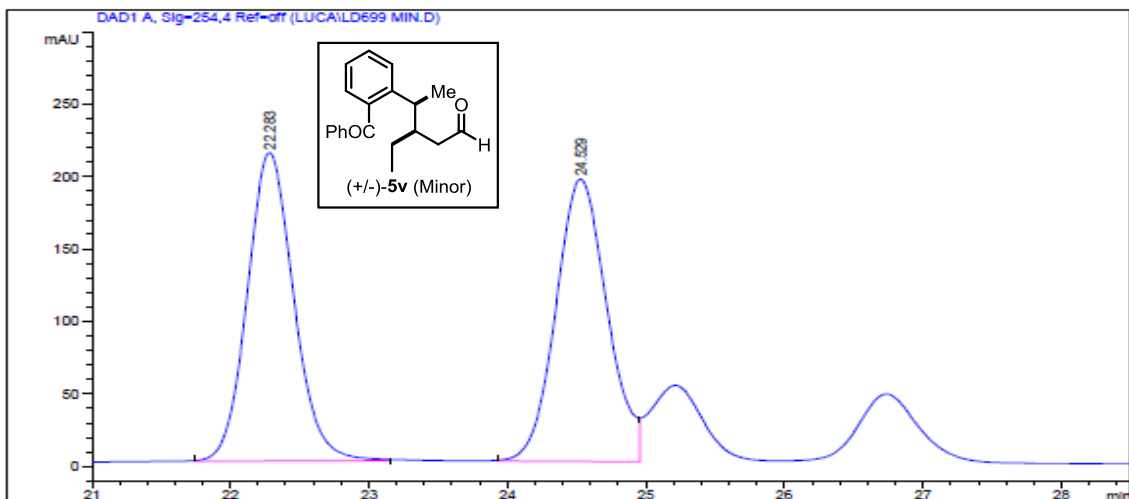

| Peak # | RetTime [min] | Type | Width [min] | Area [mAU*s] | Height [mAU] | Area %  |
|--------|---------------|------|-------------|--------------|--------------|---------|
| 1      | 22.283        | BB   | 0.3599      | 4960.53516   | 212.82335    | 49.7805 |
| 2      | 24.529        | BV   | 0.3958      | 5004.28760   | 194.75798    | 50.2195 |

**Enantioenriched sample 5v:**

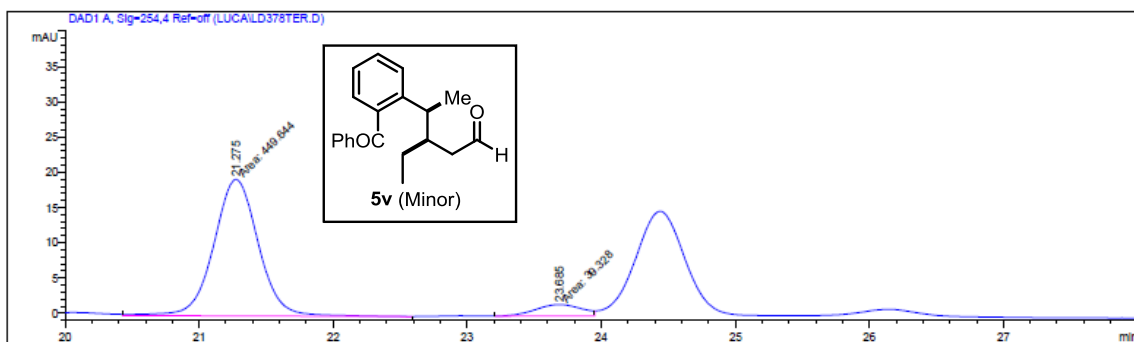

| Peak # | RetTime [min] | Type | Width [min] | Area [mAU*s] | Height [mAU] | Area %  |
|--------|---------------|------|-------------|--------------|--------------|---------|
| 1      | 21.275        | FM   | 0.3870      | 449.64352    | 19.36314     | 91.9570 |
| 2      | 23.685        | MF   | 0.3968      | 39.32801     | 1.65188      | 8.0430  |

**Condition:** HPLC analysis on a Daicel Chiralpak IC-3 column using an isocratic method (80:20 Hexane:*i*PrOH), flow rate 0.4 mL/min;  $\lambda = 247$  nm

**Racemic sample 5w:**

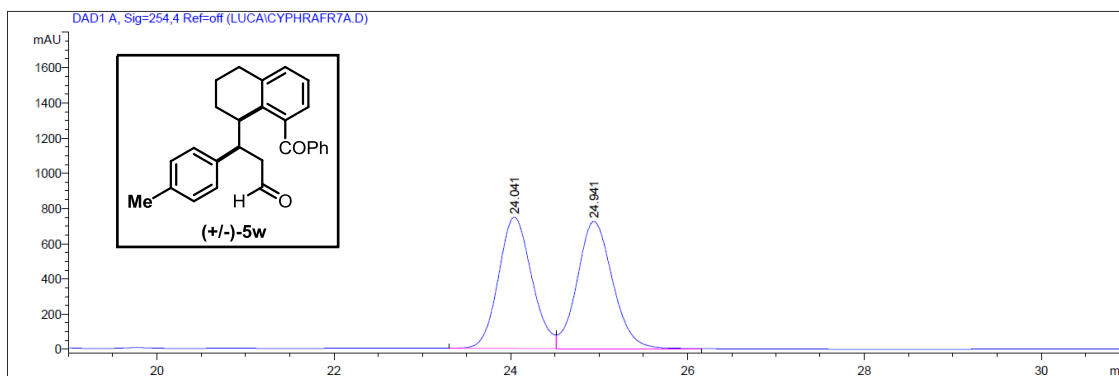

| Peak # | RetTime [min] | Type | Width [min] | Area [mAU*s] | Height [mAU] | Area %  |
|--------|---------------|------|-------------|--------------|--------------|---------|
| 1      | 24.041        | BV   | 0.4031      | 1.94724e4    | 744.71960    | 49.1934 |
| 2      | 24.941        | VB   | 0.4288      | 2.01110e4    | 722.37164    | 50.8066 |

**Enantioenriched sample 5w:**

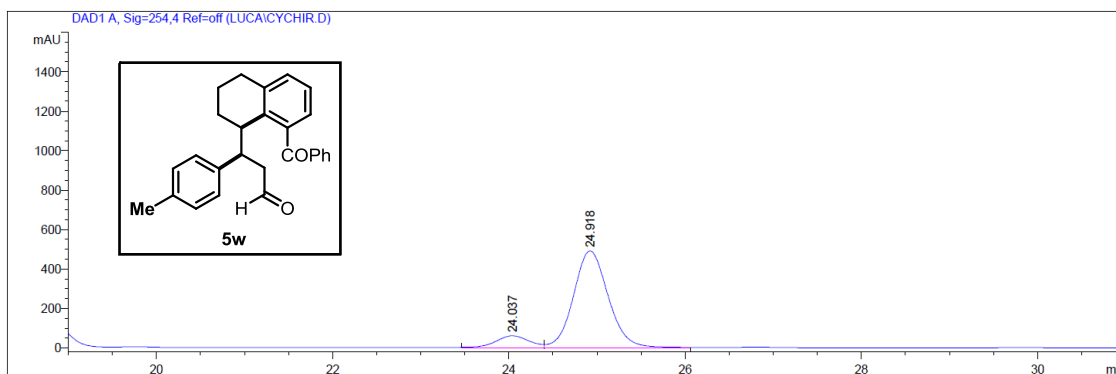

| Peak # | RetTime [min] | Type | Width [min] | Area [mAU*s] | Height [mAU] | Area %  |
|--------|---------------|------|-------------|--------------|--------------|---------|
| 1      | 24.037        | BV   | 0.4004      | 1522.06580   | 58.72913     | 10.2344 |
| 2      | 24.918        | VB   | 0.4200      | 1.33501e4    | 489.78726    | 89.7656 |

**Condition:** HPLC analysis on a Daicel Chiralpak IC-3 column using an isocratic method (98:2 hexane:*i*PrOH) flow rate 0.80 mL/min;  $\lambda = 254 \text{ nm}$

**Racemic sample 6:**

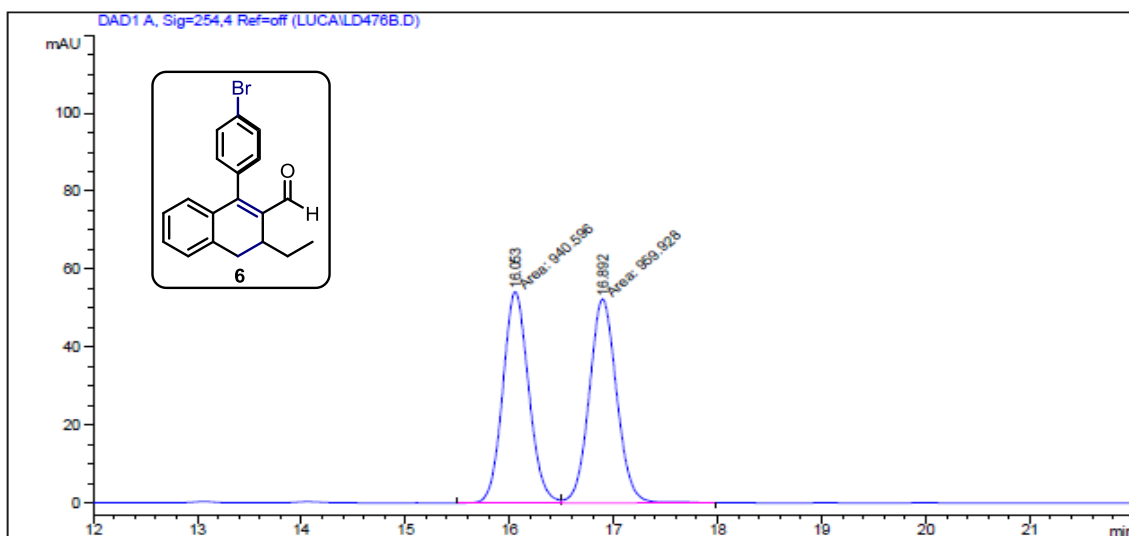

| Peak # | RetTime [min] | Type | Width [min] | Area [mAU*s] | Height [mAU] | Area %  |
|--------|---------------|------|-------------|--------------|--------------|---------|
| 1      | 16.053        | MF   | 0.2891      | 940.59619    | 54.22182     | 49.4914 |
| 2      | 16.892        | FM   | 0.3056      | 959.92847    | 52.34462     | 50.5086 |

**Enantioenriched sample 6:**

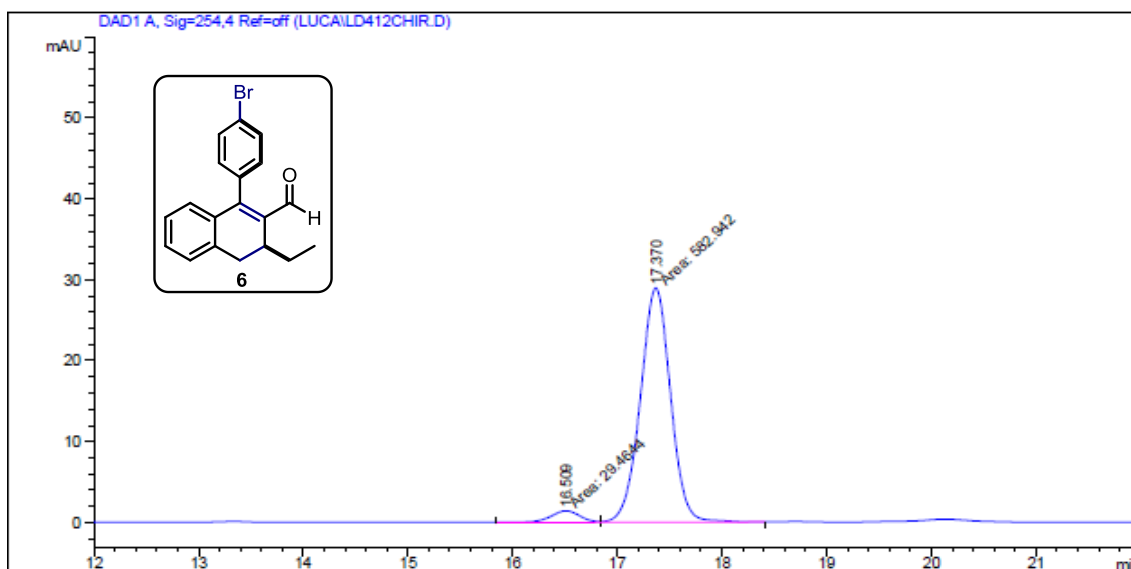

| Peak # | RetTime [min] | Type | Width [min] | Area [mAU*s] | Height [mAU] | Area %  |
|--------|---------------|------|-------------|--------------|--------------|---------|
| 1      | 16.509        | MF   | 0.3362      | 29.46443     | 1.46060      | 4.8113  |
| 2      | 17.370        | FM   | 0.3351      | 582.94232    | 28.99752     | 95.1887 |
